# Supplementary material for: Asymmetric 5-endo chloroetherification of homoallylic alcohols toward the synthesis of chiral β-chlorotetrahydrofurans
Source: Royal Society of Chemistry journal article supplement (doi:10.1039/c2cc38436a), 2012-12-21

## Electronic Supplementary Information

### Asymmetric 5-*endo* chloroetherification of homoallylic alcohols toward the synthesis of chiral $\beta$ -chlorotetrahydrofurans

Xianghua Zeng,<sup>ab</sup> Chengxia Miao,<sup>a</sup> Shoufeng Wang,<sup>a</sup> Chungu Xia<sup>\*a</sup> and Wei Sun<sup>\*</sup>

#### 1. General Remarks

The  $^1\text{H}$  and  $^{13}\text{C}$  NMR spectra were recorded on a Bruker Avance III 400 MHz spectrometer. The chemical shifts ( $\delta$ ) are reported in ppm and coupling constants ( $J$ ) in Hz. GC-MS was measured on Agilent 7890A/5975 C spectrometer. HRMS (ESI) was determined on a Bruker Daltonics micrOTOF-Q<sup>II</sup> mass spectrometer. HPLC analysis was performed on Waters-Breeze (2487 Dual  $\lambda$  Absorbance Detector and 1525 Binary HPLC Pump). Chiralpak OD, AD, OJ columns were purchased from Daicel Chemical Industries, LTD. Column chromatography was generally performed on silica gel (200-300 mesh) and TLC inspections were on silica gel GF<sub>254</sub> plates. Optical rotations were determined by using a Perkin-Elmer 341 LC polarimeter.

Unless otherwise stated, all commercial reagents and solvents were used as received. All the chiral starting materials were purchased from Aldrich, Alfa and Acros and used directly. Catalysts of **3a**<sup>1</sup>, **3b**<sup>2</sup>, **4a**<sup>3</sup>, **4b**<sup>4</sup>, **5a-5j**<sup>5-8</sup> were synthesized according to the reported methods.

#### 2.1 General procedure for the preparation of but-3-en-1-ol compounds 1a-p.

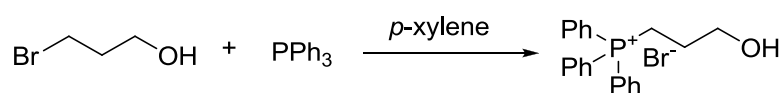

Under argon atmosphere, triphenylphosphine (9.5 g, 36.2 mmol), 3-bromopropan-1-ol (5.0 g, 36 mmol) and *p*-xylene (30 mL) were added in a round bottom flask equipped with a mechanical stirrer. The mixture was heated to 130 °C and stirred for 6 hours. After that, the reaction was then cooled to room temperature and ether (50 mL) was added. The solids were collected by filtration and dried under vacuum to afford 3-(triphenylphosphonium)propan-1-ol bromide as a white solid which was used in the next step without further purification.

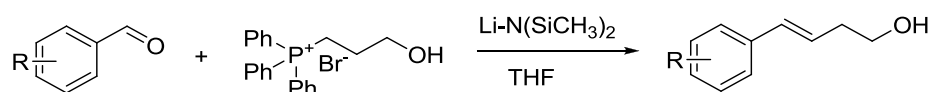

10.5 mmol of lithium bis(trimethylsilyl)amide was added dropwise at -20 °C or -78 °C to a suspension of 4.5 mmol of (3-propan-1-ol)triphenylphosphonium bromide in 10 mL of tetrahydrofuran. The solution was stirred at -20 °C for 1 hour and 3.75 mmol of aldehyde was added dropwise. After that, the mixture was stirred at the same temperature for 2 hours. The mixture was warmed to room temperature and stirred for another 12 hours, then saturated aqueous NH<sub>4</sub>Cl solution was added. The organic layer was dried over MgSO<sub>4</sub> and then concentrated under reduced pressure. The residue was purified by flash column chromatography (EtOAc/Petroleum = 1/5; v/v).

**1a, (*E*)-4-o-tolylbut-3-en-1-ol:**

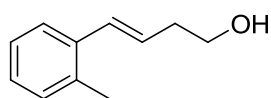

Colorless oil; 71% yield. <sup>1</sup>H NMR (400 MHz, CDCl<sub>3</sub>): δ = 7.12-7.21 (m, 4H), 6.69 (d, 1H, *J* = 15.6 Hz), 6.06 (dt, 1H, *J* = 7.2, 1.2 Hz), 3.72-3.75 (m, 2H), 2.47-2.52 (m, 2H), 2.33 (s, 3H), 1.75 (br s, 1H) ppm; <sup>13</sup>C NMR (100 MHz, CDCl<sub>3</sub>): δ = 136.4, 135.9, 130.3, 129.0, 127.2, 126.1, 125.5, 62.1, 36.7, 19.9 ppm; HRMS Calcd for C<sub>11</sub>H<sub>14</sub>NaO: [M+Na]<sup>+</sup>, 185.0933. Found: *m/z* 185.0928.

**1b, (*E*)-4-m-tolylbut-3-en-1-ol**

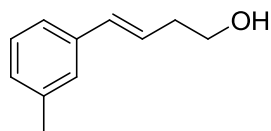

Colorless oil; 78% yield. <sup>1</sup>H NMR (400 MHz, CDCl<sub>3</sub>): δ = 7.10-7.23 (m, 3H), 7.03 (d, 1H, *J* = 6.8 Hz), 6.45 (d, 1H, *J* = 16.0 Hz), 6.18 (dt, 1H, dt, 1H, *J* = 7.2, 1.6 Hz), 3.71-3.74 (m, 2H), 2.45-2.48 (m, 2H), 2.33 (s, 3H), 1.83 (br s, 1H) ppm; <sup>13</sup>C NMR (100 MHz, CDCl<sub>3</sub>): δ = 138.1, 137.2, 132.9, 128.5, 128.1, 126.8, 126.1, 123.3, 62.1, 36.4, 21.4 ppm; HRMS Calcd for C<sub>11</sub>H<sub>14</sub>NaO: [M+Na]<sup>+</sup>, 185.0937. Found: *m/z* 185.0935.

**1c, (*E*)-4-p-tolylbut-3-en-1-ol:**

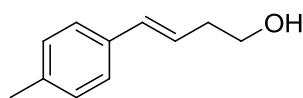

White solid; 65% yield. <sup>1</sup>H NMR (400 MHz, CDCl<sub>3</sub>): δ = 7.24 (d, 2H, *J* = 6.0), 7.11 (d, 2H, *J* = 8.0 Hz), 6.46 (d, 1H, *J* = 16.0 Hz), 6.14 (dt, 1H, *J* = 7.2, 1.6 Hz), 3.72-3.75 (m, 2H), 2.46-2.49 (m, 2H), 2.32 (s, 3H), 1.62 (br s, 1H) ppm; <sup>13</sup>C NMR (100 MHz, CDCl<sub>3</sub>): δ = 137.1, 134.5, 132.7, 129.3, 126.0, 125.2, 62.1, 36.4, 21.2 ppm; HRMS Calcd for C<sub>11</sub>H<sub>14</sub>NaO: [M+Na]<sup>+</sup>, 185.0938. Found: *m/z* 185.0941.

**1d, (E)-4-(4-hydroxybut-1-enyl)phenol:**

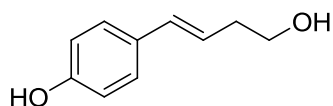

White solid; 52% yield.  $^1\text{H}$  NMR (400 MHz, DMSO):  $\delta$  = 9.30 (d, 1H,  $J$  = 8.0 Hz), 7.10 (d, 2H,  $J$  = 8.0 Hz), 6.61 (d, 2H,  $J$  = 8.4 Hz), 6.22 (d, 1H,  $J$  = 16.0 Hz), 5.91-5.99 (m, 1H), 4.47 (t, 1H,  $J$  = 4.0 Hz), 3.38-3.44 (q, 2H,  $J$  = 8.0 Hz), 2.18-2.33 (q, 2H,  $J$  = 8.0 Hz) ppm;  $^{13}\text{C}$  NMR (100 MHz, DMSO):  $\delta$  = 156.5, 130.6, 128.4, 126.9, 124.2, 115.3, 60.9, 36.4 ppm; HRMS Calcd for  $\text{C}_{10}\text{H}_{12}\text{NaO}_2$ :  $[\text{M}+\text{Na}]^+$ , 187.0721. Found:  $m/z$  187.0717.

**1e, (E)-4-(2-methoxyphenyl)but-3-en-1-ol:**

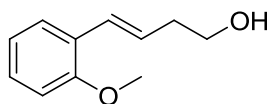

Colorless oil; 63% yield.  $^1\text{H}$  NMR (400 MHz,  $\text{CDCl}_3$ ):  $\delta$  = 7.27-7.30 (m, 1H), 7.07-7.12 (m, 1H), 6.66-6.79 (m, 3H), 6.06 (dt, 1H,  $J$  = 7.2, 1.6 Hz), 3.70 (s, 3H), 3.60-3.63 (m, 2H), 2.34-2.39 (m, 2H), 1.62 (br s, 1H) ppm;  $^{13}\text{C}$  NMR (100 MHz,  $\text{CDCl}_3$ ):  $\delta$  = 156.4, 128.3, 127.6, 127.0, 126.6, 126.3, 120.7, 110.9, 62.1, 55.4, 36.9 m; HRMS Calcd for  $\text{C}_{11}\text{H}_{14}\text{NaO}_2$ :  $[\text{M}+\text{Na}]^+$ , 201.0087. Found:  $m/z$  201.0081.

**1f, (E)-4-(3-methoxyphenyl)but-3-en-1-ol:**

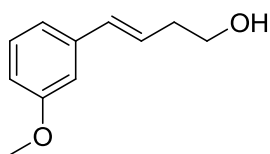

Colorless oil; 70% yield.  $^1\text{H}$  NMR (400 MHz,  $\text{CDCl}_3$ ):  $\delta$  = 7.19-7.23 (t, 1H,  $J$  = 8.0 Hz), 6.95 (d, 1H,  $J$  = 7.6 Hz), 6.89-6.90 (m, 1H), 6.78-6.79 (m, 1H), 6.76-6.77 (m, 1H), 6.46 (d, 1H,  $J$  = 15.6 Hz), 6.20 (dt, 1H,  $J$  = 7.2, 1.6 Hz), 3.80 (s, 1H), 3.73-3.76 (m, 2H), 2.45-2.50 (m, 2H), 1.75 (br s, 1H) ppm;  $^{13}\text{C}$  NMR (100 MHz,  $\text{CDCl}_3$ ):  $\delta$  = 159.8, 138.7, 132.7, 129.5, 126.8, 118.8, 112.9, 111.4, 62.0, 55.2, 36.4 ppm; HRMS Calcd for  $\text{C}_{11}\text{H}_{14}\text{NaO}_2$ :  $[\text{M}+\text{Na}]^+$ , 201.0086. Found:  $m/z$  201.0083.

**1g, (E)-4-(4-methoxyphenyl)but-3-en-1-ol:**

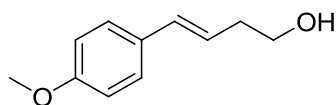

White solid; 81% yield.  $^1\text{H}$  NMR (400 MHz,  $\text{CDCl}_3$ ):  $\delta$  = 7.29 (dd, 2H,  $J$  = 4.8, 2.0 Hz), 6.84 (d, 2H,  $J$  = 8.8 Hz), 6.44 (d, 1H,  $J$  = 16.0 Hz), 6.05 (dt, 1H,  $J$  = 7.2, 1.2 Hz), 3.80 (s, 3H), 3.3 (t, 2H,  $J$  = 6.4 Hz), 2.48-2.43 (m, 2H), 1.63 (br s, 1H) ppm;  $^{13}\text{C}$  NMR (100 MHz,  $\text{CDCl}_3$ ):  $\delta$  = 159.0, 132.3, 130.0, 127.2, 124.0, 114.0, 62.1, 55.3, 36.4 ppm; HRMS Calcd for  $\text{C}_{11}\text{H}_{14}\text{NaO}_2$ :  $[\text{M}+\text{Na}]^+$ , 201.0086. Found:  $m/z$  201.0081.

**1h, (*E*)-4-phenylbut-3-en-1-ol:**

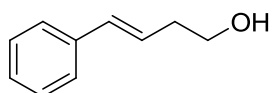

Colorless oil; 77% yield.  $^1\text{H}$  NMR (400 MHz,  $\text{CDCl}_3$ ):  $\delta$  = 7.20-7.38 (m, 5H), 6.50 (d, 1H,  $J$  = 16.0 Hz), 6.21 (dt, 1H,  $J$  = 7.2, 1.6 Hz), 3.75-3.78 (m, 2H), 2.47-2.52 (m, 2H), 1.55 (br s, 1H) ppm;  $^{13}\text{C}$  NMR (100 MHz,  $\text{CDCl}_3$ ):  $\delta$  = 137.2, 132.9, 128.6, 127.3, 126.3, 126.1, 62.0, 36.4 ppm; HRMS Calcd for  $\text{C}_{10}\text{H}_{12}\text{NaO}$ :  $[\text{M}+\text{Na}]^+$ , 171.0775. Found:  $m/z$  171.0779.

**1i, (*E*)-4-(2-chlorophenyl)but-3-en-1-ol:**

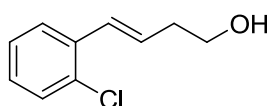

Colorless oil; 78% yield.  $^1\text{H}$  NMR (400 MHz,  $\text{CDCl}_3$ ):  $\delta$  = 7.50-7.52 (m, 1H), 7.32-7.34 (m, 1H), 7.15-7.20 (m, 2H), 6.87 (d, 1H,  $J$  = 8.0 Hz), 6.20 (dt, 1H,  $J$  = 7.2, 1.2 Hz), 3.75-3.78 (m, 2H), 2.50-2.55 (m, 2H), 1.78 (br s, 1H) ppm;  $^{13}\text{C}$  NMR (100 MHz,  $\text{CDCl}_3$ ):  $\delta$  = 135.4, 132.66, 129.6, 129.5, 128.9, 128.3, 126.8, 126.7, 62.0, 36.5 ppm; HRMS Calcd for  $\text{C}_{10}\text{H}_{11}\text{ClNaO}$ :  $[\text{M}+\text{Na}]^+$ , 205.0389. Found:  $m/z$  205.0381.

**1j, (*E*)-4-(3-chlorophenyl)but-3-en-1-ol:**

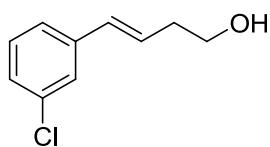

Colorless oil; 75% yield.  $^1\text{H}$  NMR (400 MHz,  $\text{CDCl}_3$ ):  $\delta$  = 7.33 (s, 1H), 7.15-7.21 (m, 3H), 6.40 (d, 1H,  $J$  = 16.0 Hz), 6.17-6.24 (m, 1H), 3.71-3.74 (m, 2H), 2.43-2.48 (m, 2H), 2.15 (br s, 1H) ppm;  $^{13}\text{C}$  NMR (100 MHz,  $\text{CDCl}_3$ ):  $\delta$  = 139.2, 134.5, 131.3, 129.8, 128.2, 127.2, 126.0, 124.4, 61.9, 36.3 ppm; HRMS Calcd for  $\text{C}_{10}\text{H}_{11}\text{ClNaO}$ :  $[\text{M}+\text{Na}]^+$ , 205.0391. Found:  $m/z$  205.0386.

**1k, (*E*)-4-(4-chlorophenyl)but-3-en-1-ol:**

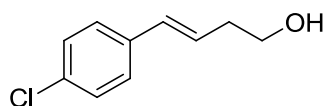

Colorless oil; 68% yield.  $^1\text{H}$  NMR (400 MHz,  $\text{CDCl}_3$ ):  $\delta$  = 7.25 (s, 4H), 6.39-6.44 (m, 1H), 6.17 (dt, 1H,  $J$  = 7.2, 1.6 Hz), 3.71-3.75 (m, 2H), 2.43-2.48 (m, 2H), 2.09 (br s, 1H) ppm;  $^{13}\text{C}$  NMR (100 MHz,  $\text{CDCl}_3$ ):  $\delta$  = 135.8, 132.8, 132.1, 131.4, 128.7, 127.3, 61.9, 36.4 ppm; HRMS Calcd for  $\text{C}_{10}\text{H}_{11}\text{ClNaO}$ :  $[\text{M}+\text{Na}]^+$ , 205.0385. Found:  $m/z$  205.0379.

**1l, (E)-4-(2,4-dichlorophenyl)but-3-en-1-ol:**

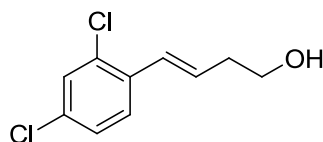

Colorless oil; 75% yield.  $^1\text{H}$  NMR (400 MHz,  $\text{CDCl}_3$ ):  $\delta$  = 7.43 (d, 1H,  $J$  = 8.8 Hz), 7.35 (d, 1H,  $J$  = 2.0 Hz), 7.16-7.18 (m, 1H), 6.79 (d, 1H,  $J$  = 15.6 Hz), 6.20 (dt, 1H,  $J$  = 7.2, 1.2 Hz), 3.76-3.79 (m, 2H), 2.49-2.55 (m, 2H), 1.76 (br s, 1H) ppm;  $^{13}\text{C}$  NMR (100 MHz,  $\text{CDCl}_3$ ):  $\delta$  = 134.0, 133.2, 131.2, 130.2, 129.4, 127.8, 127.4, 127.2, 61.9, 36.5 ppm; HRMS Calcd for  $\text{C}_{10}\text{H}_{10}\text{Cl}_2\text{NaO}$ :  $[\text{M}+\text{Na}]^+$ , 238.9991. Found:  $m/z$  238.9986.

**1m, (E)-4-(4-bromophenyl)but-3-en-1-ol:**

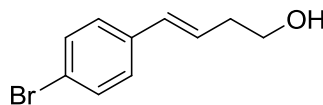

Yellow solid; 59% yield.  $^1\text{H}$  NMR (400 MHz,  $\text{CDCl}_3$ ):  $\delta$  = 7.40-7.42 (m, 2H), 7.20-7.22 (m, 2H), 6.42 (d, 1H,  $J$  = 16.0 Hz), 6.19 (dt, 1H,  $J$  = 7.2, 1.6 Hz), 3.73-3.76 (m, 2H), 2.44-2.49 (m, 2H), 1.74 (br s, 1H) ppm;  $^{13}\text{C}$  NMR (100 MHz,  $\text{CDCl}_3$ ):  $\delta$  = 136.2, 131.6, 131.5, 127.6, 127.4, 120.9, 61.9, 36.4 ppm; HRMS Calcd for  $\text{C}_{10}\text{H}_{11}\text{BrNaO}$ :  $[\text{M}+\text{Na}]^+$ , 248.9876. Found:  $m/z$  248.9885.

**1n, (E)-4-(4-fluorophenyl)but-3-en-1-ol:**

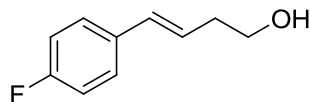

Colorless oil; 57% yield.  $^1\text{H}$  NMR (400 MHz,  $\text{CDCl}_3$ ):  $\delta$  = 7.13-7.20 (m, 2H), 6.83-6.87 (m, 2H), 6.32 (d, 1H,  $J$  = 16.0 Hz), 5.95-6.05 (m, 1H), 3.59-3.63 (m, 2H), 2.31-2.36 (m, 2H), 1.68 (br s, 1H) ppm;  $^{13}\text{C}$  NMR (100 MHz,  $\text{CDCl}_3$ ):  $\delta$  = 162.1 (d,  $J$  = 270.0 Hz), 133.4 (d,  $J$  = 4.0 Hz), 131.5, 127.6 (d,  $J$  = 8.0 Hz), 126.1, 115.5 (d,  $J$  = 21.0 Hz), 62.0, 36.3 ppm; HRMS Calcd for  $\text{C}_{10}\text{H}_{11}\text{FNaO}$ :  $[\text{M}+\text{Na}]^+$ , 189.0678. Found:  $m/z$  189.0674.

**1o, (E)-4-(2-(trifluoromethyl)phenyl)but-3-en-1-ol:**

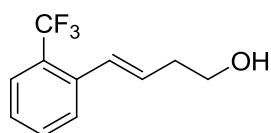

Colorless oil; 63% yield.  $^1\text{H}$  NMR (400 MHz,  $\text{CDCl}_3$ ):  $\delta$  = 7.61 (d, 2H,  $J$  = 8.4 Hz), 7.48 (d, 1H,  $J$  = 7.2 Hz), 7.33-7.36(m, 1H), 6.84-6.88(m, 1H), 6.17-6.24(m, 1H), 3.76-3.79 (m, 2H), 2.50-2.55 (m, 2H), 1.71 (br s, 1H) ppm;  $^{13}\text{C}$  NMR (100 MHz,  $\text{CDCl}_3$ ):  $\delta$  = 136.5 (d,  $J$  = 2.0 Hz), 131.8, 131.0 (d,  $J$  = 1.0 Hz), 130.3, 128.7 (d,  $J$  = 1.0 Hz), 127.3, 127.0, 125.7 (dd,  $J$  = 6.0, 2.0 Hz), 123.0, 61.9, 36.5 ppm; HRMS Calcd for  $\text{C}_{11}\text{H}_{11}\text{F}_3\text{NaO}$ :  $[\text{M}+\text{Na}]^+$ , 239.0645. Found:  $m/z$  239.0648.

**1p, (E)-4-(4-(trifluoromethyl)phenyl)but-3-en-1-ol:**

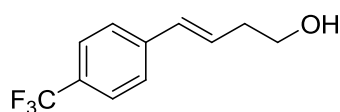

White solid; 60% yield.  $^1\text{H}$  NMR (400 MHz,  $\text{CDCl}_3$ ):  $\delta$  = 7.51 (d, 2H,  $J$  = 8.0 Hz), 7.39 (d, 2H,  $J$  = 8.0 Hz), 6.47 (d, 1H,  $J$  = 16.0 Hz), 6.30 (dt, 1H,  $J$  = 7.2, 1.5 Hz), 3.72-3.75 (m, 2H), 2.85 (s, br, 1H), 2.45-2.50 (m, 2H) ppm;  $^{13}\text{C}$  NMR (100 MHz,  $\text{CDCl}_3$ ):  $\delta$  = 140.8, 131.1, 129.6, 128.9 (t,  $J$  = 160.0 Hz), 126.2, 125.5 (q,  $J$  = 4.0 Hz), 122.94, 60.9, 36.3 ppm; HRMS Calcd for  $\text{C}_{11}\text{H}_{11}\text{F}_3\text{NaO}$ :  $[\text{M}+\text{Na}]^+$ , 239.0649. Found:  $m/z$  239.0645.

**1q, (E)-4-(3-nitrophenyl)but-3-en-1-ol:**

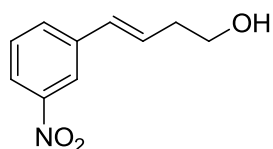

Yellow oil; 80% yield.  $^1\text{H}$  NMR (400 MHz,  $\text{CDCl}_3$ ):  $\delta$  = 8.14 (s, 1H), 8.05-8.07 (m, 1H), 7.63 (d, 1H,  $J$  = 7.2 Hz), 7.50(t, 1H,  $J$  = 8.0 Hz), 6.57 (d, 1H,  $J$  = 16.0 Hz), 5.85-5.91(m, 1H), 3.75-3.78 (m, 2H), 2.56-2.62 (m, 2H), 2.54 (s, 1H) ppm;  $^{13}\text{C}$  NMR (100 MHz,  $\text{CDCl}_3$ ):  $\delta$  = 148.1, 138.8, 134.8, 131.6, 129.2, 129.0, 123.3, 121.6, 61.9, 31.8 ppm; HRMS Calcd for  $\text{C}_{10}\text{H}_{11}\text{NNaO}_3$ :  $[\text{M}+\text{Na}]^+$ , 216.0628. Found:  $m/z$  216.0615.

**1r, (E)-4-cyclohexylbut-3-en-1-ol:**

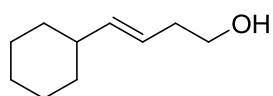

Colorless oil; 75% yield.  $^1\text{H}$  NMR (400 MHz,  $\text{CDCl}_3$ ):  $\delta$  = 5.53-5.23 (m, 2H), 3.62 (t, 2H,  $J$  = 6.4 Hz), 2.31-2.22 (m, 2H), 1.72-1.62 (m, 7H), 1.30-1.04 (m, 5H) ppm;  $^{13}\text{C}$  NMR (100 MHz,  $\text{CDCl}_3$ ):  $\delta$  = 140.4,

123.1, 62.0, 40.8, 36.0, 33.1, 31.0, 26.1 ppm; HRMS Calcd for  $C_{10}H_{18}NaO$ :  $[M+Na]^+$ , 177.1255. Found:  $m/z$  177.1249.

**1s, (*E*)-5,5-dimethylhex-3-en-1-ol:**

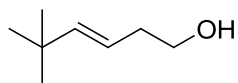

Colorless oil; 48% yield.  $^1H$  NMR (400 MHz,  $CDCl_3$ ):  $\delta$  = 5.46 (d, 1H,  $J$  = 12.0 Hz), 5.17-5.10 (m, 1H), 3.63 (t, 2H,  $J$  = 6.4 Hz), 2.49-2.43 (m, 2H), 1.79 (br, 1H), 1.10 (s, 9H) ppm;  $^{13}C$  NMR (100 MHz,  $CDCl_3$ ):  $\delta$  = 142.9, 123.8, 62.8, 36.0, 33.3, 31.8, 31.2, 29.7 ppm; HRMS Calcd for  $C_8H_{16}NaO$ :  $[M+Na]^+$ , 151.1099. Found:  $m/z$  151.1095.

**1t, (*Z*)-4-phenylbut-3-en-1-ol.<sup>9,10</sup>**

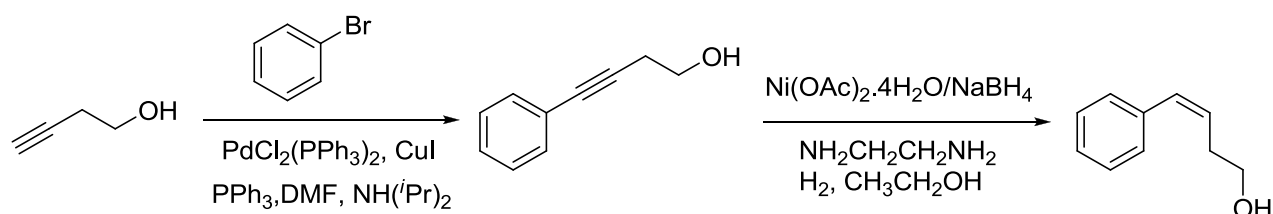

To a solution of bromobenzene (0.5 mL, 4.75 mmol), bis(triphenylphosphine) palladium (II) chloride (0.167 g, 0.23 mmol), triphenylphosphine (0.09 g, 0.34 mmol), and copper(I) iodide (0.01 g, 0.052 mmol) were added to a dry round-bottomed flask, which was then sparged with argon and charged with diethylamine (1 mL) and DMF (10 mL). 3-Butyn-1-ol (0.3 mL, 4.75 mmol) was added via syringe. The stirred reaction mixture was heated at 80 °C for 6 h. After it was cooled to room temperature, the reaction mixture was diluted with diethyl ether (30 mL), and filtered. The filtrate was poured into water and the aqueous layer was extracted with diethyl ether (20 mL x 3). The combined organic layer was dried ( $Na_2SO_4$ ) and the solvent was evaporated under reduced pressure. The product was isolated by chromatography on silica gel column (ethyl acetate / petroleum 1:3) to give an alkyne as a dark brown liquid (0.3 g, 43%).

To a solution of  $Ni(OAc)_2 \cdot H_2O$  (104 mg, 0.23 mmol) in EtOH (5 mL) under  $H_2$  atmosphere (1 bar) was added a solution of  $NaBH_4$  (16 mg, 1.67 mmol) in EtOH (1 mL) at room temperature. After being stirred for 1 h, a solution of alkyne (2.0 mmol) and ethylenediamine (80 mg, 1.46 mmol) in EtOH (2 mL) was added and the reaction was stirred overnight. Solvent was evaporated and the residue was purified by chromatography on silica gel column (ethyl acetate-petroleum 1:4) to give a colorless oil (0.2 g, 67%).  $^1H$  NMR (400 MHz,  $CDCl_3$ ):  $\delta$  = 7.20-7.34 (m, 5H), 6.58 (d, 1H,  $J$  = 12.0 Hz), 5.66-5.73 (m, 1H), 3.75 (m, 2H), 2.60-2.67 (m, 2H), 1.55 (br s, 1H) ppm;  $^{13}C$  NMR (100 MHz,  $CDCl_3$ ):  $\delta$  = 137.2, 131.6, 128.8, 128.3, 128.2, 126.8, 62.5, 32.0 ppm.

### 1u, (E)-5-*o*-tolylpent-4-en-1-ol

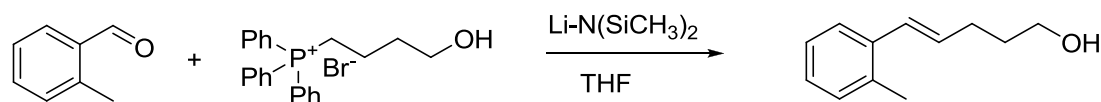

Colorless oil; 82% yield.  $^1\text{H}$  NMR (400 MHz,  $\text{CDCl}_3$ ):  $\delta$  = 7.12-7.20 (m, 5H), 6.47 (d, 1H,  $J$  = 11.6 Hz), 5.67- 5.74 (m, 1H), 3.58 (t, 2H,  $J$  = 6.4 Hz), 2.19-2.24 (m, 5H), 1.60-1.68 (m, 1H), 1.50 (br s, 1H) ppm;  $^{13}\text{C}$  NMR (100 MHz,  $\text{CDCl}_3$ ):  $\delta$  = 136.6, 136.3, 131.8, 129.9, 129.0, 128.7, 126.9, 125.4, 62.4, 32.7, 24.7, 19.9 ppm; HRMS Calcd for  $\text{C}_{12}\text{H}_{16}\text{NaO}$ :  $[\text{M}+\text{Na}]^+$ , 200.1085. Found:  $m/z$  200.1083.

## 2.2 General Procedure for the preparation of $\beta$ -chlorotetrahydrofuran 2a-u

To a solution of but-3-en-1-ol **1** (0.2 mmol, 1.0 equiv), catalyst **5g** (10.7 mg, 0.02 mmol, 0.1 equiv), and 4-methylbenzenesulfonamide (17.1 mg, 0.1 mmol, 0.5 equiv) in THF (1 mL) at  $-20^\circ\text{C}$  under argon atmosphere was added *N*-chlorosuccinimide (54 mg, 0.4 mmol, 2 equiv). The resulting mixture was stirred at  $-20^\circ\text{C}$  for 12 hours. The reaction was quenched with water at  $-20^\circ\text{C}$  and then was warmed to room temperature. The solution was extracted with  $\text{CH}_2\text{Cl}_2$  ( $3 \times 5$  mL). The combined extracts were washed with brine (5.0 mL), dried ( $\text{Na}_2\text{SO}_4$ ), filtered and concentrated *in vacuum*. The residue was purified by flash column chromatography (EtOAc/Petroleum = 1/20; v/v) to yield the corresponding products **2**.

## 2.3 Optimization of solvent, Cl-sources and additives.

**Table S1.** Screening reaction conditions.<sup>a</sup>

| Entry | Catalyst  | Solvent and Additive                               | Cl-Sources | Yield (%) <sup>b</sup> | ee (%) <sup>c</sup> |
|-------|-----------|----------------------------------------------------|------------|------------------------|---------------------|
| 1     | <b>5a</b> | $\text{CHCl}_3$                                    | I          | 75                     | 78                  |
| 2     | <b>5a</b> | $(\text{CH}_3\text{CH}_2)_2\text{O}$               | I          | 67                     | 80                  |
| 3     | <b>5a</b> | $\text{CH}_3\text{CN}$                             | I          | 65                     | 2                   |
| 4     | <b>5g</b> | $(^i\text{Pr})_2\text{O}+\text{TsNH}_2$            | I          | <5                     | n.d                 |
| 5     | <b>5g</b> | $(\text{CH}_3\text{CH}_2)_2\text{O}+\text{TsNH}_2$ | I          | 74                     | 80                  |
| 6     | <b>5g</b> | $(^n\text{Bu})_2\text{O}+\text{TsNH}_2$            | I          | <5                     | n.d                 |
| 7     | <b>5g</b> | $\text{CH}_3\text{OC}_6\text{H}_5+\text{TsNH}_2$   | I          | 89                     | 62                  |
| 8     | <b>5g</b> | $\text{THF}+\text{NsNH}_2$                         | I          | 82                     | 35                  |
| 9     | <b>5g</b> | $\text{THF}+^o\text{TsNH}_2$                       | I          | 72                     | 61                  |
| 10    | <b>5g</b> | $\text{THF}+\text{TsNH}_2$                         | II         | 80                     | 82                  |



|                 |           |                       |     |    |    |
|-----------------|-----------|-----------------------|-----|----|----|
| 11              | <b>5g</b> | THF+TsNH <sub>2</sub> | III | 86 | 10 |
| 12 <sup>d</sup> | -         | THF+TsNH <sub>2</sub> | I   | 87 | -  |

<sup>a</sup> The reactions were carried out with **1a** (0.20 mmol), NCS (0.24 mmol), additive (0.10 mmol) and catalyst (0.02 mmol) in solvent (1.0 mL) under argon atmosphere at -20 °C for 12 h. <sup>b</sup> Isolated yield. <sup>c</sup> Determined by HPLC. <sup>d</sup> The reaction was carried out with **1h** (0.20 mmol), NCS (0.24 mmol), additive (0.10 mmol) in THF under argon atmosphere at rt for 12 h.

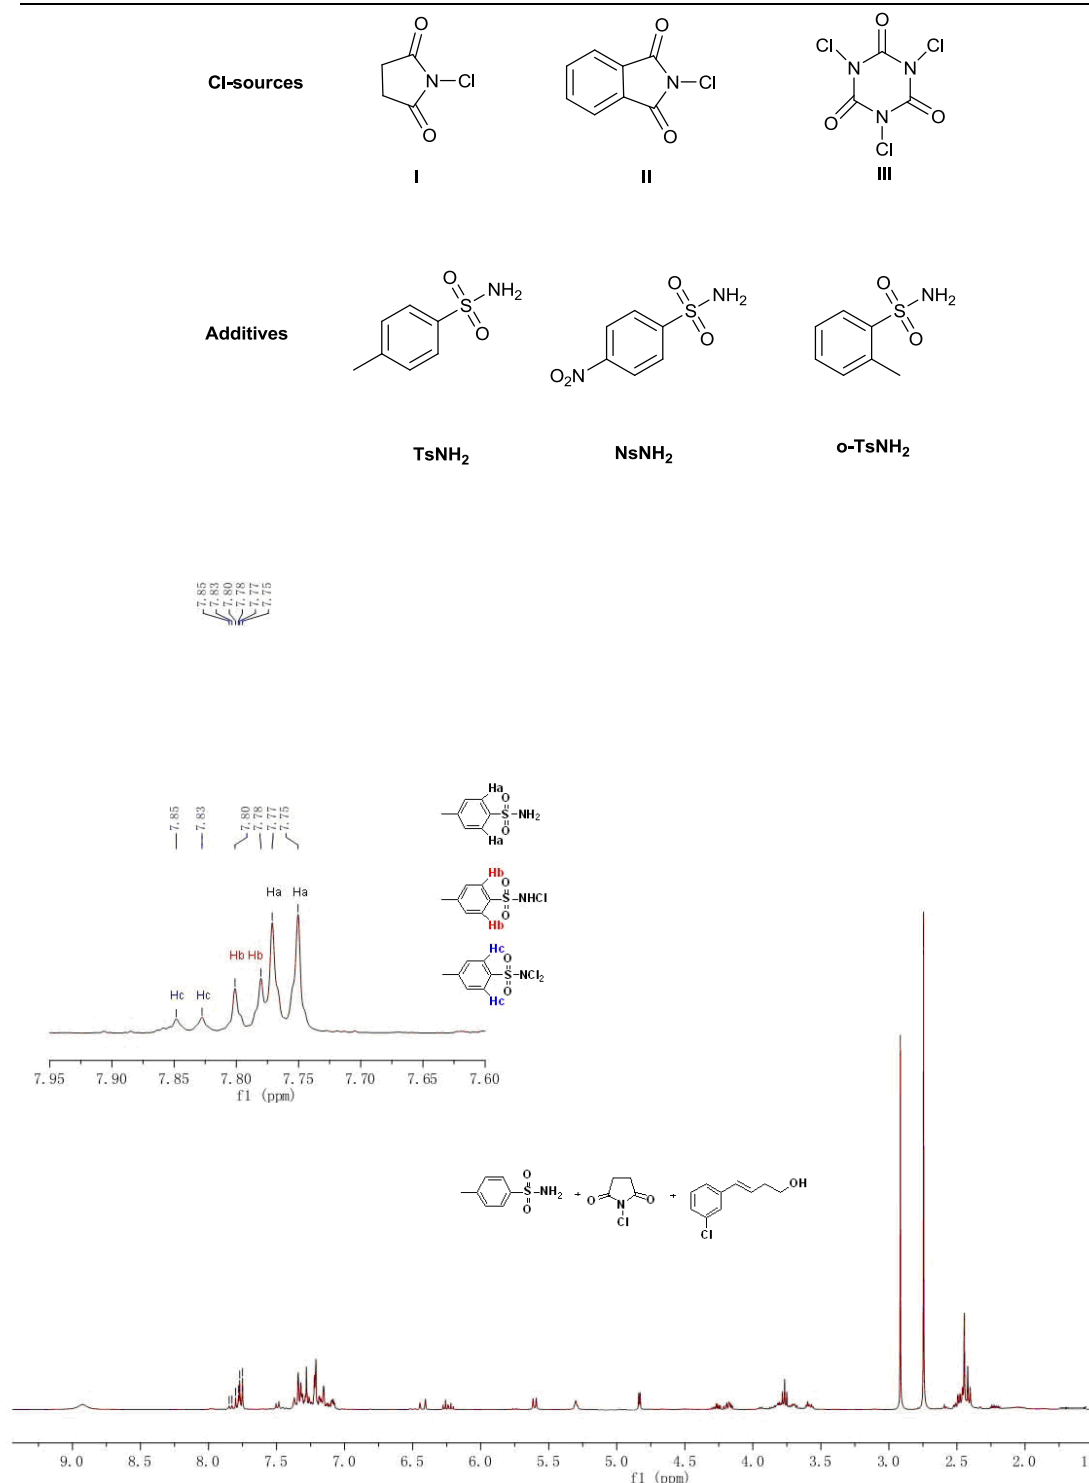

**Fig. S1.** The  $^1\text{H}$  NMR spectrum of the reaction mixture of NCS, substrate **1j** and  $\text{TsNH}_2$  in  $\text{CDCl}_3$  at room temperature for 6 h.

## 2.4 Absolute stereochemical determination of $\beta$ -chlorotetrahydrofurans

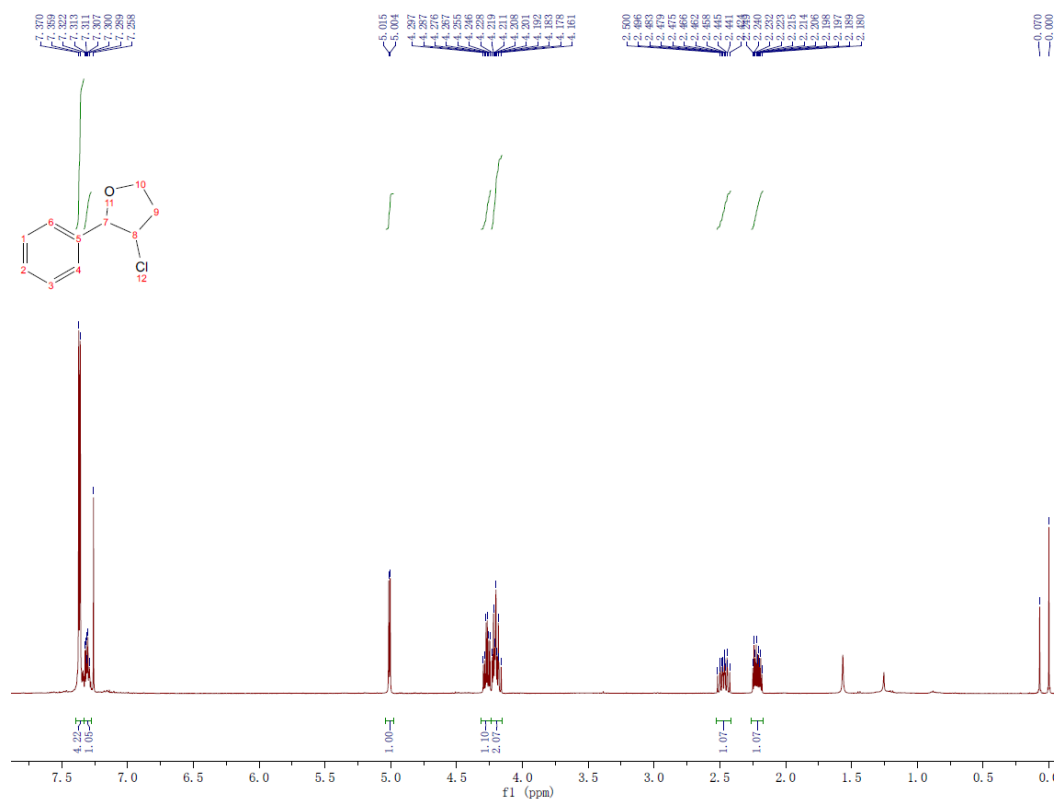

**Fig. S2.** The  $^1\text{H}$  NMR spectrum of *trans*-**2h** (racemic), which was synthesized from *trans*-2,3-dichlorotetrahydrofuran and  $\text{PhMgBr}$  in  $\text{Et}_2\text{O}$  at room temperature according to reported method.<sup>11</sup> The data is well in accord with the NMR of product **2h**.

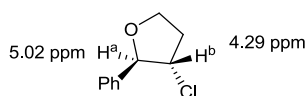

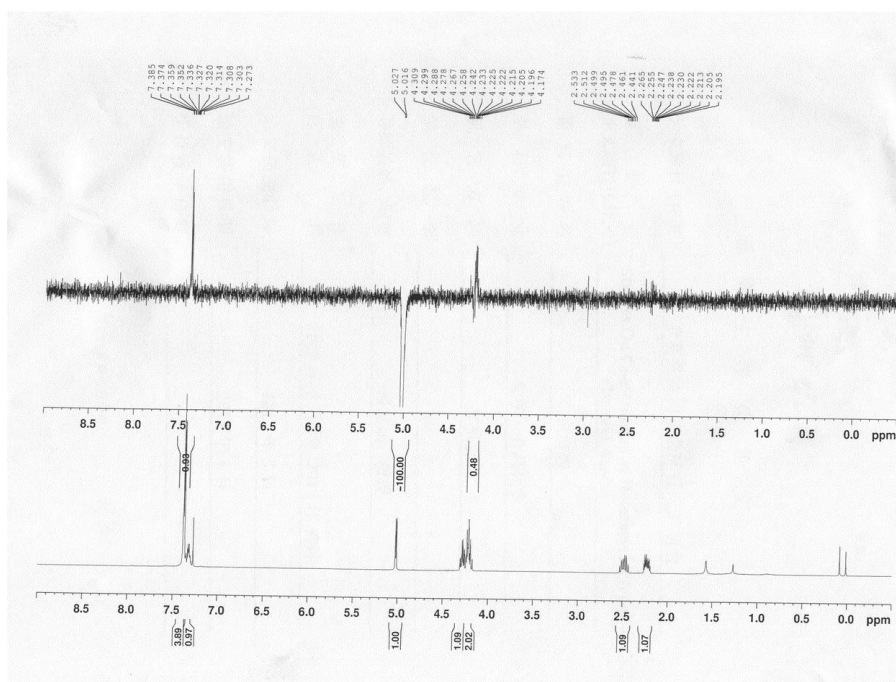

**Fig. S3.** NOE spectrum of the product **2h**. (There is no NOE between H<sup>a</sup> and H<sup>b</sup>.)

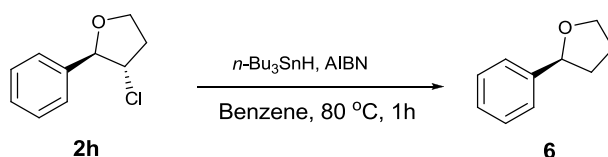

Under an argon atmosphere, AIBN (4 mg, 0.02 mmol, 0.1 equiv) was added to a refluxing solution of **2h** (37 mg, 0.2 mmol, 1 equiv, 92% ee) and tributyltin hydride (0.24 mmol, 1.2 equiv) in anhydrous benzene (3 mL). The resulting mixture was refluxed for 1 h. The solvent was removed by rotary evaporator and the residue was purified by column chromatography to yield the corresponding product **6**. Optical rotation analysis and the chiral GC retention time revealed the isolated **6** to be *S* configuration as previous report (  $[\alpha]_{20}^D = -2.3$  (c = 0.3, CHCl<sub>3</sub>)).<sup>12</sup> [Varian Capillary Column CP-Chirasil-Dex CB): carrier gas, N<sub>2</sub>; injection temperature, 250 °C; detector temperature, 280 °C; column temperature, 50 °C, ramp 10 °C / min to 170 °C, then hold 15 min.  $t_R$  = 13.72 min (minor, *R*-isomer), 13.84 min (major, *S*-isomer)]. These data together with NOE data indicate that product **2h** should be *2R,3S* configuration. The absolute stereochemistry of all other products was inferred by analogy.

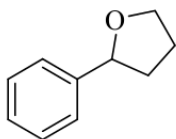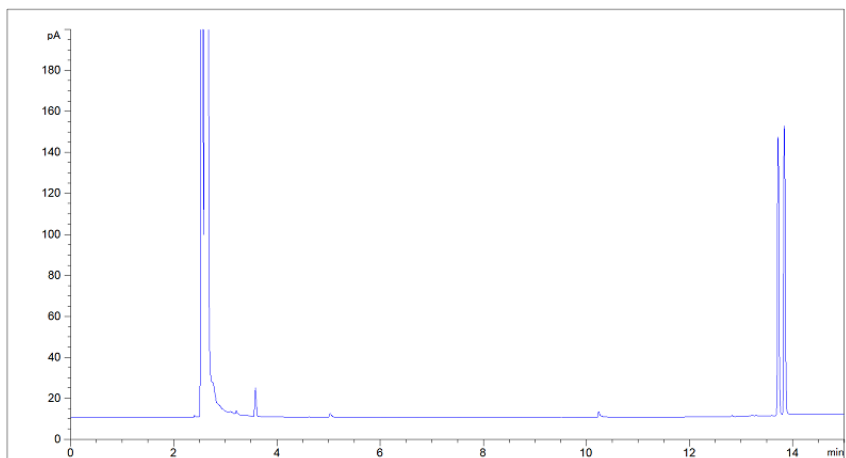

=====  
面积百分比报告  
=====

信号 1: FID1 A, 前部信号

| 峰 # | 保留时间 [min] | 类型 | 峰宽 [min] | 峰面积 [pA*s] | 峰高 [pA]   | 峰面积 %    |
|-----|------------|----|----------|------------|-----------|----------|
| 1   | 13.712     | BB | 0.0305   | 261.71057  | 135.60086 | 48.54818 |
| 2   | 13.833     | BB | 0.0301   | 277.36334  | 140.38293 | 51.45182 |

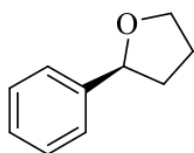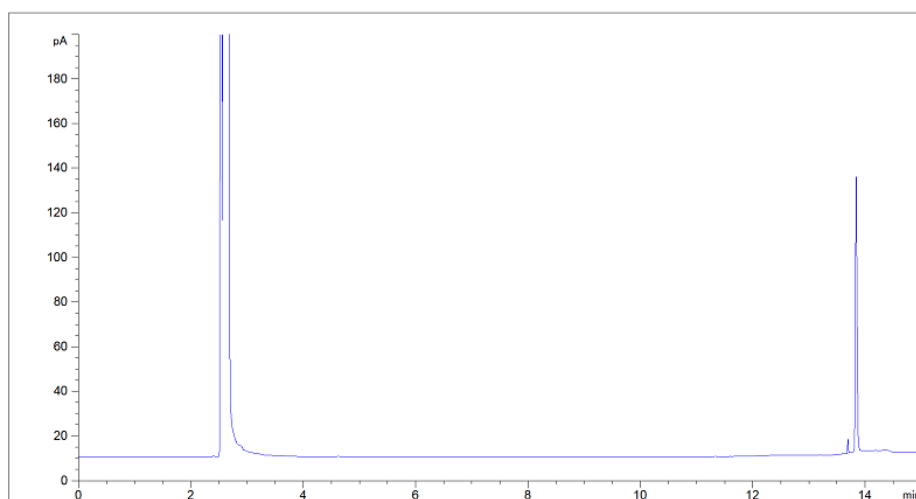

面积百分比报告

| 峰<br># | 保留时间<br>[min] | 类型   | 峰宽<br>[min] | 峰面积<br>[pA*s] | 峰高<br>[pA] | 峰面积<br>% |
|--------|---------------|------|-------------|---------------|------------|----------|
| 1      | 13.715        | MM T | 8.75e-3     | 10.12156      | 9.28815    | 4.09816  |
| 2      | 13.836        | BB   | 0.0295      | 236.85670     | 122.90540  | 95.90184 |

**Fig. S4.** GC analysis of **6**, Agilent 7890A GC, (Varian Capillary Column CP-Chirasil-Dex CB): carrier gas, N<sub>2</sub>; injection temp, 250 °C; detector temperature, 280 °C; column temperature, 50 °C, ramp 10 °C/min to 170 °C, then hold 15 min.

## 2.5 Mechanism studies

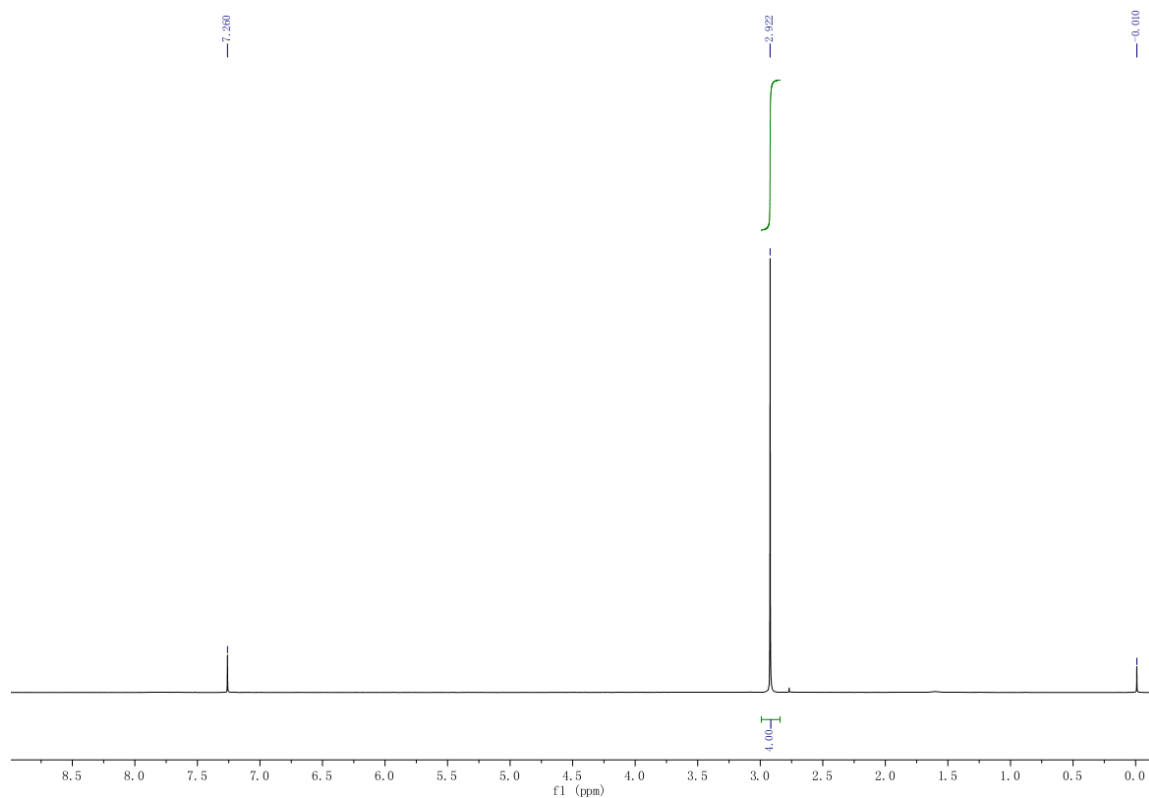

**Fig. S5.** <sup>1</sup>H NMR spectrum of NCS in CDCl<sub>3</sub>.

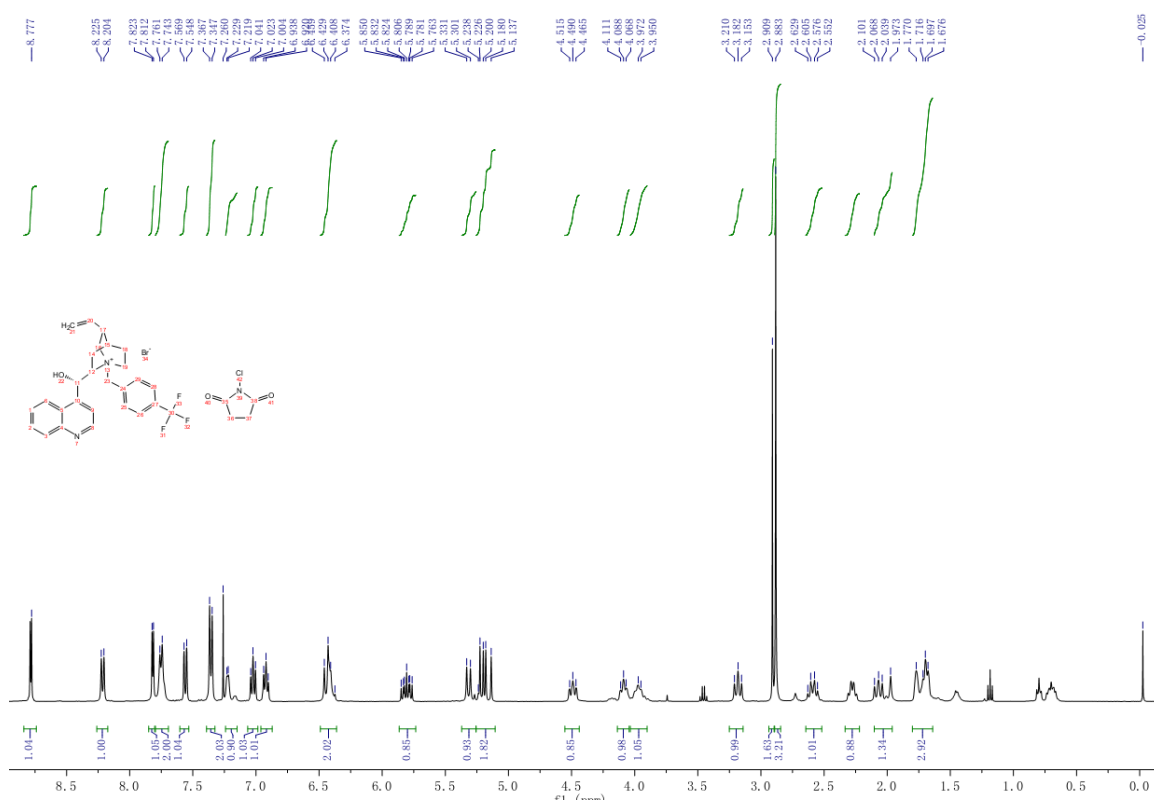

**Fig. S6.** <sup>1</sup>H NMR spectrum of NCS and **5g** (1:1) in CDCl<sub>3</sub>.

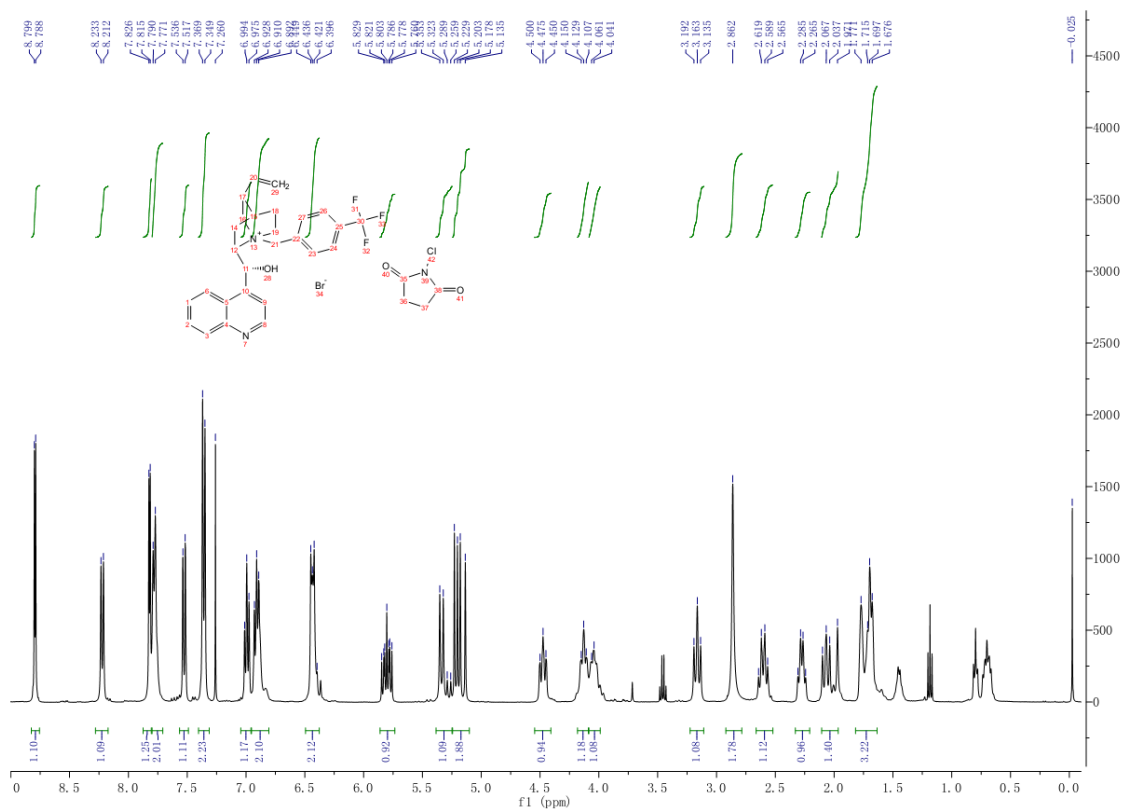

**Fig. S7.**  $^1\text{H}$  NMR spectrum of NCS and **5g** (1:2) in  $\text{CDCl}_3$ .

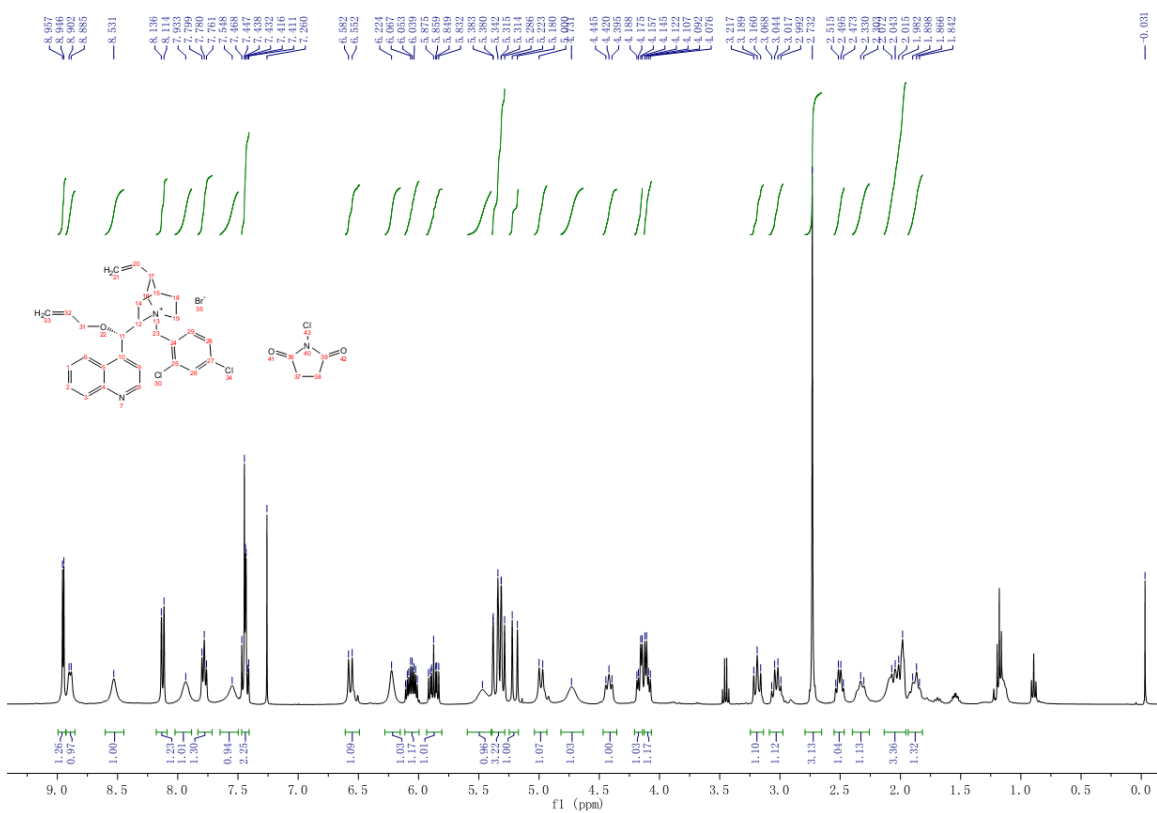

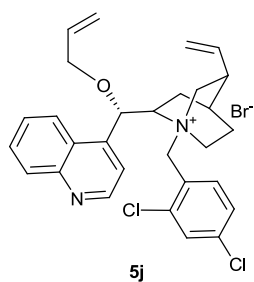

**Fig. S8.**  $^1\text{H}$  NMR spectrum of NCS and **5j** (1:1) in  $\text{CDCl}_3$  (The use of **5j** as catalyst for the the 5-*endo* chloroetherification of **1a** under the optimized conditions, only a 71% yield and 15% *ee* were observed).

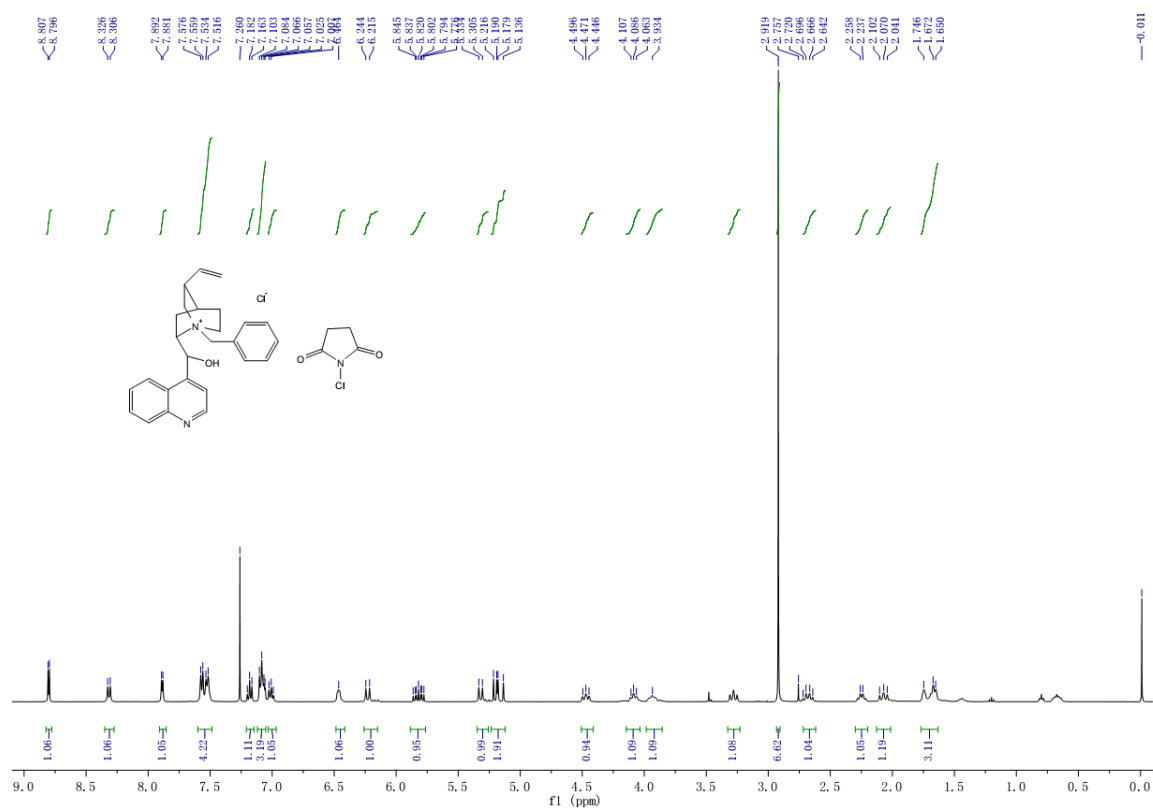

**Fig. S9.**  $^1\text{H}$  NMR spectrum of NCS and **5b** in  $\text{CDCl}_3$

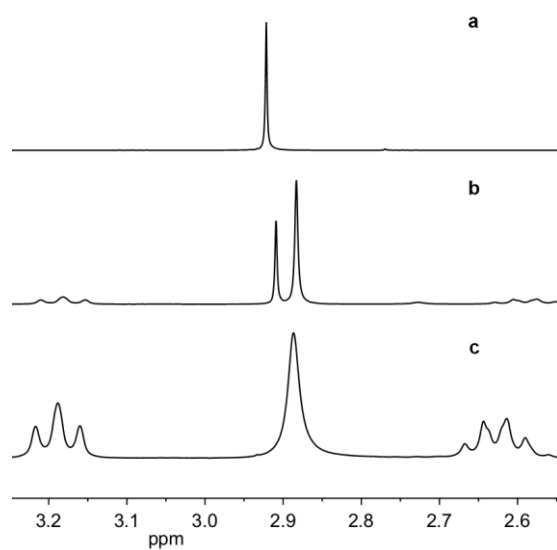



**Fig. S10**  $^1\text{H}$  NMR studies between NCS and catalyst **5g**: (a) NCS; (b) **5g** / NCS = 1; (c) **5g** / NCS = 2.

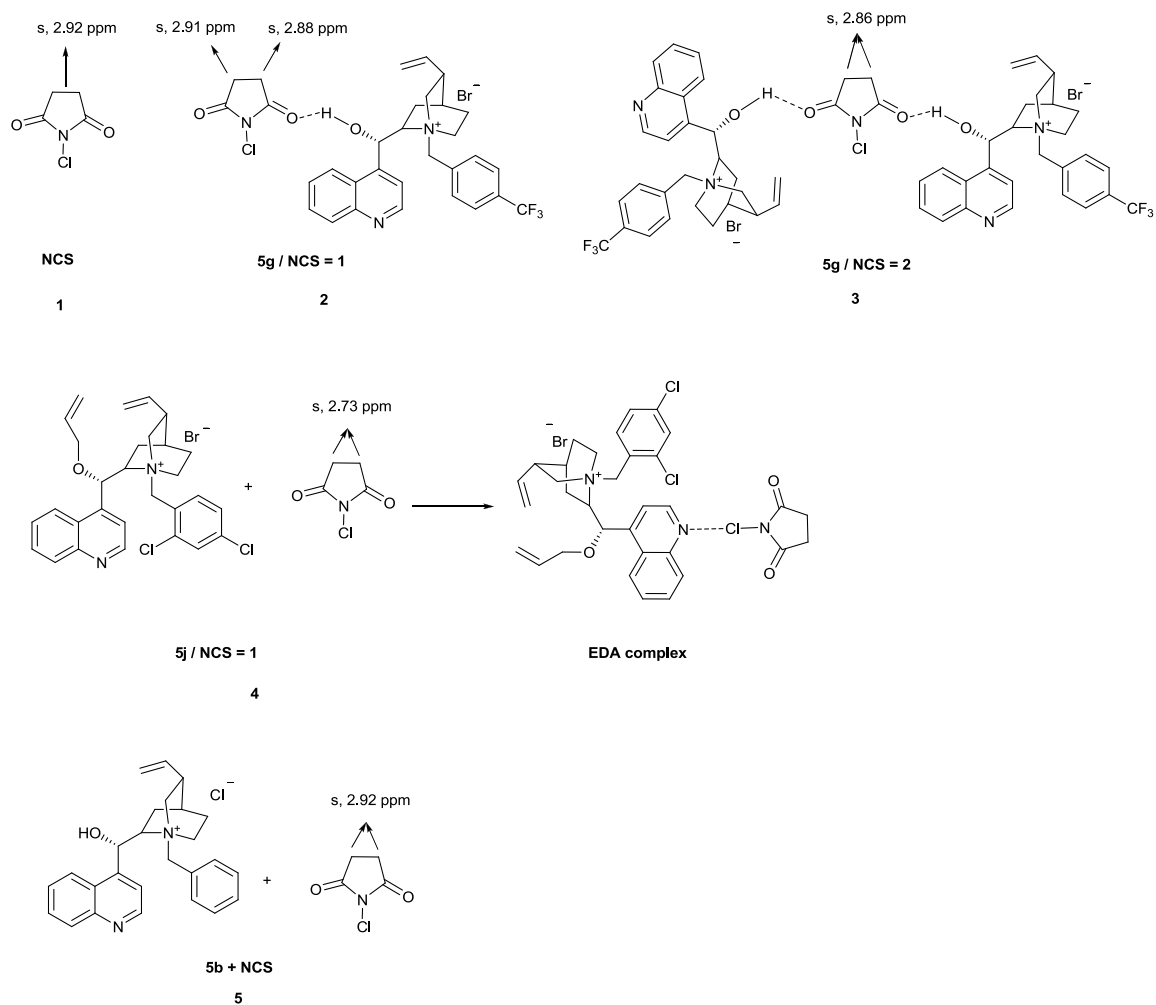

**Fig. S11** Proposed interaction between chiral quaternary ammonium salts and NCS.

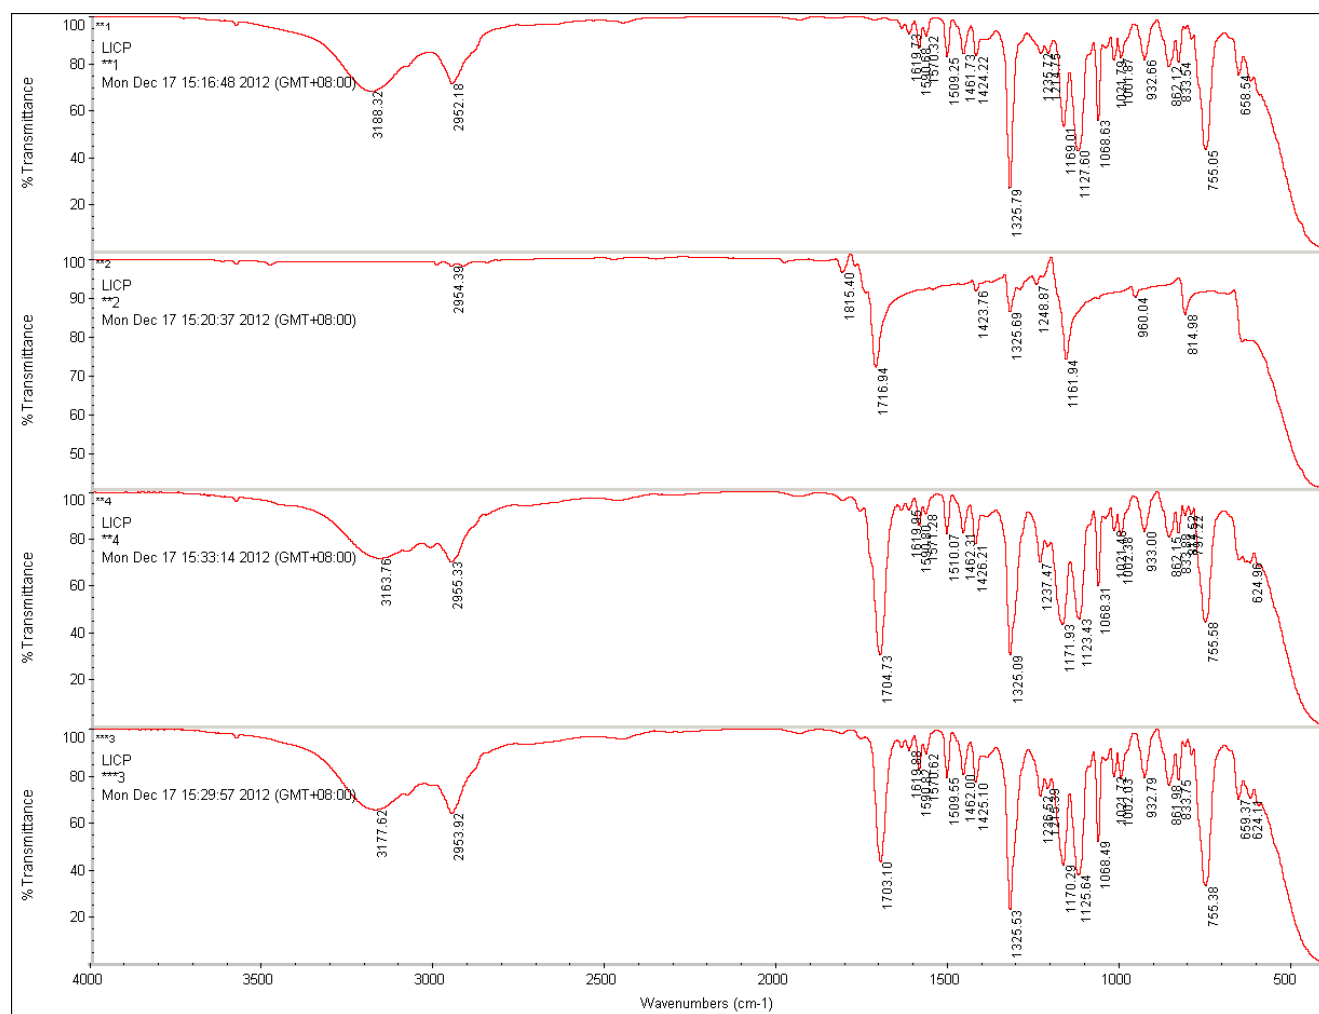

**Fig. S12** (1) Catalyst **5g**; (2) NCS; (3) **5g** / NCS = 1; (c) **5g** / NCS = 2.

In order to gain a better understanding of the reaction mechanism, we performed NMR studies while monitoring the reaction. Indeed, we were able to observe an association between NCS and the catalyst **5g** in a stoichiometric <sup>1</sup>H NMR experiment (Fig. S10). Two peaks appear at 2.91 ppm and 2.88 ppm when the equal molar of **5g** and NCS are added in CDCl<sub>3</sub> (Fig. S10b). It may indicate that the HB between one of the oxygen of the imide and OH of the catalyst is formed. We next examined the <sup>1</sup>H NMR spectra of **5g** and NCS (with a molar ratio of 2:1) in CDCl<sub>3</sub> (Fig. S10c), only the resonance for the protons of NCS shifted upfield from δ 2.92 to 2.86 ppm. This observation shows the existence of HB between the OH of the catalyst and both O of NCS. With a cinchona quaternary ammonium salt **5j** containing the *O*-allyl group in equal molar with NCS in CDCl<sub>3</sub>, only the resonance for the protons of NCS significantly shifted upfield from δ 2.92 to 2.73 ppm. This result suggests that an electron-donor–acceptor (EDA) complex may be formed (Fig. S11, Scheme 4). Employing **5j** as catalyst in the 5-*endo* chloroetherification of **1a**, only 15% *ee* was observed. Based on these findings, we suggest the possible mechanism may involve a hydrogen bond mediated association between the catalyst and the chloronium

source (Fig. S12). On the other hand, the chiral ion pair of the quaternary ammonium salt may play a key role for the activation of homoallylic alcohol substrate.

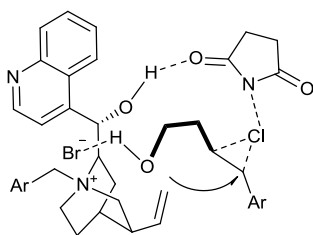

**Fig. S12 Plausible reaction models for the 5-*endo* enantioselective chloroetherification.**

## 2.6 Analytical data for $\beta$ -chlorotetrahydrofurans

### 2a, 3-chloro-2-*o*-tolyltetrahydrofuran

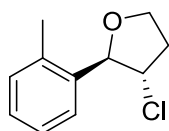

Colorless oil, 88% yield, 86% ee [Daicel CHIRALCEL OD-H (0.46 cm x 25 cm); hexane/2-propanol = 90/10; flow rate = 0.6 mL/min; detection wavelength = 254 nm;  $t_R$  = 10.98 (major), 11.79 (minor) min].  $[\alpha]_D^{20}$  = +30.5 ( $c$  = 0.27,  $\text{CHCl}_3$ ).  $^1\text{H}$  NMR (400 MHz,  $\text{CDCl}_3$ ):  $\delta$  = 7.32-7.34 (m, 1H), 7.16-7.21 (m, 3H), 5.30 (d, 1H,  $J$  = 4.0 Hz), 4.35-4.40 (m, 1H), 4.22-4.29 (m, 2H), 2.35-2.43 (m, 4H), 2.15-2.21 (m, 1H) ppm;  $^{13}\text{C}$  NMR (100 MHz,  $\text{CDCl}_3$ ):  $\delta$  = 138.9, 134.9, 130.5, 127.8, 126.1, 124.9, 86.5, 67.7, 63.2, 35.1, 19.5 ppm; HRMS Calcd for  $\text{C}_{11}\text{H}_{13}\text{ClNaO}$ :  $[\text{M}+\text{Na}]^+$ , 219.0547. Found:  $m/z$  219.0537.

### 2b, 3-chloro-2-*m*-tolyltetrahydrofuran

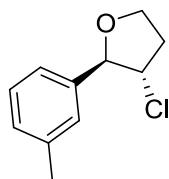

Colorless oil, 81% yield, 92% ee [Daicel CHIRALCEL OD-H (0.46 cm x 25 cm); hexane/2-propanol = 90/10; flow rate = 0.6 mL/min; detection wavelength = 254 nm;  $t_R$  = 11.26 (major), 11.92 (minor) min].  $[\alpha]_D^{20}$  = -5.2 ( $c$  = 0.2,  $\text{CHCl}_3$ ).  $^1\text{H}$  NMR (400 MHz,  $\text{CDCl}_3$ ):  $\delta$  = 7.16-7.19 (m, 1H), 7.03-7.10 (m, 3H), 4.91 (d, 1H,  $J$  = 4.4 Hz), 4.17-4.22 (m, 1H), 4.08-4.16 (m, 2H), 2.35-2.45 (m, 1H), 2.29(s, 3H), 2.10-2.17(m, 1H) ppm;  $^{13}\text{C}$  NMR (100 MHz,  $\text{CDCl}_3$ ):  $\delta$  = 138.9, 137.2, 127.8, 127.4, 125.2, 121.6, 87.30, 66.3, 62.2, 34.6, 20.4 ppm; HRMS Calcd for  $\text{C}_{11}\text{H}_{13}\text{ClNaO}$ :  $[\text{M}+\text{Na}]^+$ , 219.0550. Found:  $m/z$  219.0546.

### 2c, 3-chloro-2-*p*-tolyltetrahydrofuran

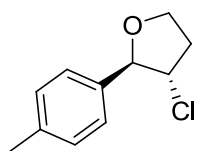

Colorless oil, 78% yield, 90% ee [Daicel CHIRALCEL OD-H (0.46 cm x 25 cm); hexane/2-propanol = 99/1; flow rate = 0.8 mL/min; detection wavelength = 254 nm;  $t_R$  = 13.43 (minor), 15.21 (major) min].  $[\alpha]_D^{20}$  = +15.7 ( $c$  = 0.34,  $\text{CHCl}_3$ ).  $^1\text{H}$  NMR (400 MHz,  $\text{CDCl}_3$ ):  $\delta$  = 7.18 (d, 2H,  $J$  = 8.0 Hz), 7.09 (d, 2H,  $J$  = 4.0 Hz), 4.89 (d, 1H,  $J$  = 4.4 Hz), 4.15-4.21 (m, 1H), 4.07-4.13 (m, 2H), 2.35-2.4 (m, 1H), 2.27 (s, 1H), 2.10-2.17 (m, 1H) ppm;  $^{13}\text{C}$  NMR (100 MHz,  $\text{CDCl}_3$ ):  $\delta$  = 136.7, 135.9, 128.2, 124.5, 87.2, 66.2, 62.2, 34.6, 20.1 ppm; HRMS Calcd for  $\text{C}_{11}\text{H}_{13}\text{ClNaO}$ :  $[\text{M}+\text{Na}]^+$ , 219.0550. Found:  $m/z$  219.0545.

## 2d, 3-chlorotetrahydrofuran-2-yl)phenol

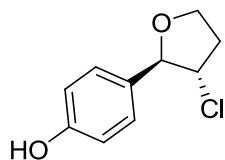

Colorless oil, 80% yield, 63% ee [Daicel CHIRALCEL OD-H (0.46 cm x 25 cm); hexane/2-propanol = 90/10; flow rate = 0.8 mL/min; detection wavelength = 254 nm;  $t_R$  = 9.93 (minor), 15.77 (major) min].  $[\alpha]_D^{20}$  = -6.2 ( $c$  = 0.2,  $\text{CHCl}_3$ ).  $^1\text{H}$  NMR (400 MHz,  $\text{CDCl}_3$ ):  $\delta$  = 7.23 (m, 2H), 7.19 (s, 2H), 5.78 (s, 1H), 4.77 (d, 1H,  $J$  = 4.4 Hz), 4.15-4.20 (m, 1H), 4.06-4.12 (m, 1H), 4.01-4.05 (m, 1H), 2.35-2.44 (m, 1H), 2.12-2.19 (m, 1H) ppm;  $^{13}\text{C}$  NMR (100 MHz,  $\text{CDCl}_3$ ):  $\delta$  = 147.5, 133.4, 130.9, 128.9, 125.5, 121.2, 86.7, 67.3, 62.6, 35.6 ppm; HRMS Calcd for  $\text{C}_{10}\text{H}_{11}\text{ClNaO}_2$ :  $[\text{M}+\text{Na}]^+$ , 221.0324. Found:  $m/z$  221.0319.

## 2e, 3-chloro-2-(2-methoxyphenyl)tetrahydrofuran

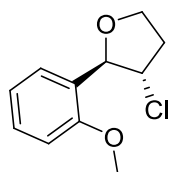

Colorless oil, 87% yield, 77% ee [Daicel CHIRALPAK AD-H (0.46 cm x 25 cm); hexane/2-propanol = 99/1; flow rate = 0.8 mL/min; detection wavelength = 254 nm;  $t_R$  = 14.98 (major), 16.82 (minor) min].  $[\alpha]_D^{20}$  = -20.2 ( $c$  = 0.25,  $\text{CHCl}_3$ ).  $^1\text{H}$  NMR (400 MHz,  $\text{CDCl}_3$ ):  $\delta$  = 7.25-7.32 (m, 2H), 6.93-6.97 (m, 1H), 6.87 (d, 1H,  $J$  = 8.0 Hz), 5.38 (s, 1H), 4.42-4.44 (m, 1H), 4.25-4.36 (m, 2H), 3.87 (s, 1H), 2.23-2.33 (m, 1H), 2.10-2.16 (m, 1H) ppm;  $^{13}\text{C}$  NMR (100 MHz,  $\text{CDCl}_3$ ):  $\delta$  = 156.2, 129.1, 128.9, 126.2, 120.5, 110.2, 84.9, 67.5, 63.2, 55.4, 34.7 ppm; HRMS Calcd for  $\text{C}_{11}\text{H}_{13}\text{ClNaO}_2$ :  $[\text{M}+\text{Na}]^+$ , 235.0589. Found:  $m/z$  235.0585.

## 2f, 3-chloro-2-(3-methoxyphenyl)tetrahydrofuran

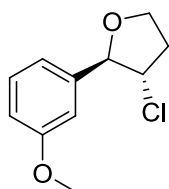

Colorless oil, 90% yield, 75% ee [Daicel CHIRALPAK AD-H (0.46 cm x 25 cm); hexane/2-propanol = 99/1; flow rate = 0.8 mL/min; detection wavelength = 254 nm;  $t_R$  = 24.76 (major), 25.66 (minor) min].  $[\alpha]_D^{20}$  = -10.7 ( $c$  = 0.2,  $\text{CHCl}_3$ ).  $^1\text{H}$  NMR (400 MHz,  $\text{CDCl}_3$ ):  $\delta$  = 7.19-7.23 (m, 1H), 6.85-6.89 (m, 2H), 6.76 (dd, 1H,  $J$  = 8.0 Hz), 4.93 (d, 1H,  $J$  = 4.0 Hz), 4.11-4.22 (m, 3H), 3.75 (s, 1H), 2.34-2.44 (m, 1H), 2.11-2.16 (m, 1H) ppm;  $^{13}\text{C}$  NMR (100 MHz,  $\text{CDCl}_3$ ):  $\delta$  = 159.8, 141.7, 129.6, 117.8, 113.4, 111.1, 88.1, 67.3, 63.2, 55.3, 35.6 ppm; HRMS Calcd for  $\text{C}_{11}\text{H}_{13}\text{ClNaO}_2$ :  $[\text{M}+\text{Na}]^+$ , 235.0591. Found:  $m/z$  235.0587.

### 2g, 3-chloro-2-(4-methoxyphenyl)tetrahydrofuran

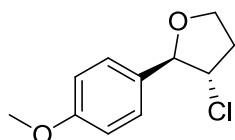

Colorless oil, 90% yield, 61% ee [Daicel CHIRALPAK OD-H (0.46 cm x 25 cm); hexane/2-propanol = 99/1; flow rate = 0.8 mL/min; detection wavelength = 254 nm;  $t_R$  = 16.31 (minor), 17.07 (major) min].  $[\alpha]_D^{20}$  = -16.2 ( $c$  = 0.2,  $\text{CHCl}_3$ ).  $^1\text{H}$  NMR (400 MHz,  $\text{CDCl}_3$ ):  $\delta$  = 7.28 (d, 2H,  $J$  = 8.4 Hz), 6.88 (dd, 2H,  $J$  = 4.8, 2.0 Hz), 4.92 (d, 1H,  $J$  = 4.4 Hz), 4.17-4.19 (m, 1H), 4.14-4.16 (m, 3H), 3.80 (s, 3H), 2.43-2.52 (m, 1H), 2.11-2.16 (m, 1H) ppm;  $^{13}\text{C}$  NMR (100 MHz,  $\text{CDCl}_3$ ):  $\delta$  = 158.4, 130.8, 125.8, 112.9, 86.9, 66.1, 62.1, 54.3, 34.6 ppm; HRMS Calcd for  $\text{C}_{11}\text{H}_{13}\text{ClNaO}_2$ :  $[\text{M}+\text{Na}]^+$ , 235.0591. Found:  $m/z$  235.0589.

### 2h, 3-chloro-2-phenyltetrahydrofuran

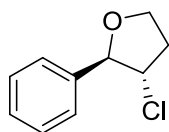

Colorless oil, 85% yield, 95% ee [Daicel CHIRALPAK AD-H (0.46 cm x 25 cm); hexane/2-propanol = 90/10; flow rate = 0.7 mL/min; detection wavelength = 254 nm;  $t_R$  = 9.62 (minor), 10.27 (major) min].  $[\alpha]_D^{20}$  = -25.1 ( $c$  = 0.2,  $\text{CHCl}_3$ ).  $^1\text{H}$  NMR (400 MHz,  $\text{CDCl}_3$ ):  $\delta$  = 7.36-7.37 (m, 4H), 7.29-7.32 (m, 1H), 5.01 (d, 1H,  $J$  = 4.4 Hz), 4.24-4.31 (m, 1H), 4.13-4.26 (m, 2H), 2.43-2.52 (m, 1H), 2.18-2.25 (m, 1H) ppm;  $^{13}\text{C}$  NMR (100 MHz,  $\text{CDCl}_3$ ):  $\delta$  = 140.0, 128.5, 128.0, 125.6, 88.3, 67.3, 63.2, 35.6 ppm; HRMS Calcd for  $\text{C}_{10}\text{H}_{11}\text{ClNaO}$ :  $[\text{M}+\text{Na}]^+$ , 205.0391. Found:  $m/z$  205.0388.

### 2i, 3-chloro-2-(2-chlorophenyl)tetrahydrofuran

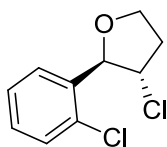

Colorless oil, 85% yield, 96% ee [Daicel CHIRALCEL OD-H (0.46 cm x 25 cm); hexane/2-propanol = 99/1; flow rate = 0.8 mL/min; detection wavelength = 254 nm;  $t_R$  = 13.72 (major), 15.31 (minor) min].  $[\alpha]_D^{20}$  = -15.0 ( $c$  = 0.33,  $\text{CHCl}_3$ ).  $^1\text{H}$  NMR (400 MHz,  $\text{CDCl}_3$ ):  $\delta$  = 7.28-7.35 (m, 2H), 7.16-7.21 (m, 2H), 5.39 (s, 1H), 4.31-4.37 (m, 2H), 4.22-4.28 (m, 1H), 2.16-2.26 (m, 1H), 2.07-2.13 (m, 1H) ppm;  $^{13}\text{C}$  NMR (100 MHz,  $\text{CDCl}_3$ ):  $\delta$  = 137.5, 131.0, 128.6, 128.1, 125.9, 125.9, 85.4, 67.1, 62.0, 33.4 ppm; HRMS Calcd for  $\text{C}_{10}\text{H}_{10}\text{Cl}_2\text{NaO}$ :  $[\text{M}]^+$ , 239.0007. Found:  $m/z$  239.0004.

## 2j, 3-chloro-2-(3-chlorophenyl)tetrahydrofuran

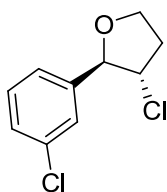

Colorless oil, 78% yield, 95% ee [Daicel CHIRALCEL OD-H (0.46 cm x 25 cm); hexane/2-propanol = 99/1; flow rate = 0.8 mL/min; detection wavelength = 254 nm;  $t_R$  = 12.50 (minor), 14.19 (major) min].  $[\alpha]_D^{20}$  = +10.6 ( $c$  = 0.2,  $\text{CHCl}_3$ ).  $^1\text{H}$  NMR (400 MHz,  $\text{CDCl}_3$ ):  $\delta$  = 7.38 (s, 1H), 7.26-7.28 (m, 3H), 4.96 (d, 1H,  $J$  = 4.4 Hz), 4.24-4.29 (m, 1H), 4.15-4.22 (m, 2H), 2.41-2.51 (m, 1H), 2.20-2.25 (m, 1H) ppm;  $^{13}\text{C}$  NMR (100 MHz,  $\text{CDCl}_3$ ):  $\delta$  = 142.1, 134.6, 129.8, 128.2, 125.7, 123.8, 87.5, 67.4, 62.9, 35.6 ppm; HRMS Calcd for  $\text{C}_{10}\text{H}_{10}\text{Cl}_2\text{NaO}$ :  $[\text{M}+\text{Na}]^+$ , 238.9998. Found:  $m/z$  238.9995.

## 2k, 3-chloro-2-(4-chlorophenyl)tetrahydrofuran

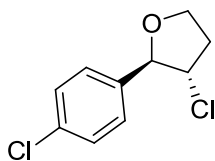

Colorless oil, 80% yield, 96% ee [Daicel CHIRALCEL OD-H (0.46 cm x 25 cm); hexane/2-propanol = 90/10; flow rate = 0.6 mL/min; detection wavelength = 254 nm;  $t_R$  = 13.84 (major), 15.18 (minor) min].  $[\alpha]_D^{20}$  = -4.8 ( $c$  = 0.5,  $\text{CHCl}_3$ ).  $^1\text{H}$  NMR (400 MHz,  $\text{CDCl}_3$ ):  $\delta$  = 7.30-7.35 (m, 4H), 4.94 (d, 1H,  $J$  = 4.4 Hz), 4.18-4.27 (m, 1H), 4.11-4.17 (m, 2H), 2.42-2.51 (m, 1H), 2.19-2.26 (m, 1H) ppm;  $^{13}\text{C}$  NMR (100 MHz,  $\text{CDCl}_3$ ):  $\delta$  = 138.4, 133.9, 128.7, 127.0, 87.5, 67.3, 62.8, 35.6 ppm; HRMS Calcd for  $\text{C}_{10}\text{H}_{10}\text{Cl}_2\text{NaO}$ :  $[\text{M}+\text{Na}]^+$ , 238.9998. Found:  $m/z$  238.9996

## 2l, 3-chloro-2-(2,4-dichlorophenyl)tetrahydrofuran

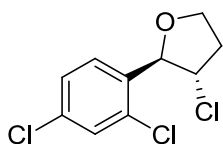

Colorless oil, 87% yield, 52% ee [Daicel CHIRALPAK AD-H (0.46 cm x 25 cm); hexane/2-propanol = 90/10; flow rate = 0.6 mL/min; detection wavelength = 254 nm;  $t_R$  = 17.08(major), 18.25 (minor) min].  $[\alpha]_D^{20}$  = -15.1 ( $c$  = 0.2,  $\text{CHCl}_3$ ).  $^1\text{H}$  NMR (400 MHz,  $\text{CDCl}_3$ ):  $\delta$  = 7.26-7.31 (m, 1H), 7.17-7.19 (m, 1H), 5.32 (s, 1H), 4.29-4.34 (m, 2H), 4.26-4.26 (m, 1H), 2.08-2.19 (m, 2H) ppm;  $^{13}\text{C}$  NMR (100 MHz,  $\text{CDCl}_3$ ):  $\delta$  = 137.2, 134.3, 132.7, 129.4, 127.9, 127.2, 86.0, 68.1, 62.7, 34.5 ppm; HRMS Calcd for  $\text{C}_{10}\text{H}_9\text{Cl}_3\text{NaO}$ :  $[\text{M}+\text{Na}]^+$ , 272.9609. Found:  $m/z$  272.9605.

### 2m, 3-chloro-2-(4-bromophenyl)tetrahydrofuran

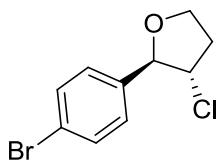

Colorless oil, 82% yield, 75% ee [Daicel CHIRALPAK AD-H (0.46 cm x 25 cm); hexane/2-propanol = 99/1; flow rate = 0.8 mL/min; detection wavelength = 254 nm;  $t_R$  = 14.79 (major), 16.68 (minor) min].  $[\alpha]_D^{20}$  = +7.5 ( $c$  = 0.4,  $\text{CHCl}_3$ ).  $^1\text{H}$  NMR (400 MHz,  $\text{CDCl}_3$ ):  $\delta$  = 7.48-7.50 (m, 2H), 7.25-7.27 (m, 2H), 4.92 (d, 1H,  $J$  = 4.4 Hz), 4.18-4.27 (m, 1H), 4.10-4.17 (m, 2H), 2.41-2.50 (m, 1H), 2.18-2.25 (m, 1H) ppm;  $^{13}\text{C}$  NMR (100 MHz,  $\text{CDCl}_3$ ):  $\delta$  = 138.9, 131.7, 127.3, 122.0, 87.5, 67.3, 62.8, 35.6 ppm; HRMS Calcd for  $\text{C}_{10}\text{H}_{10}\text{BrClNaO}$ :  $[\text{M}+\text{Na}]^+$ , 239.9489. Found:  $m/z$  282.9481.

### 2n, 3-chloro-2-(4-fluorophenyl)tetrahydrofuran

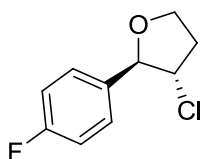

Colorless oil, 83% yield, 71% ee [Daicel CHIRALPAK AD-H (0.46 cm x 25 cm); hexane/2-propanol = 98/2; flow rate = 0.5 mL/min; detection wavelength = 254 nm;  $t_R$  = 13.01 (major), 16.86(minor) min].  $[\alpha]_D^{20}$  = -2.2 ( $c$  = 0.5,  $\text{CHCl}_3$ ).  $^1\text{H}$  NMR (400 MHz,  $\text{CDCl}_3$ ):  $\delta$  = 7.33-7.35 (m, 2H), 7.03-7.07 (m, 2H), 4.94 (d, 1H,  $J$  = 8.0 Hz), 4.20-4.38 (m, 1H), 4.22-4.29 (m, 2H), 4.11-4.18 (m, 2H), 2.43-2.53 (m, 1H), 2.19-2.26 (m, 1H);  $^{13}\text{C}$  NMR (100 MHz,  $\text{CDCl}_3$ ):  $\delta$  = 161.3, 135.5 (d,  $J$  = 4.0 Hz), 127.4 (d,  $J$  = 8.0 Hz), 115.5 (d,  $J$  = 22.0 Hz), 87.6, 67.2, 62.9, 35.6 ppm; HRMS Calcd for  $\text{C}_{10}\text{H}_{10}\text{ClFNaO}$ :  $[\text{M}+\text{Na}]^+$ , 223.0298. Found:  $m/z$  223.0295.

### 2o, 3-chloro-2-(2-(trifluoromethyl)phenyl)tetrahydrofuran

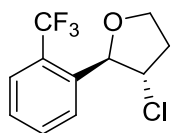

Colorless oil, 75% yield, 76% ee [Daicel CHIRALCEL OD-H (0.46 cm x 25 cm); hexane/2-propanol = 90/10; flow rate = 0.6 mL/min; detection wavelength = 254 nm;  $t_R$  = 13.06(minor), 13.78 (major) min].  $[\alpha]_D^{20}$  = -20.5 ( $c$  = 0.2,  $\text{CHCl}_3$ ).  $^1\text{H}$  NMR (400 MHz,  $\text{CDCl}_3$ ):  $\delta$  = 7.61 (d, 1H,  $J$  = 8.0 Hz), 7.46-7.54 (m, 1H), 7.40 (d, 1H,  $J$  = 8.0 Hz), 7.31-7.36 (m, 1H), 5.48 (s, 1H), 4.34-4.38 (m, 1H), 4.21-4.27 (m, 2H), 2.29-2.38 (m, 1H), 2.10-2.16 (m, 1H) ppm;  $^{13}\text{C}$  NMR (100 MHz,  $\text{CDCl}_3$ ):  $\delta$  = 139.5, 132.2, 131.6, 130.0, 128.2, 127.1, 126.2 (d,  $J$  = 5.0 Hz), 85.3 (d,  $J$  = 2.0 Hz), 68.2, 63.7, 34.7 ppm; HRMS Calcd for  $\text{C}_{11}\text{H}_{10}\text{F}_3\text{ClNaO}$ :  $[\text{M}+\text{Na}]^+$ , 273.0261. Found:  $m/z$  273.0257.

### 2p, 3-chloro-2-(4-(trifluoromethyl)phenyl)tetrahydrofuran

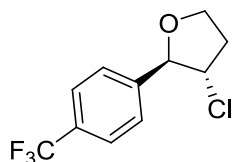

Colorless oil, 85% yield, 94% ee [Daicel CHIRALCEL OD-H (0.46 cm x 25 cm); hexane/2-propanol = 90/10; flow rate = 0.8 mL/min; detection wavelength = 254 nm;  $t_R$  = 8.34 (minor), 9.39 (major) min].  $[\alpha]_D^{20}$  = -35.3 ( $c$  = 0.2,  $\text{CHCl}_3$ ).  $^1\text{H}$  NMR (400 MHz,  $\text{CDCl}_3$ ):  $\delta$  = 7.62 (d, 2H,  $J$  = 8.0 Hz), 7.51 (d, 2H,  $J$  = 8.0 Hz), 5.02 (d, 1H,  $J$  = 4.8 Hz), 4.25-4.32 (m, 1H), 4.13-4.24 (m, 2H), 2.28-2.52 (m, 1H), 2.21-2.27 (m, 1H) ppm;  $^{13}\text{C}$  NMR (100 MHz,  $\text{CDCl}_3$ ):  $\delta$  = 143.9, 128.9, 125.9, 125.5 (d,  $J$  = 3 Hz), 87.5, 67.4, 62.7, 35.7 ppm; HRMS Calcd for  $\text{C}_{11}\text{H}_{10}\text{F}_3\text{ClNaO}$ :  $[\text{M}+\text{Na}]^+$ , 273.0258. Found:  $m/z$  273.0254.

### 2q, 3-chloro-2-(3-nitrophenyl)tetrahydrofuran

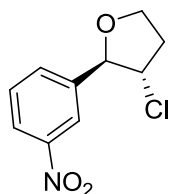

Colorless oil, 92% yield, 96% ee [Daicel CHIRALCEL OB-H (0.46 cm x 25 cm); hexane/2-propanol = 90/10; flow rate = 0.8 mL/min; detection wavelength = 254 nm;  $t_R$  = 25.37 (major), 27.87 (minor) min].  $[\alpha]_D^{20}$  = -32.8 ( $c$  = 0.2,  $\text{CHCl}_3$ ).  $^1\text{H}$  NMR (400 MHz,  $\text{CDCl}_3$ ):  $\delta$  = 8.28 (s, 1H), 7.17-7.19 (m, 1H), 7.72-7.75 (m, 1H), 7.33-7.37 (m, 1H), 5.03 (d, 1H,  $J$  = 4.8 Hz), 4.29-4.33 (m, 1H), 4.14-4.29 (m, 2H), 2.44-2.56 (m, 1H), 2.24-2.32 (m, 1H) ppm;  $^{13}\text{C}$  NMR (100 MHz,  $\text{CDCl}_3$ ):  $\delta$  = 148.5, 142.1, 131.8, 129.6, 123.1, 120.6, 87.0, 67.5, 62.4, 35.7 ppm; HRMS Calcd for  $\text{C}_{10}\text{H}_{10}\text{ClNNaO}_3$ :  $[\text{M}+\text{Na}]^+$ , 250.0535. Found:  $m/z$  250.0532.



### 2r, 3-chloro-2-cyclohexyltetrahydrofuran

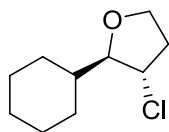

Colorless oil, 56% yield, 11% ee[(Varian Capillary Column CP-Chirasil-Dex CB): carrier gas, N<sub>2</sub>; injection temperature, 250 °C; detector temperature, 280 °C; column temperature, 80 °C, ramp 10 °C / min to 170 °C, then hold 30 min.  $t_1 = 25.66$  min,  $t_2 = 25.82$  min.].  $[\alpha]_D^{20} = -5.3$  ( $c = 0.2$ , CHCl<sub>3</sub>). <sup>1</sup>H NMR (400 MHz, CDCl<sub>3</sub>):  $\delta = 4.12$ - $4.16$  (m, 1H),  $3.87$ - $3.99$  (m, 2H),  $3.69$ - $3.72$  (m, 1H),  $2.28$ - $2.34$  (m, 1H),  $2.10$ - $2.15$  (m, 1H),  $1.68$ - $1.79$  (m, 7H),  $1.17$ - $1.25$  (m, 4H) ppm; <sup>13</sup>C NMR (100 MHz, CDCl<sub>3</sub>):  $\delta = 91.7$ ,  $66.4$ ,  $58.7$ ,  $41.3$ ,  $37.1$ ,  $29.3$ ,  $28.6$ ,  $26.4$ ,  $26.0$ ,  $25.9$  ppm; HRMS Calcd for C<sub>10</sub>H<sub>17</sub>ClNaO: [M+Na]<sup>+</sup>, 211.0866. Found:  $m/z$  211.0865.

### 2t, 3-chloro-2-phenyltetrahydrofuran

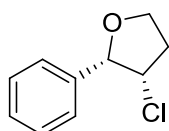

Colorless oil, 80% yield, 84% ee [Daicel CHIRALPAK AD-H (0.46 cm x 25 cm); hexane/2-propanol = 99/1; flow rate = 0.8 mL/min; detection wavelength = 254 nm;  $t_R = 10.86$  (major),  $12.11$  (minor) min].  $[\alpha]_D^{20} = +15.8$  ( $c = 0.2$ , CHCl<sub>3</sub>). <sup>1</sup>H NMR (400 MHz, CDCl<sub>3</sub>):  $\delta = 7.36$ - $7.37$  (m, 4H),  $7.29$ - $7.34$  (m, 1H),  $5.02$  (d, 1H,  $J = 4.4$  Hz),  $4.25$ - $4.32$  (m, 1H),  $4.16$ - $4.22$  (m, 2H),  $2.42$ - $2.52$  (m, 1H),  $2.18$ - $2.25$  (m, 1H) ppm; <sup>13</sup>C NMR (100 MHz, CDCl<sub>3</sub>):  $\delta = 139.9$ ,  $128.5$ ,  $128.0$ ,  $125.6$ ,  $88.3$ ,  $67.3$ ,  $63.2$ ,  $35.6$  ppm; HRMS Calcd for C<sub>10</sub>H<sub>11</sub>ClNaO: [M+Na]<sup>+</sup>, 205.0391. Found:  $m/z$  205.0389.

### 2u, 3-chloro-2-o-tolyltetrahydro-2H-pyran

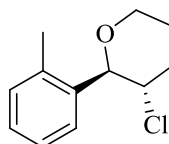

Colorless oil, 70% yield, 13% ee [Daicel CHIRALPAK AD-H (0.46 cm x 25 cm); hexane/2-propanol = 99/1; flow rate = 0.8 mL/min; detection wavelength = 254 nm;  $t_R = 13.21$ (minor),  $14.96$  (major) min].  $[\alpha]_D^{20} -11.5$  ( $c = 0.2$ , CHCl<sub>3</sub>). <sup>1</sup>H NMR (400 MHz, CDCl<sub>3</sub>):  $\delta = 7.10$ - $7.32$  (m, 4H),  $4.81$  (s, 1H),  $4.01$ - $4.45$  (m, 1H),  $3.97$ - $4.00$  (m, 1H),  $3.51$ - $3.56$  (m, 1H),  $2.33$ - $2.45$  (m, 5H),  $2.17$ - $2.28$  (m, 2H) ppm; <sup>13</sup>C NMR (100 MHz, CDCl<sub>3</sub>):  $\delta = 142.6$ ,  $135.6$ ,  $128.9$ ,  $128.7$ ,  $125.4$ ,  $125.2$ ,  $79.9$ ,  $67.6$ ,  $58.5$ ,  $34.3$ ,  $26.2$ ,  $20.5$ ,  $18.7$  ppm; HRMS Calcd for C<sub>12</sub>H<sub>15</sub>ClNaO: [M+Na]<sup>+</sup>, 234.0698. Found:  $m/z$  234.0695.

## References

- 1 A. E. Taggi, A. M. Hafez, H. Wack, B. Young, D. Ferraris, and T. Lectka, *J. Am. Chem. Soc.*, 2002, **124**, 6626.
- 2 S. J. Rowan, D. J. Reynolds and J. K. M. Sanders, *J. Org. Chem.*, 1999, **64**, 5804.
- 3 (a) S. Diezi, A. Szabo, T. Mallat and A. Baiker, *Tetrahedron: Asymmetry*, 2003, **14**, 2573; (b) I. Busygin, E. Toukoniitty, R. Sillanpää, D. Y. Murzin and R. Leino, *Eur. J. Org. Chem.*, 2005, **13**, 2811.
- 4 S. J. Rowan and J. K. M. Sanders, *J. Org. Chem.*, 1998, **63**, 1536.
- 5 M. Lian, Z. Li, J. Du, Q. Meng and Z. Gao, *Eur. J. Org. Chem.*, 2010, **18**, 6525.
- 6 Y. Wang, J. Sun, and K. Ding, *Tetrahedron*, 2000, **56**, 4447.
- 7 S. Arai, S. Hamaguchi and T. Shioiri, *Tetrahedron Lett.*, 1998, **39**, 2997.
- 8 H. Kawai, A. Kusuda, S. Nakamura, N. Shibata and M. Shiro, *Angew. Chem., Int. Ed.*, 2009, **48**, 6324.
- 9 F. Mu, D. J. Lee, D. E. Pryor, E. Hamel and M. Cushman, *J. Med. Chem.* 2002, **45**, 4774.
- 10 J. Petriguet, A. Boudhar, G. Blond and J. Suffert, *Angew. Chem., Int. Ed.*, 2011, **50**, 3285.
- 11 L. Crombie and R. D. Wyvill, *J. Chem. Soc. Perkin Trans. I*, 1985, 1971.
- 12 E. D. Butova, A. V. Barabash, A. A. Petrova, C. M. Kleiner, P. R. Schreiner and A. A. Fokin, *J. Org. Chem.*, 2010, **75**, 6229.

3. NMR Spectra of the products

2a

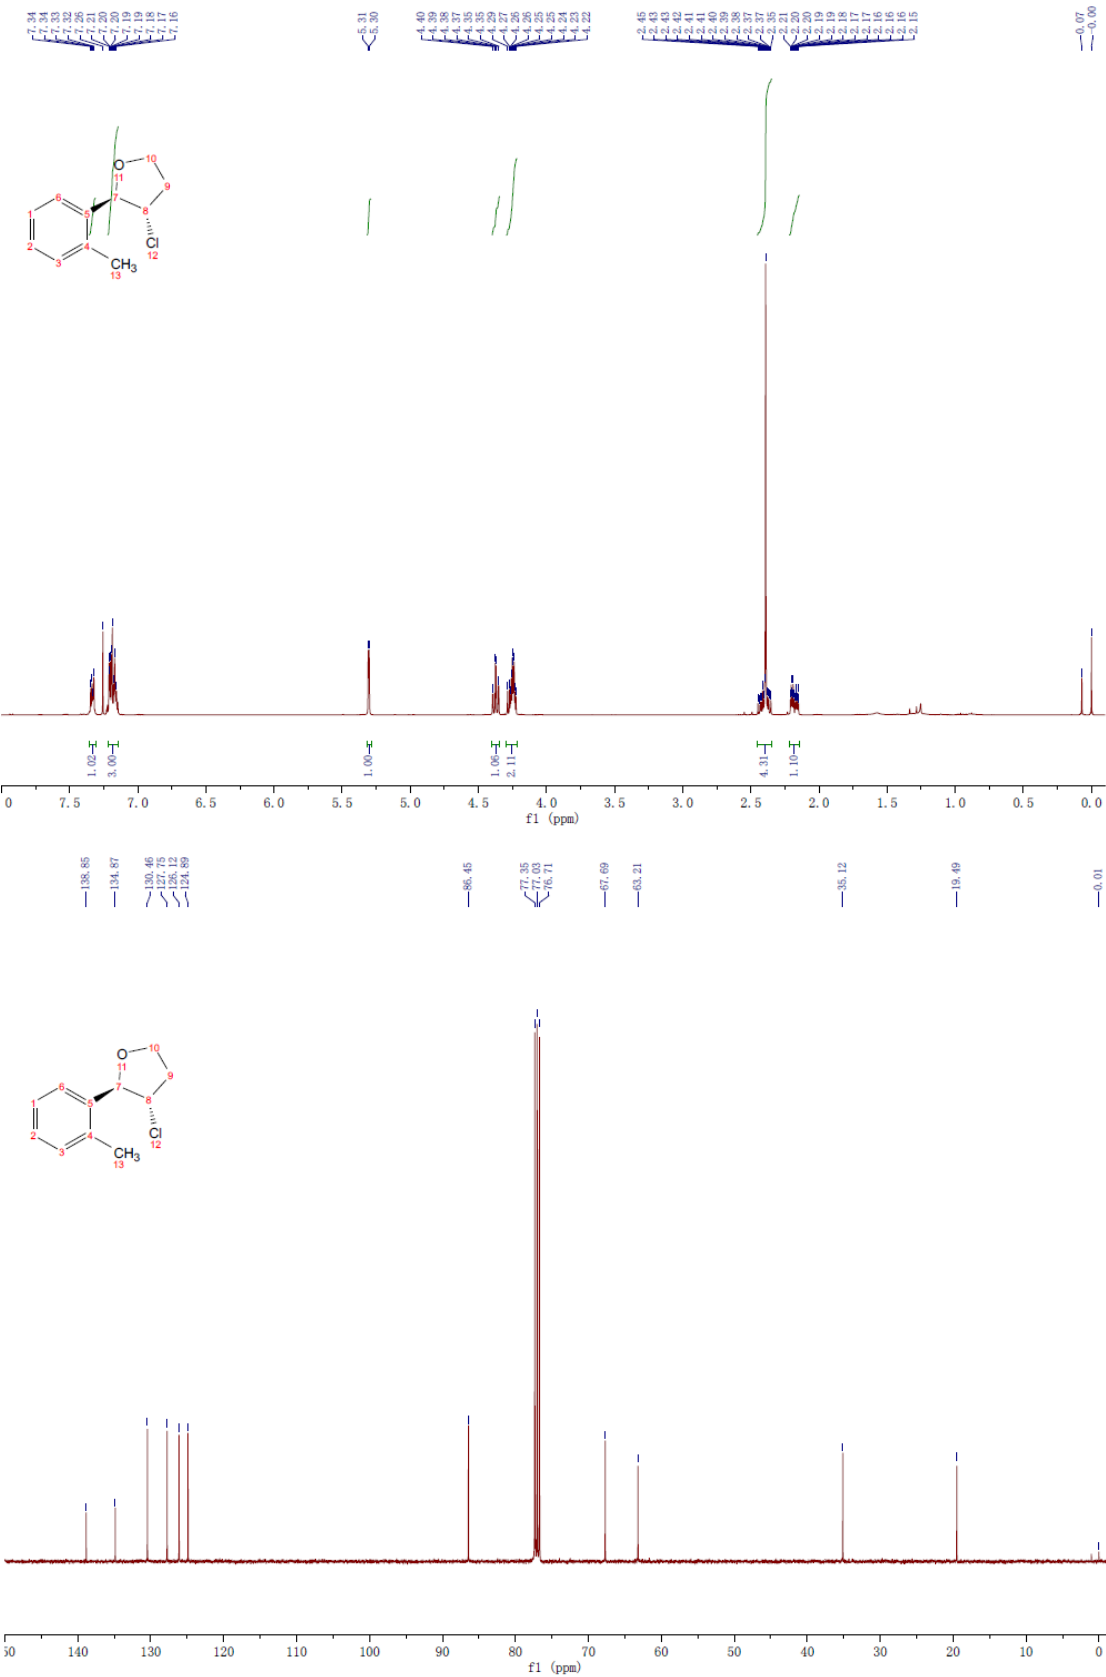

2b

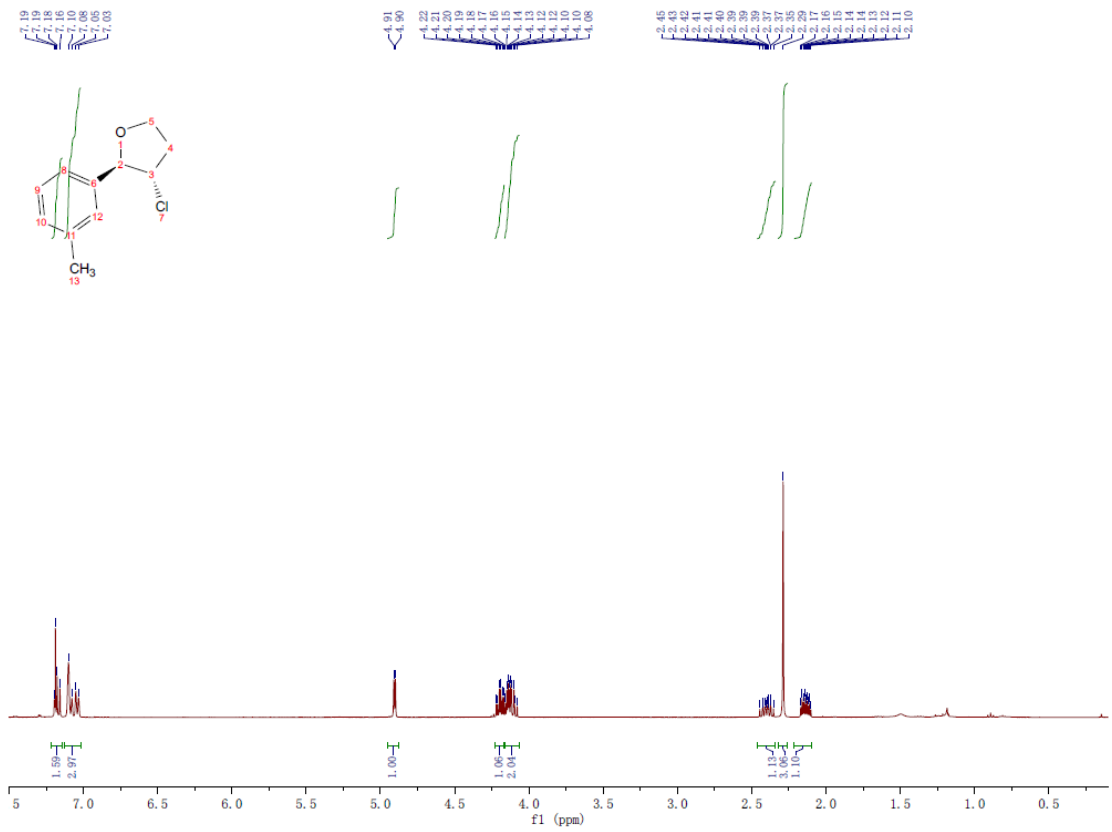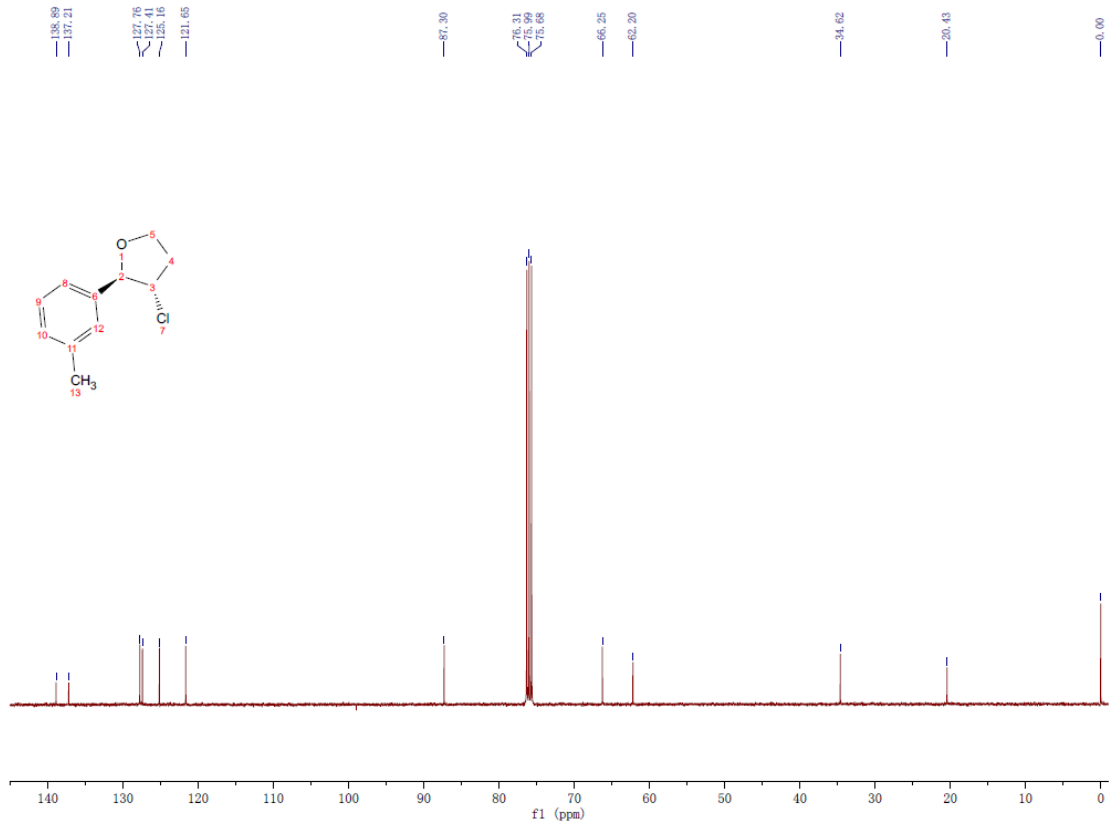

2c

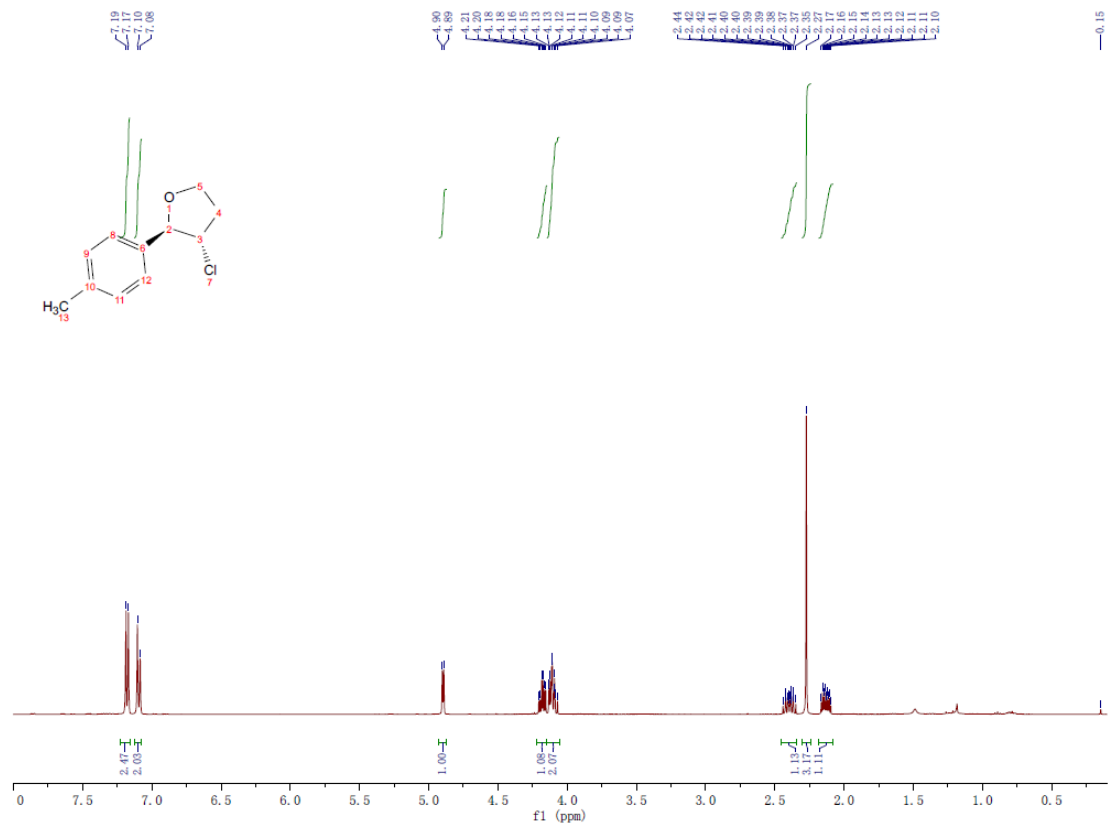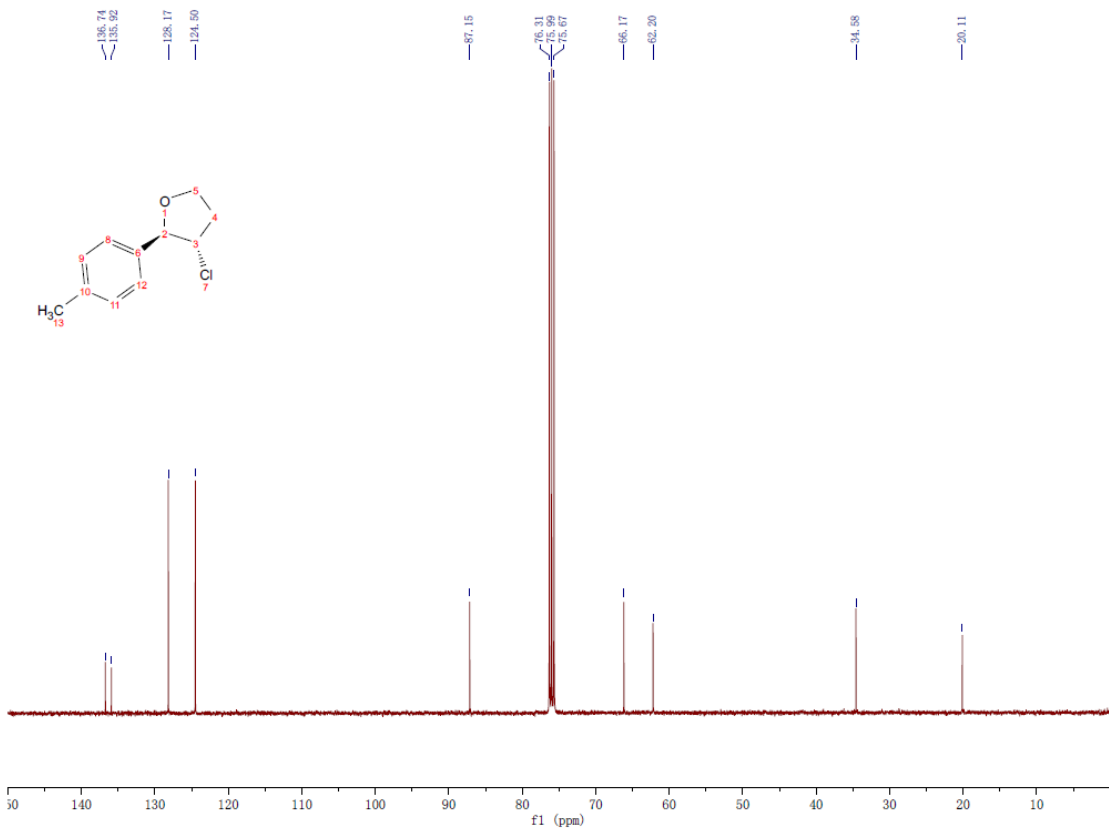

2d

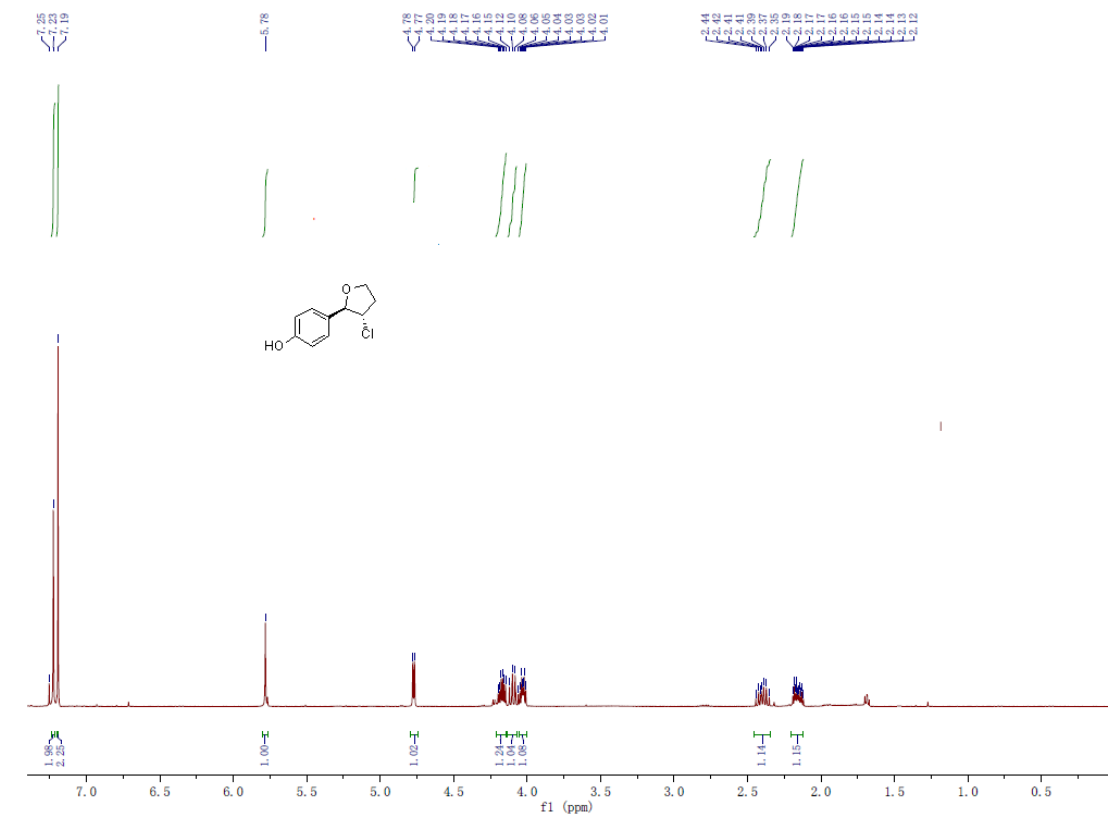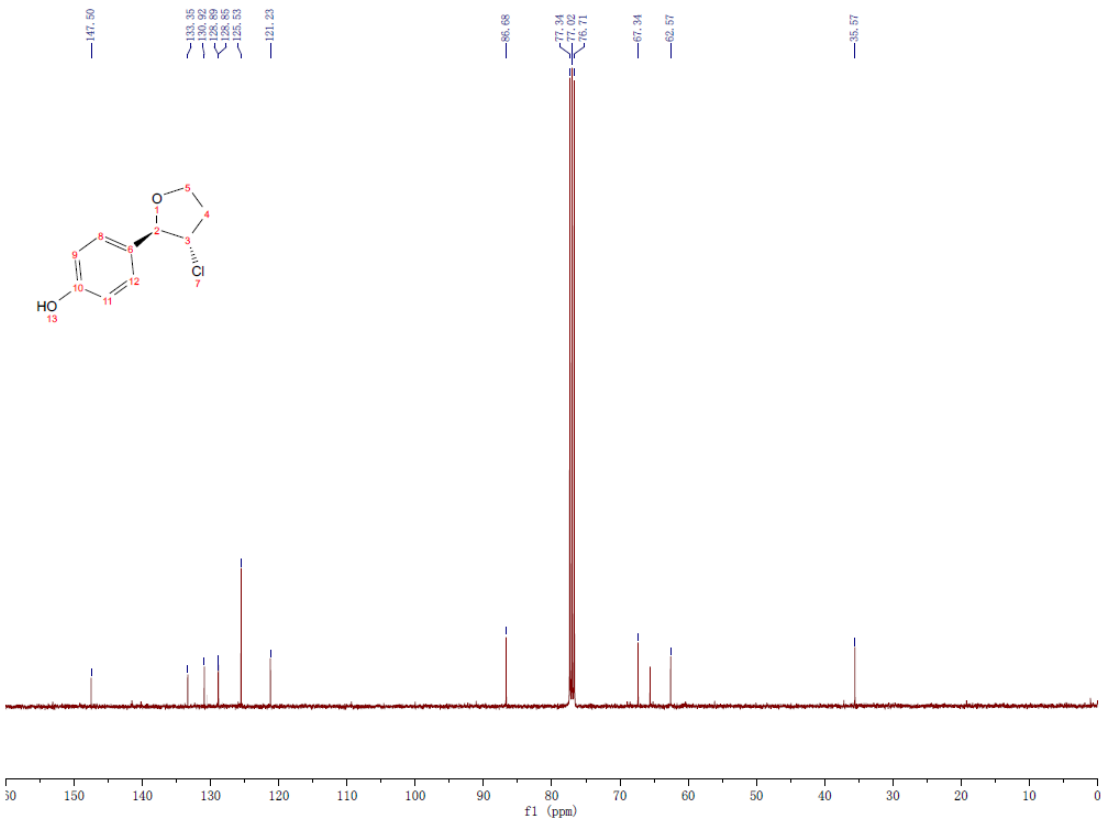

2e

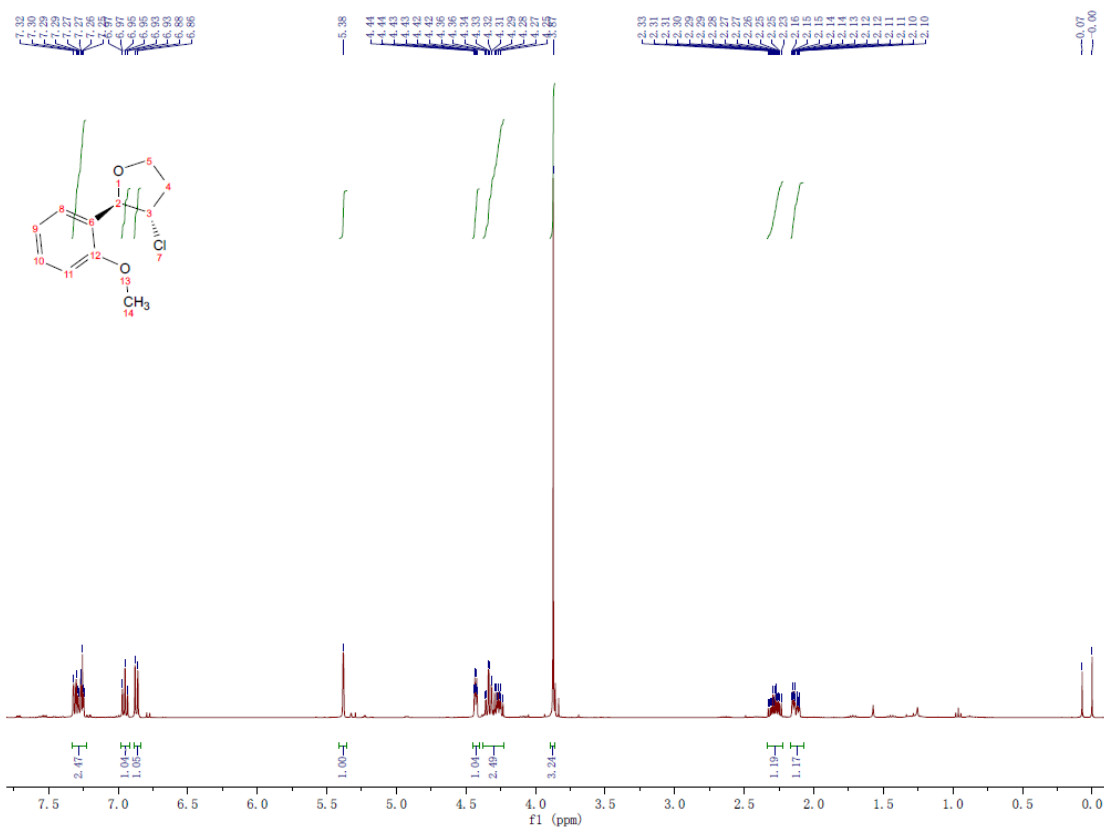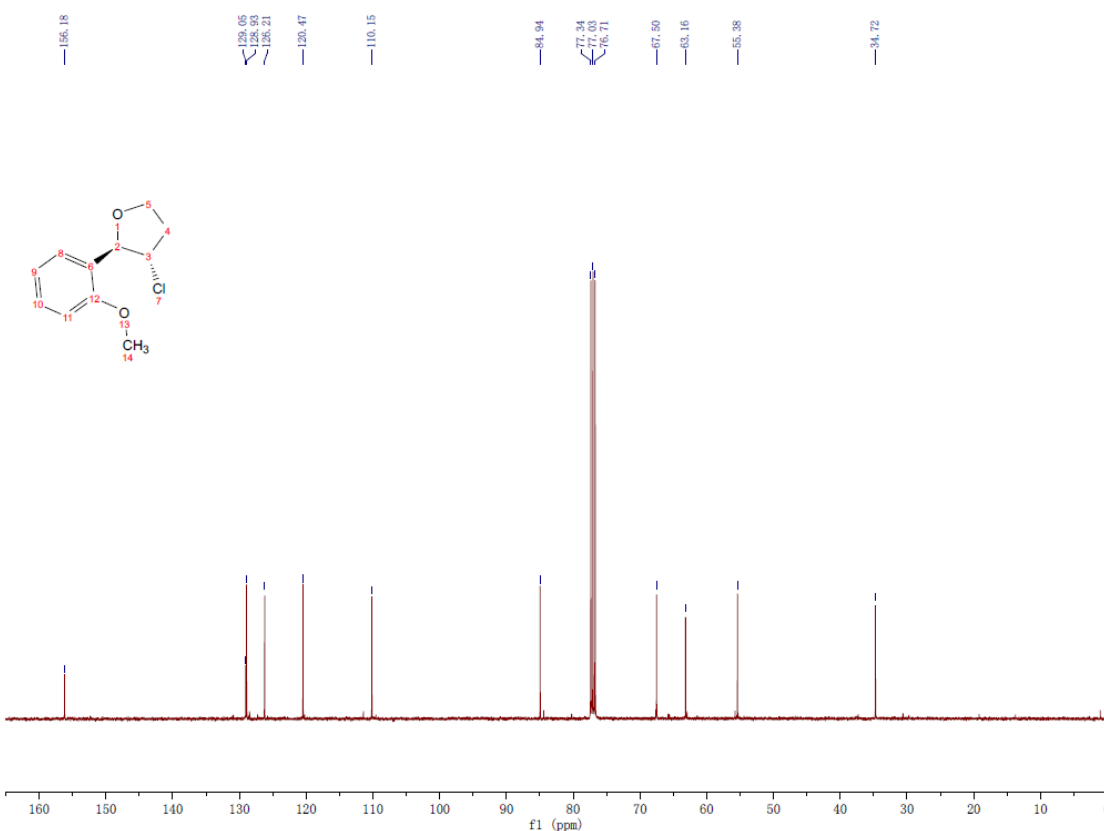

2f

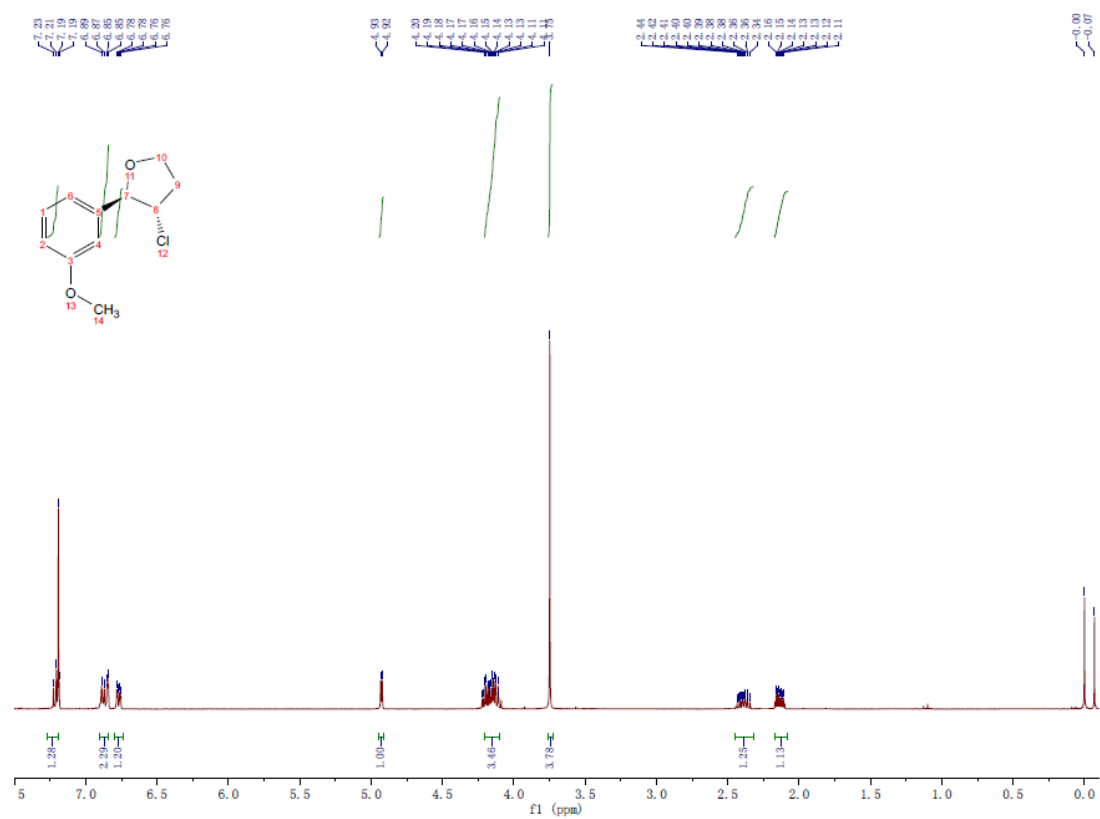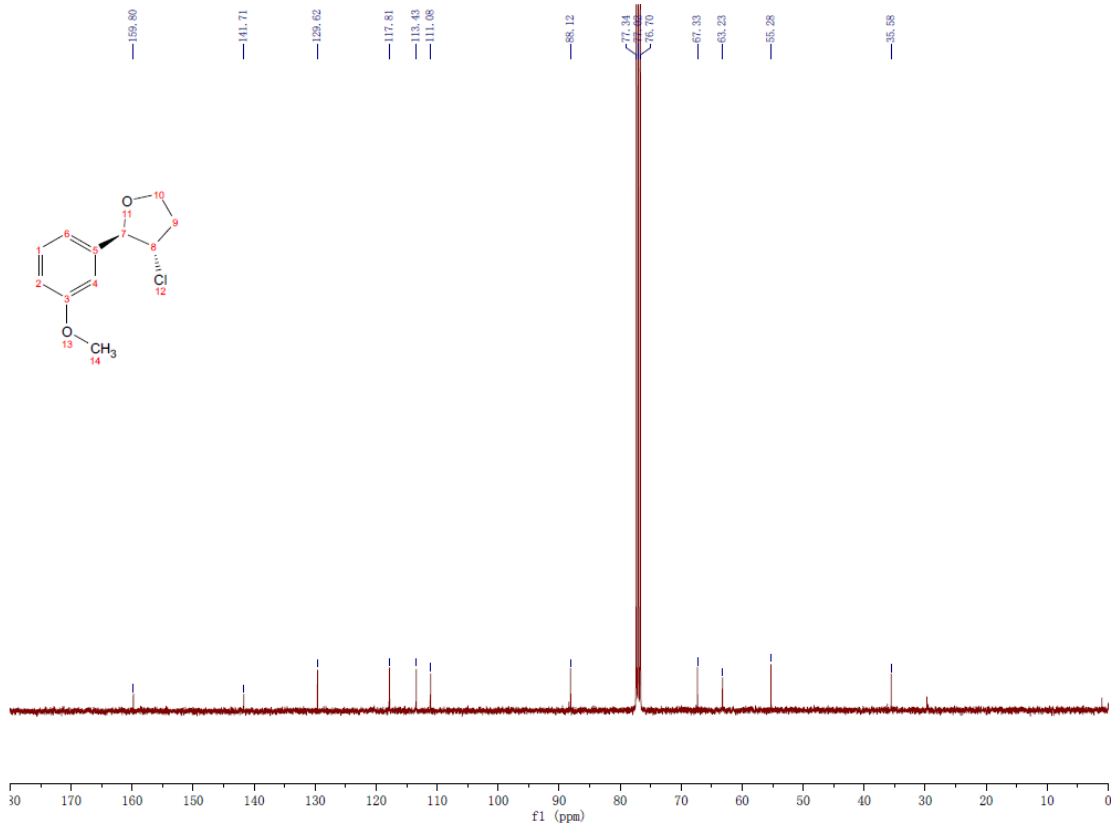



2g

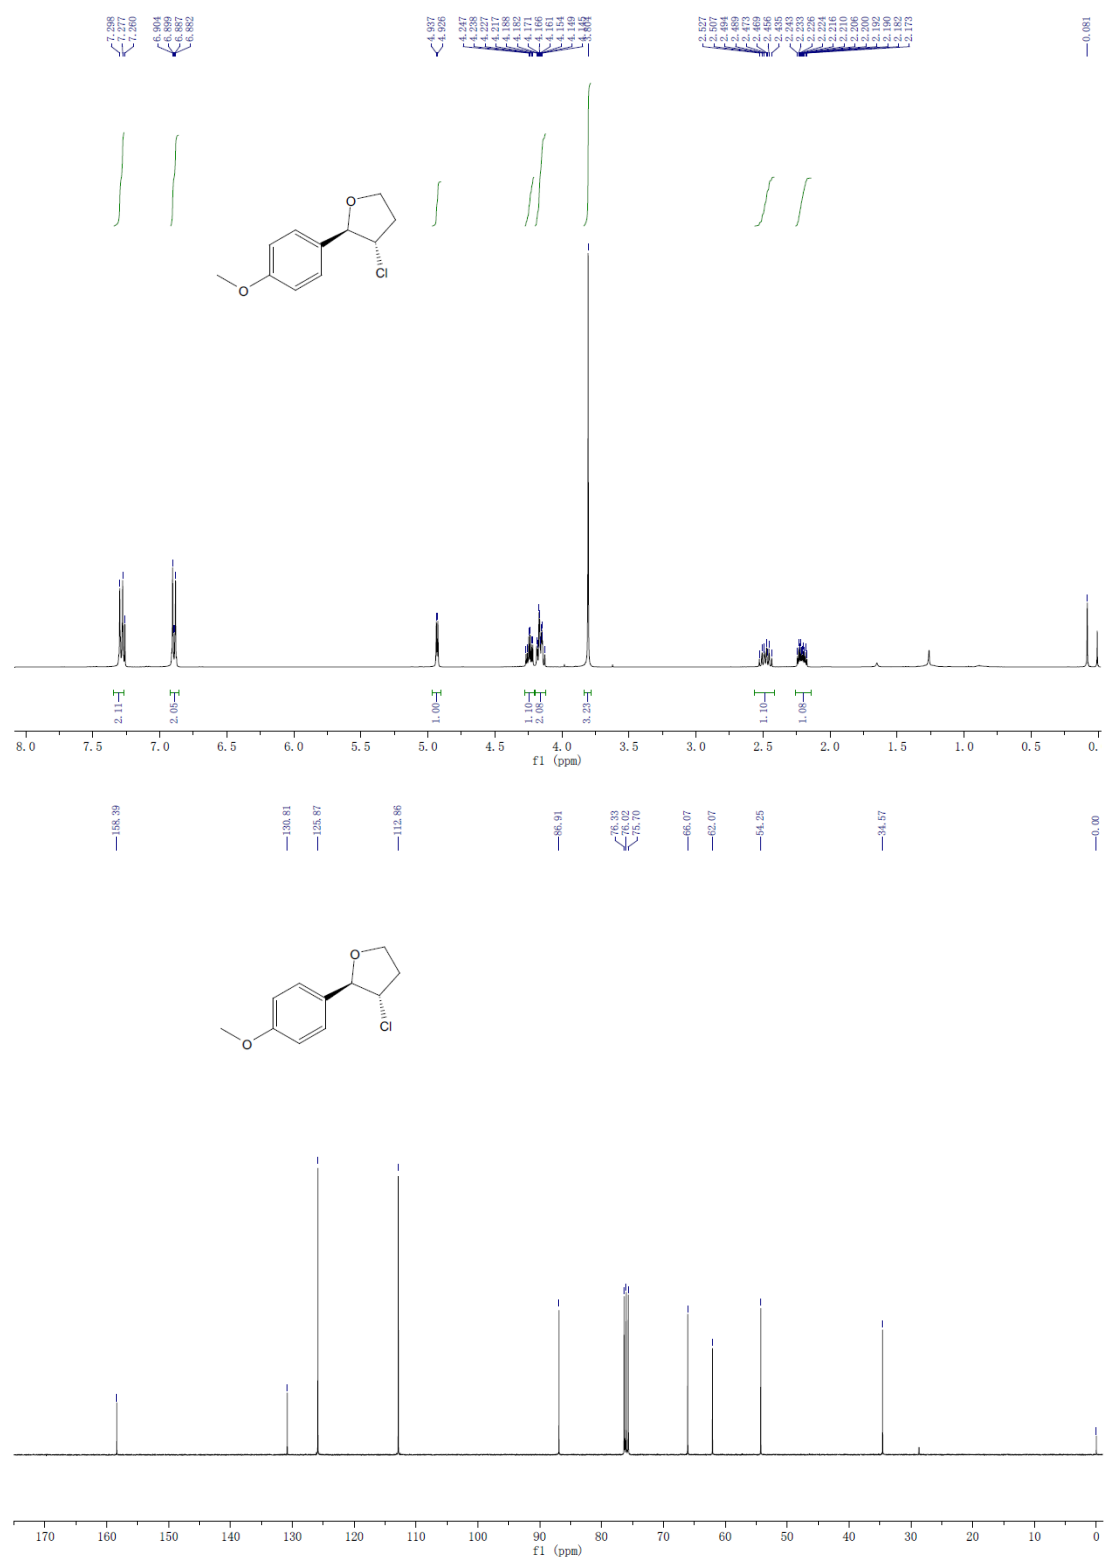

2h

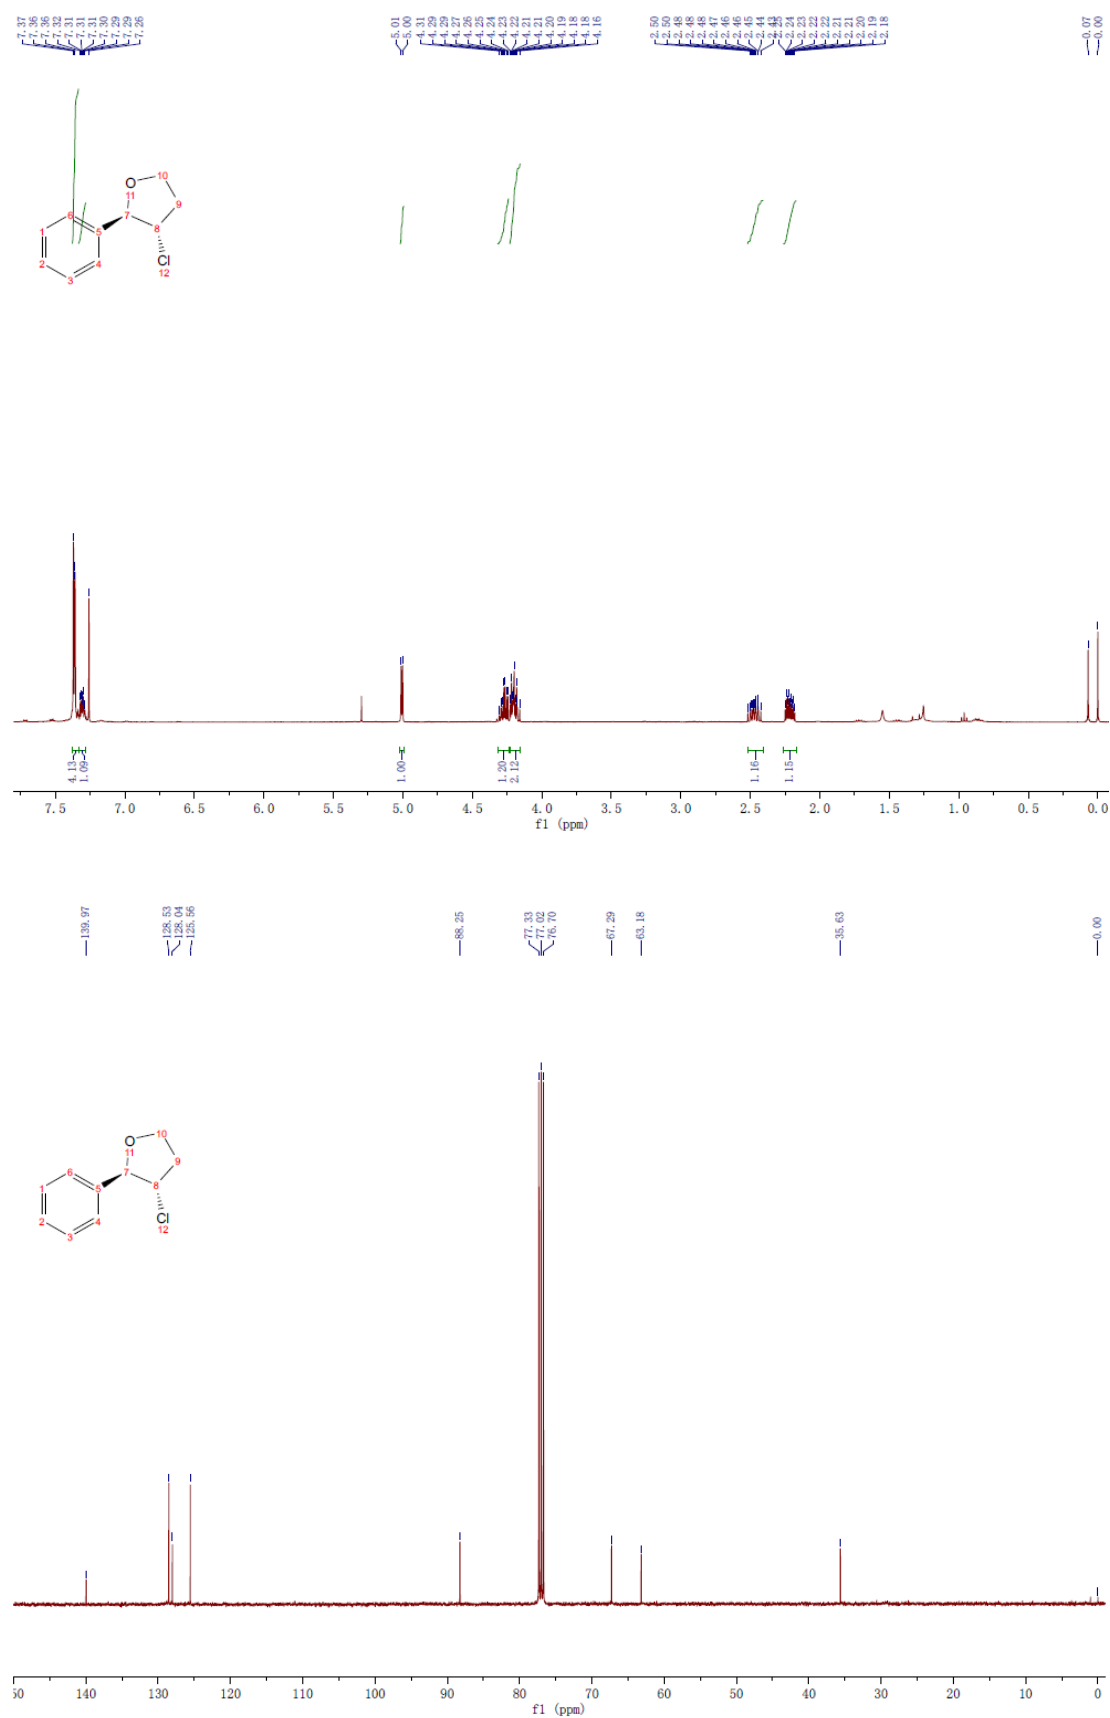

2i

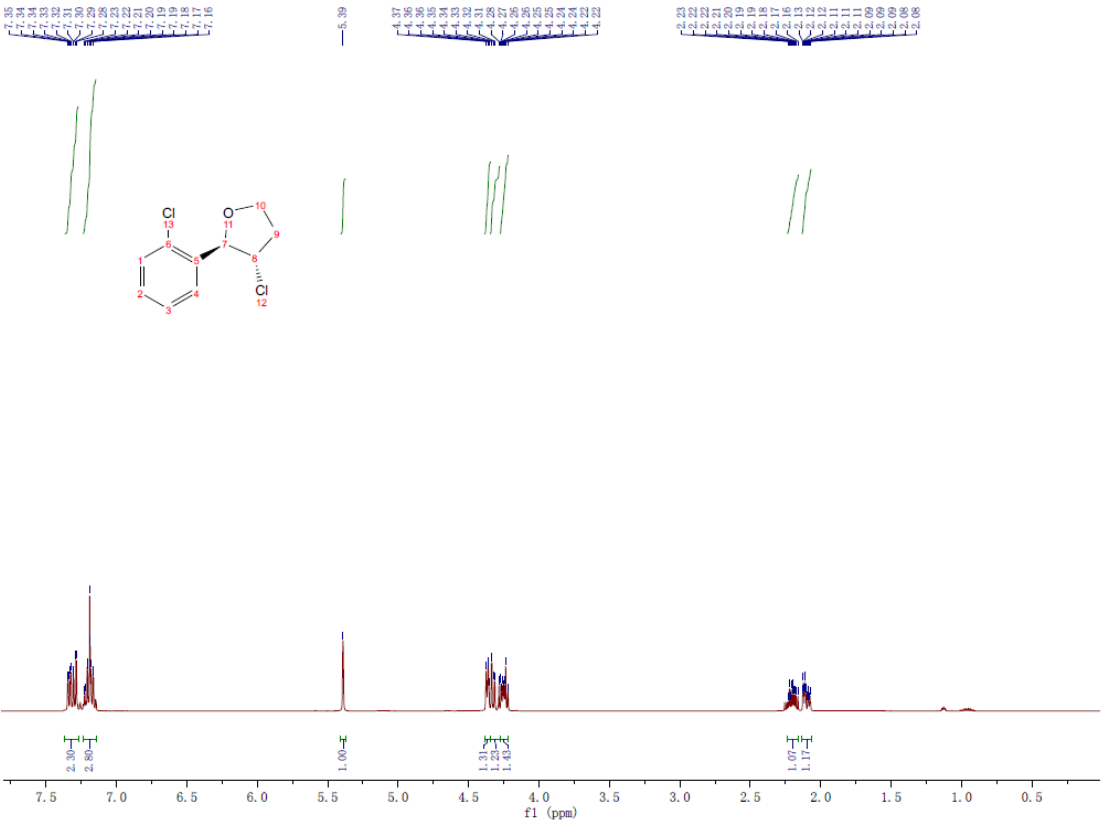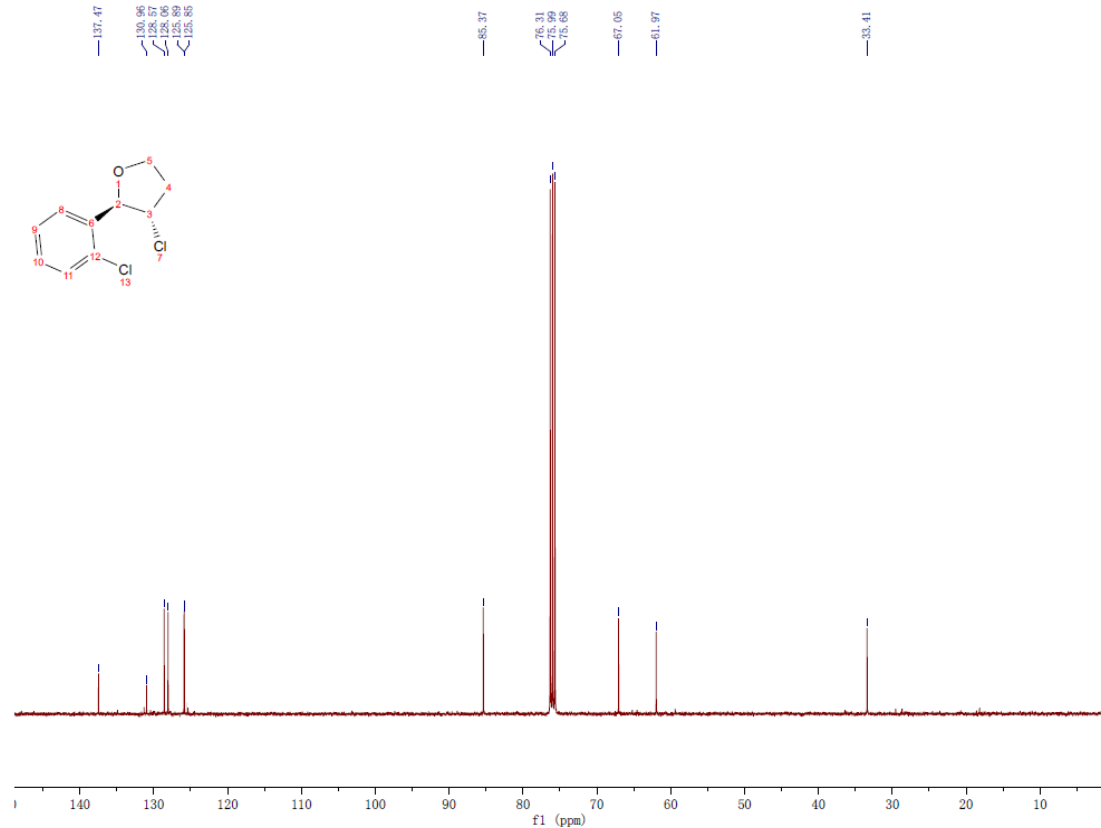

2j

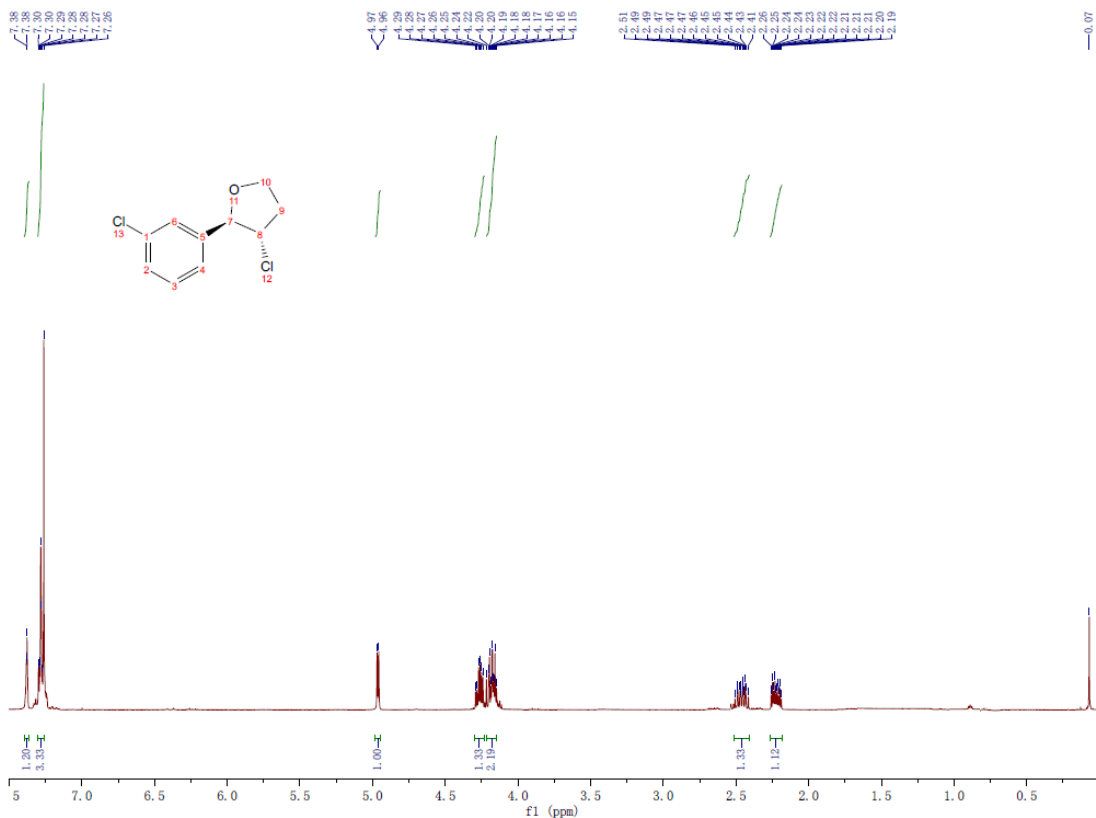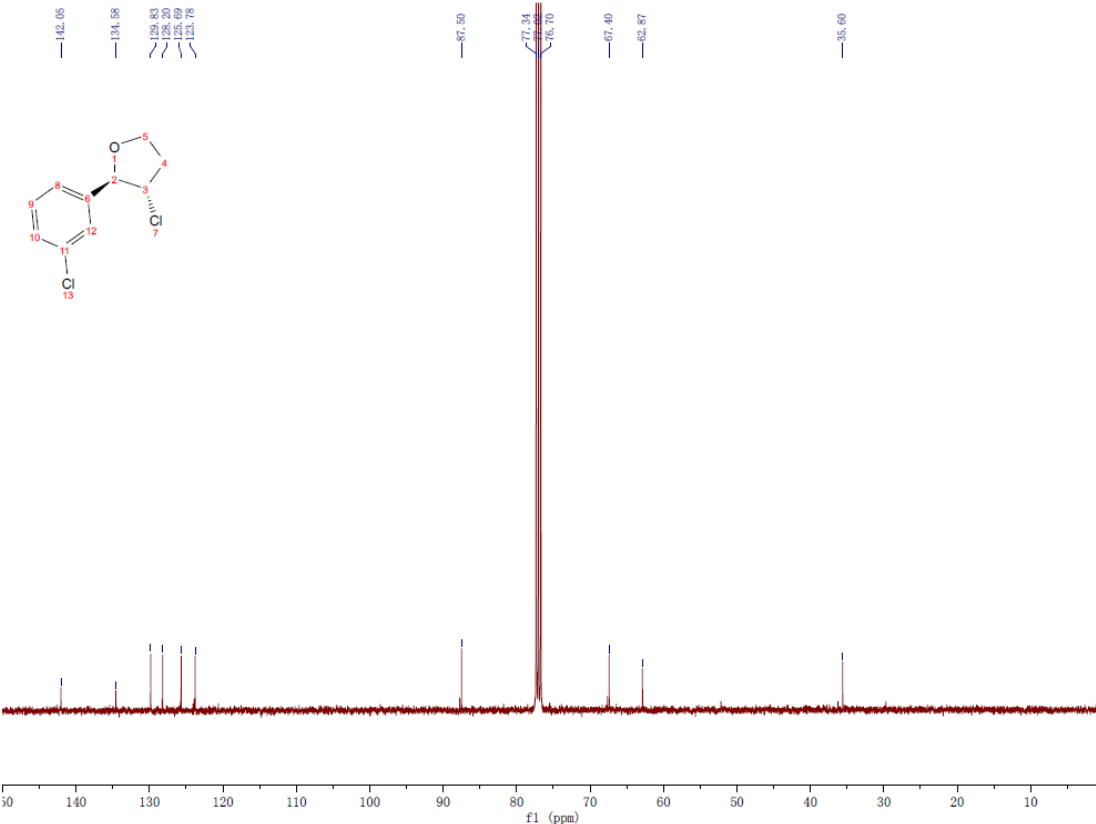

2k

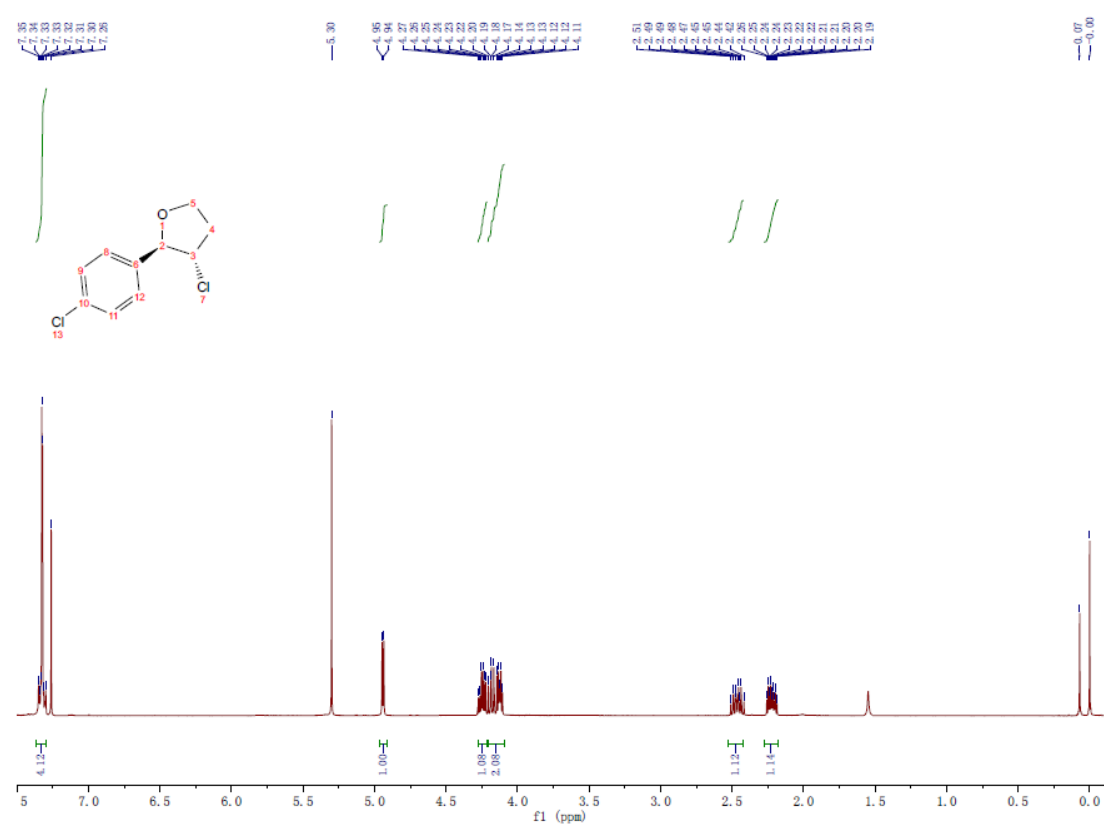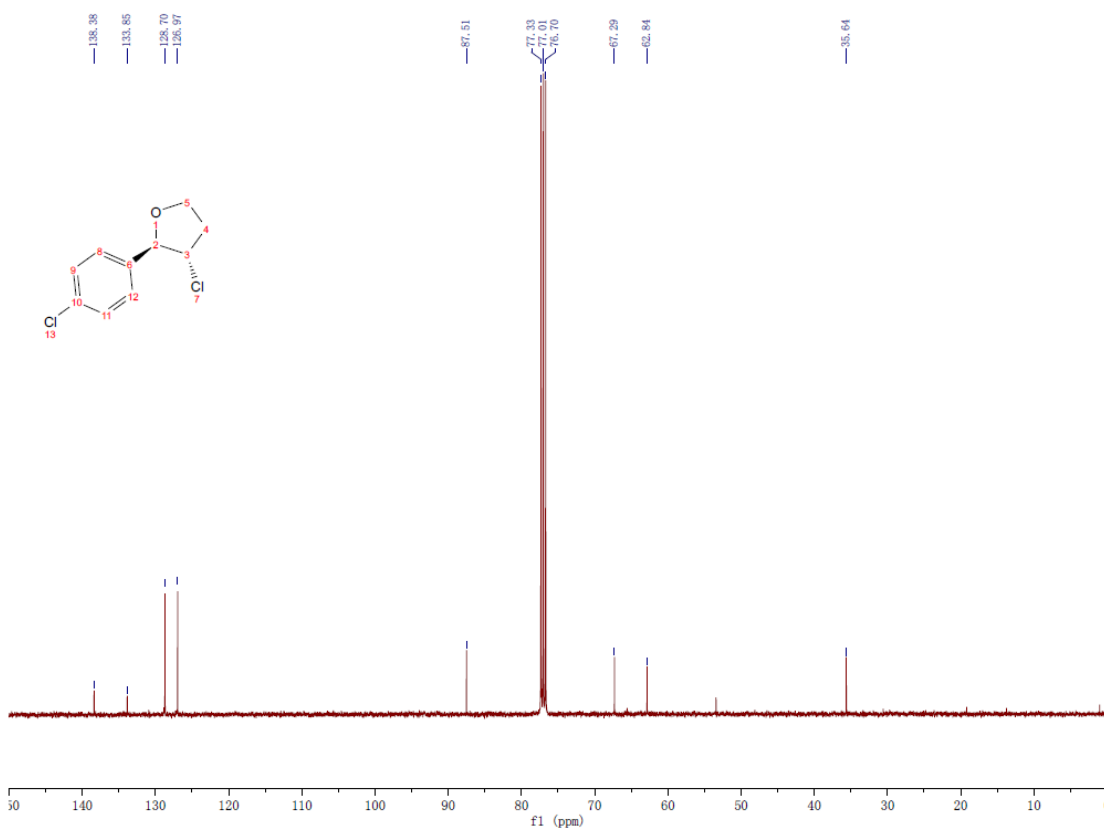

21

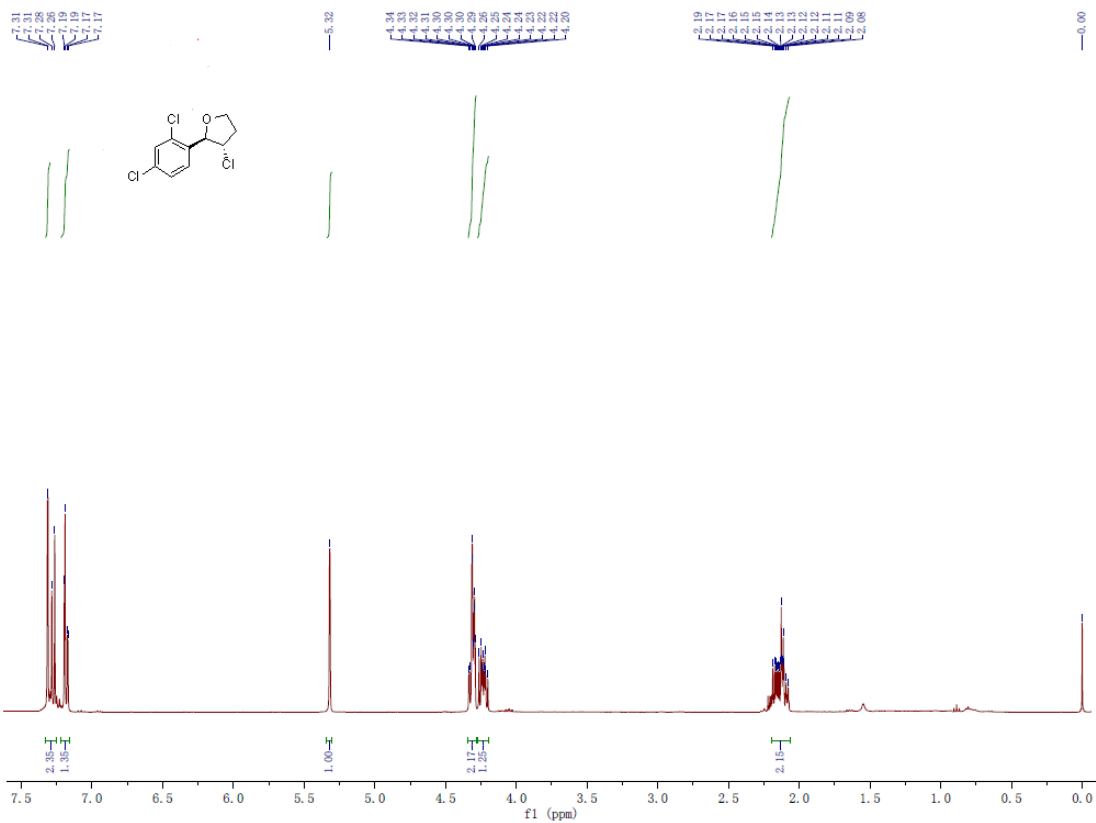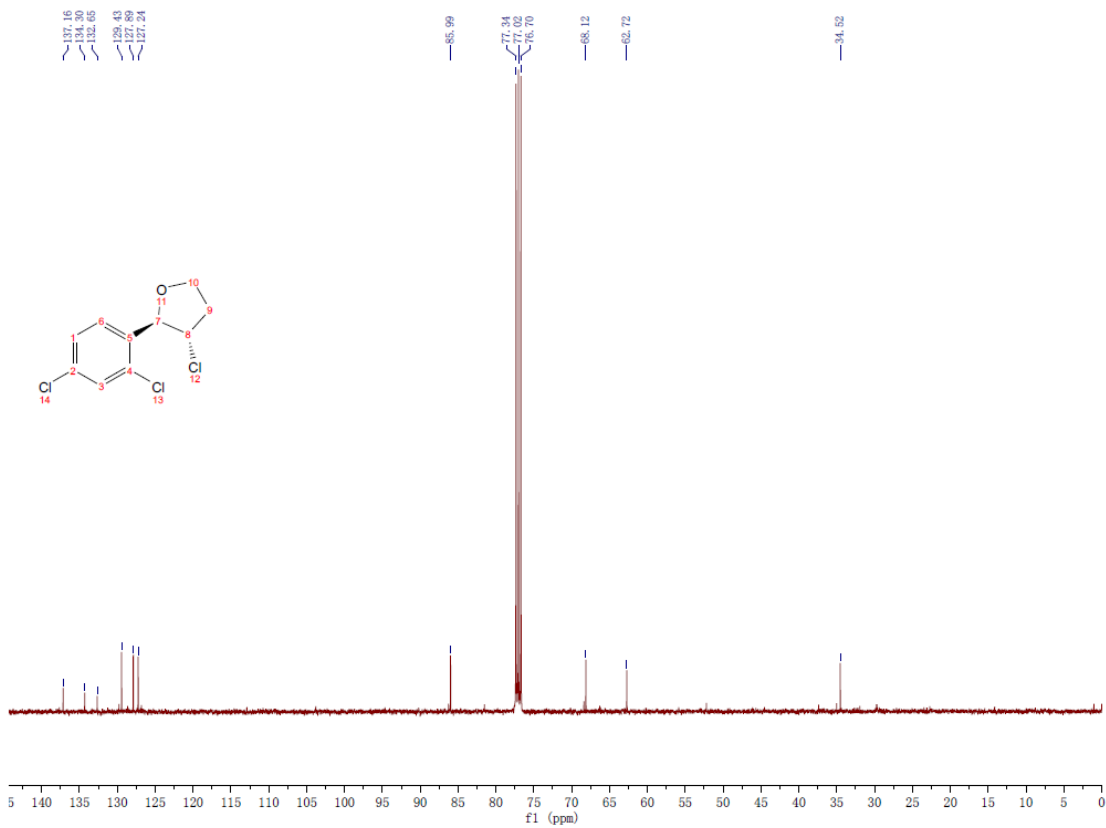

2m

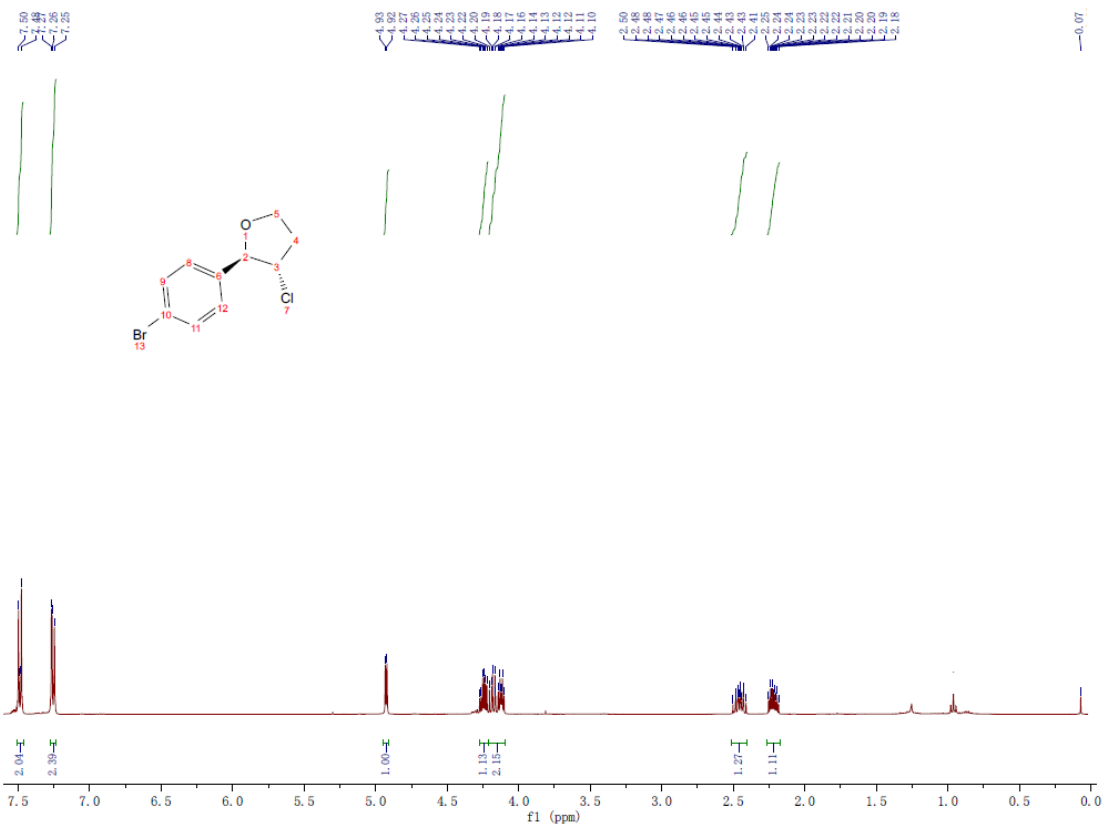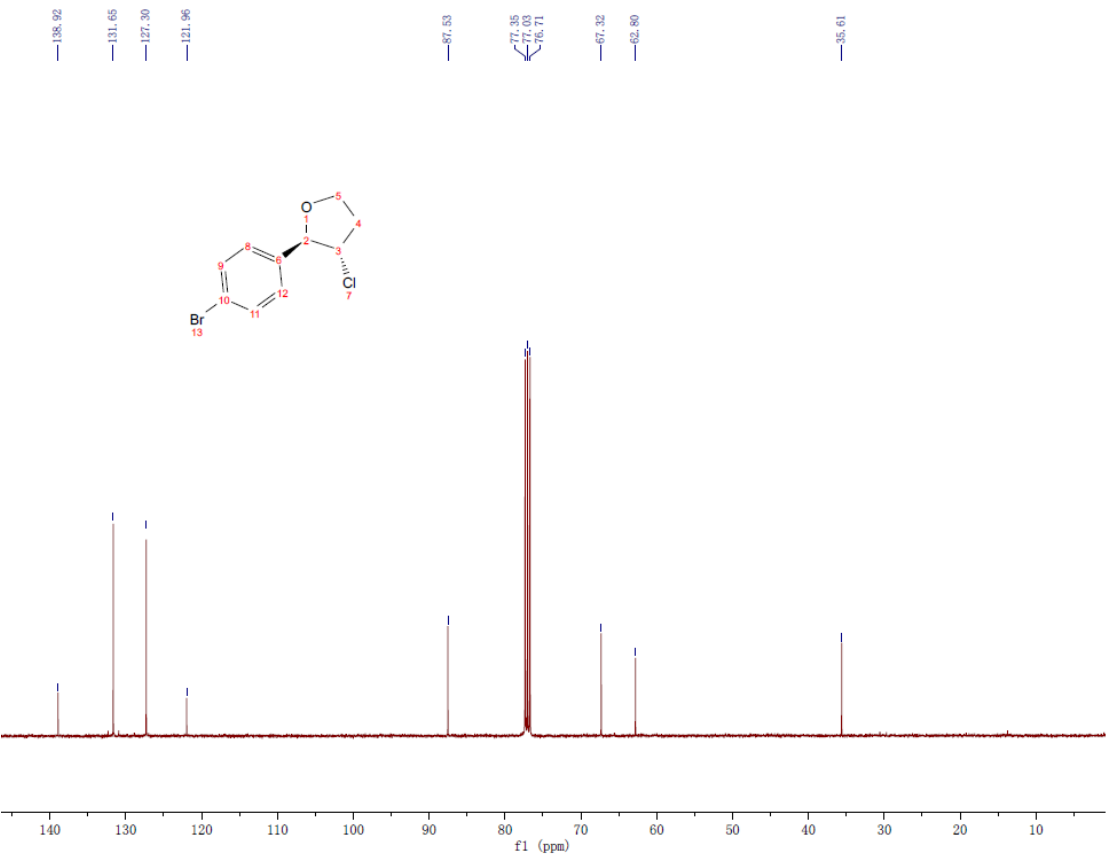

2n

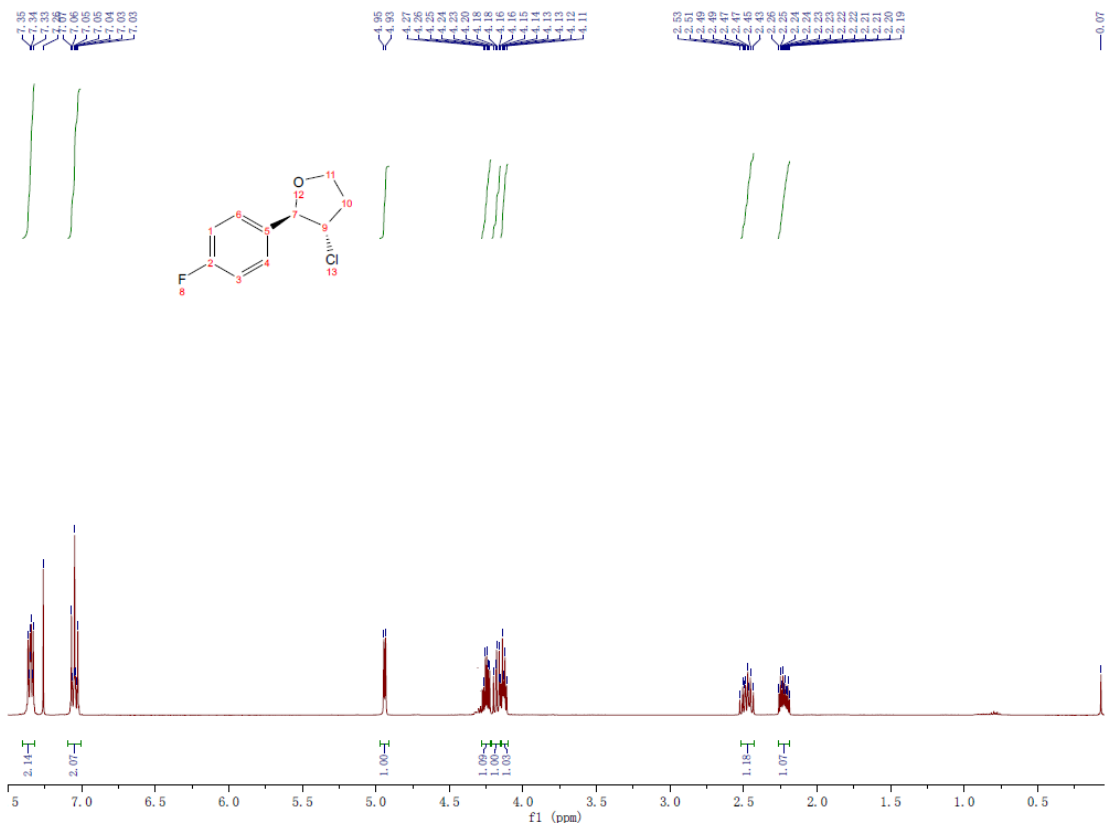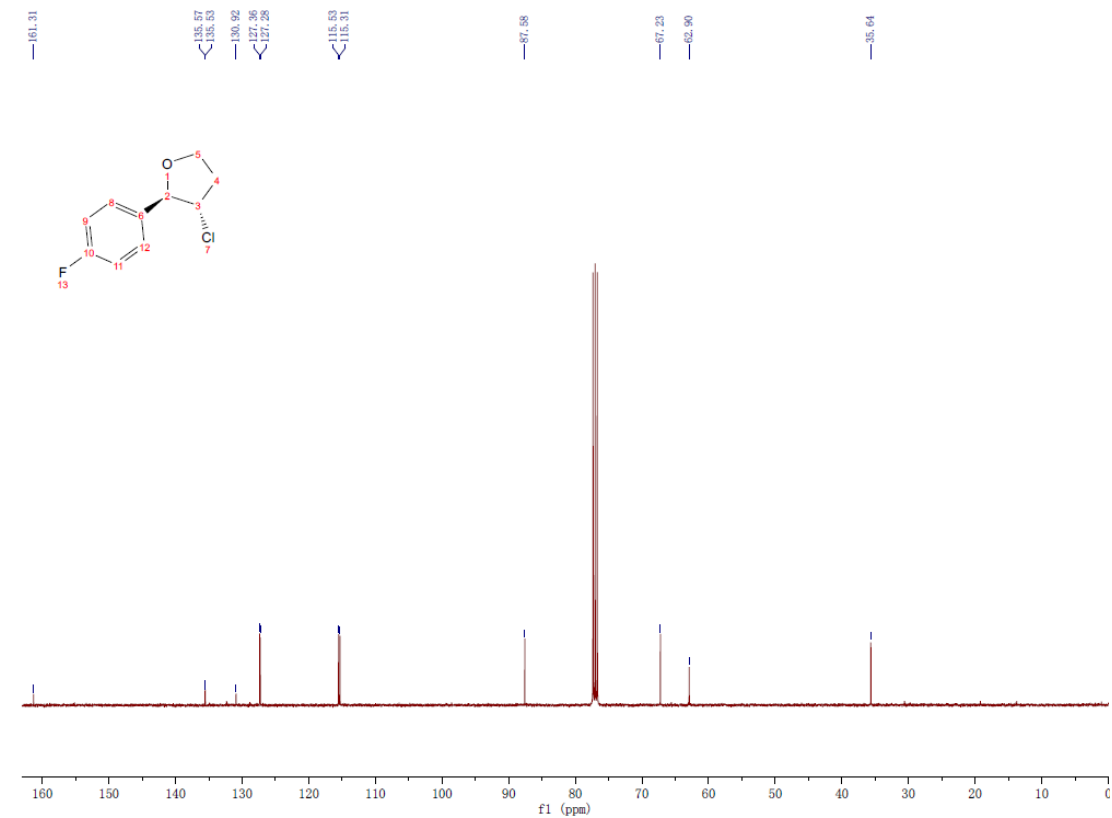



2o

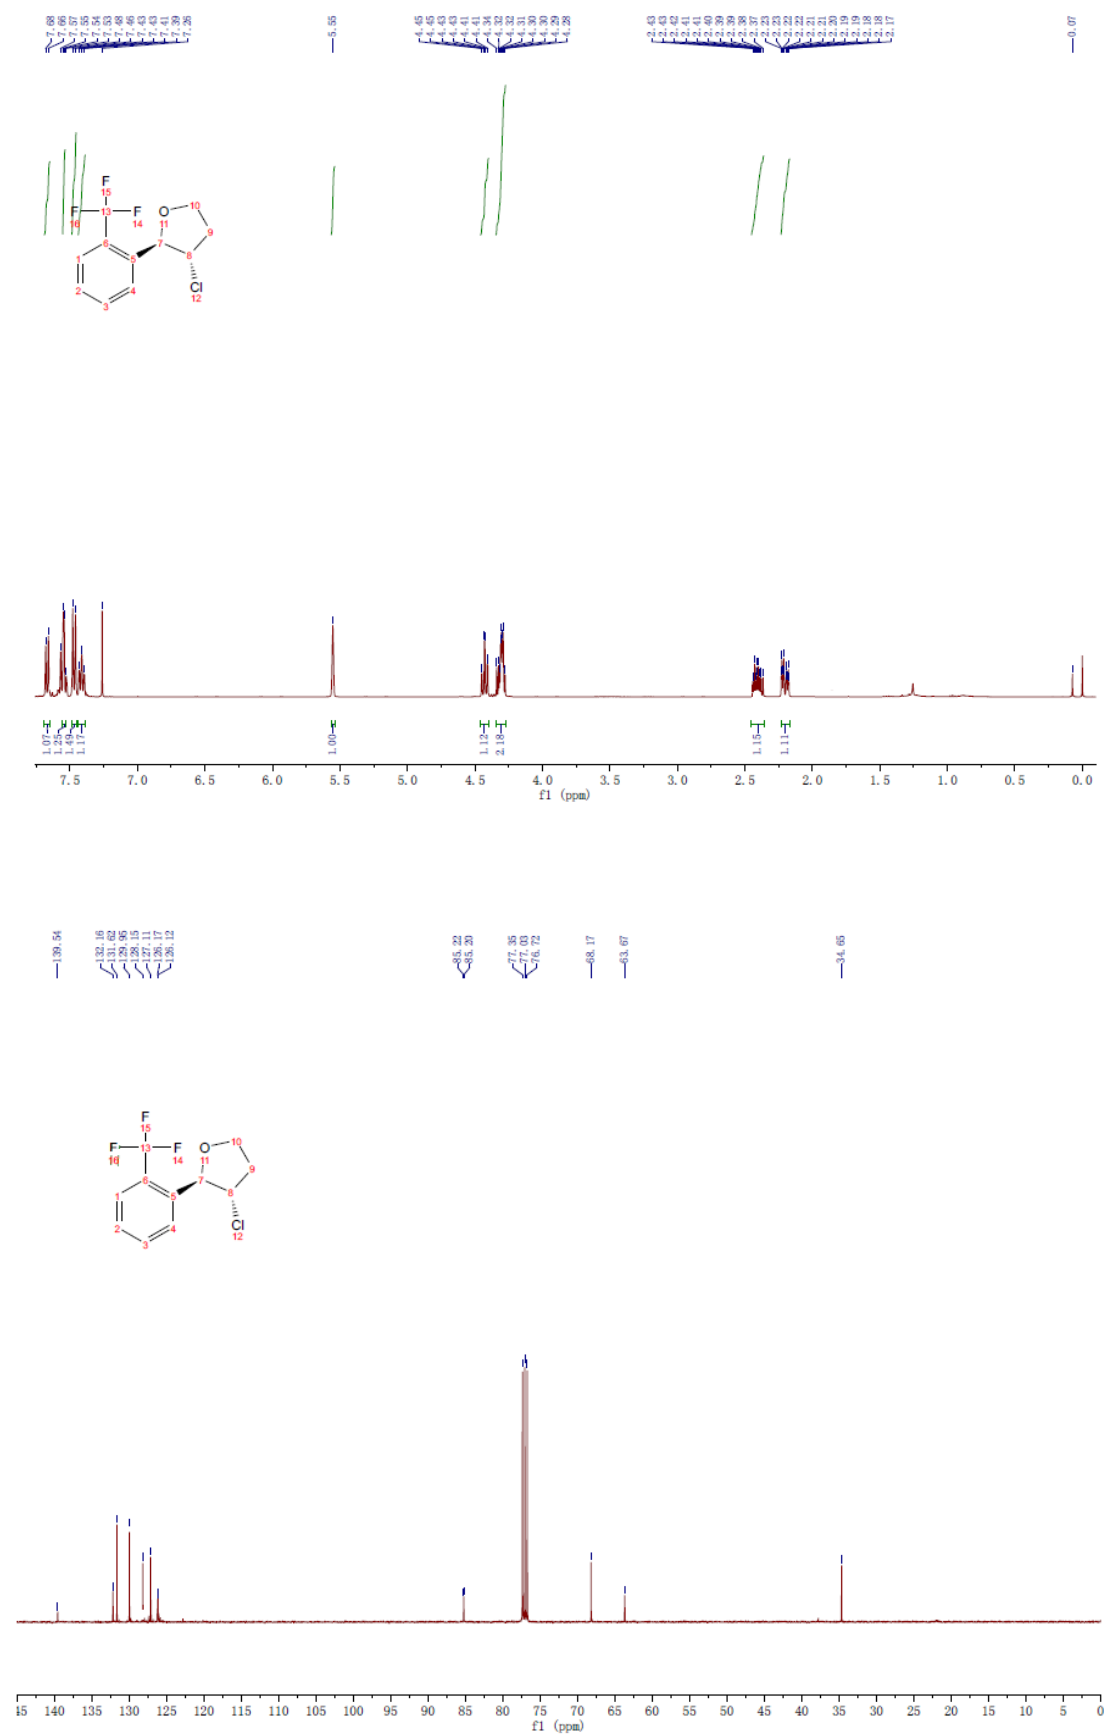

2p

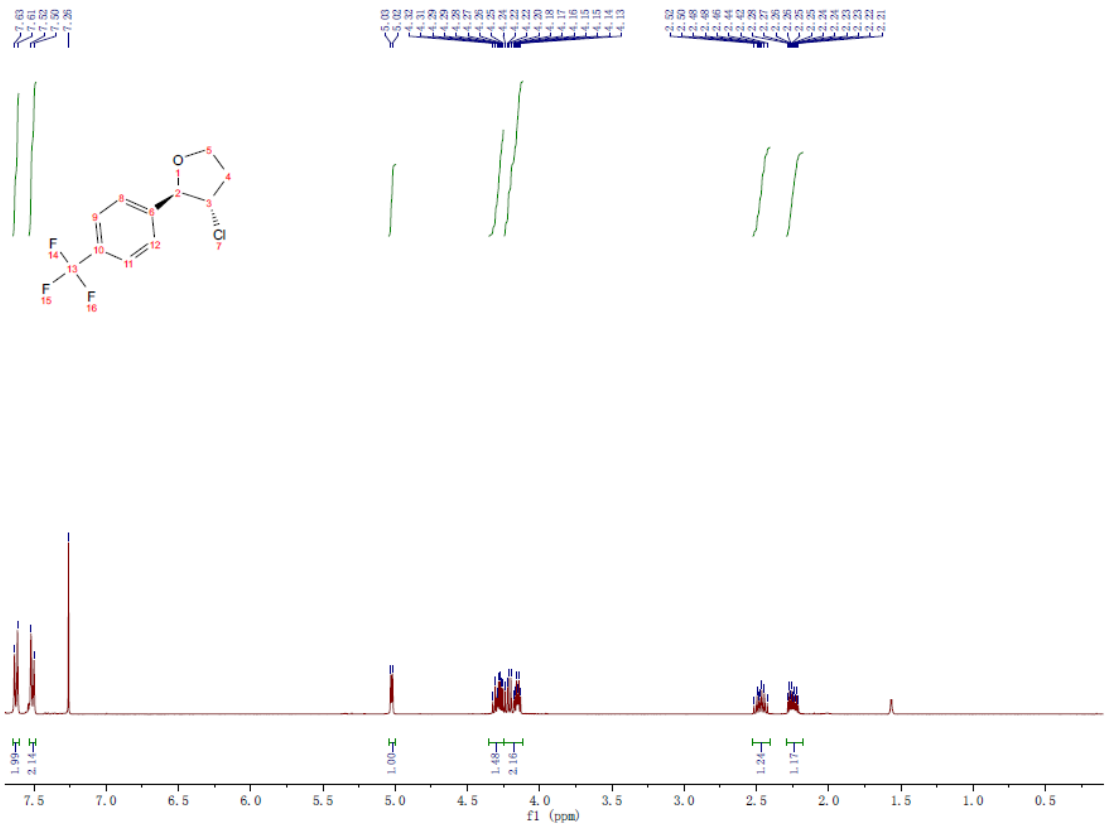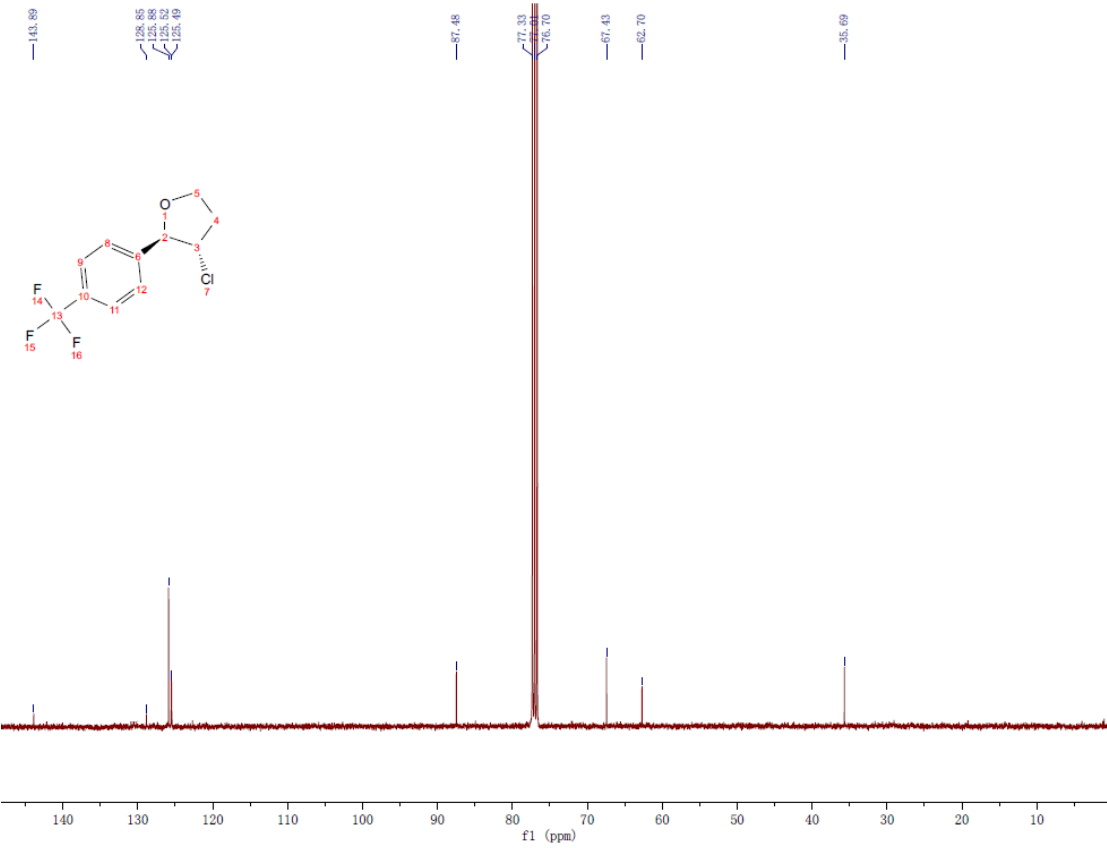

2q

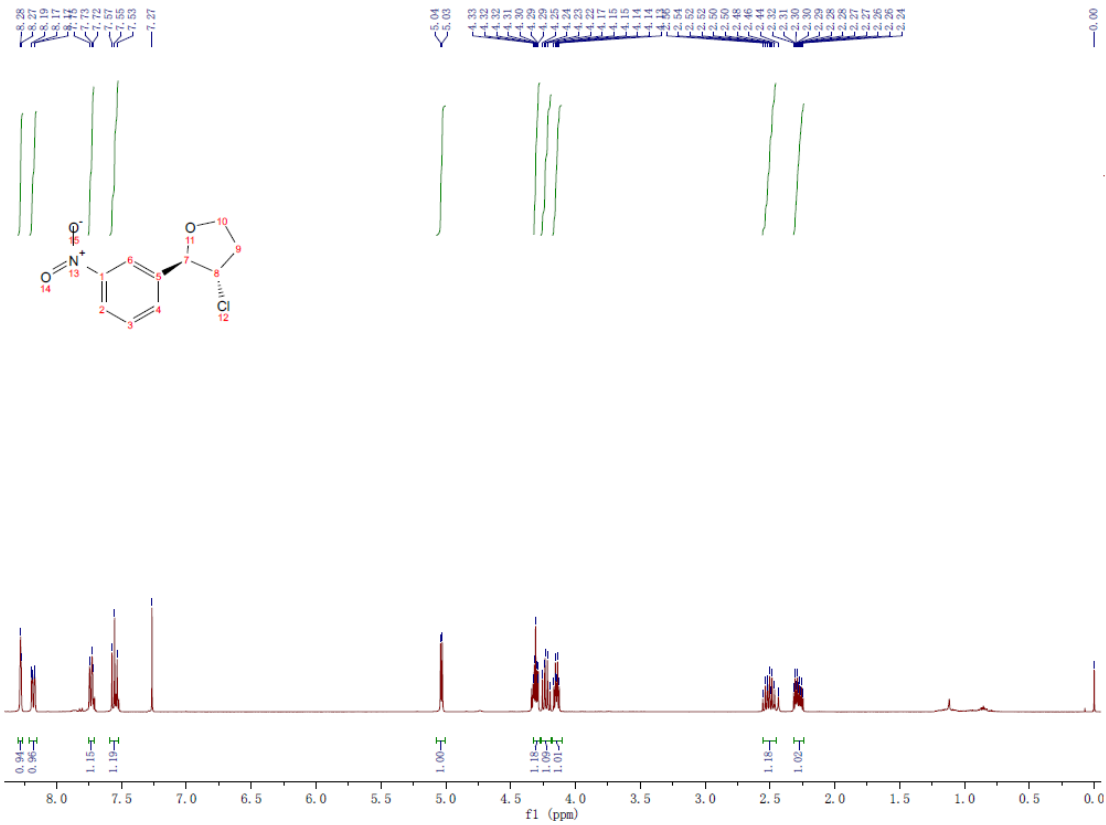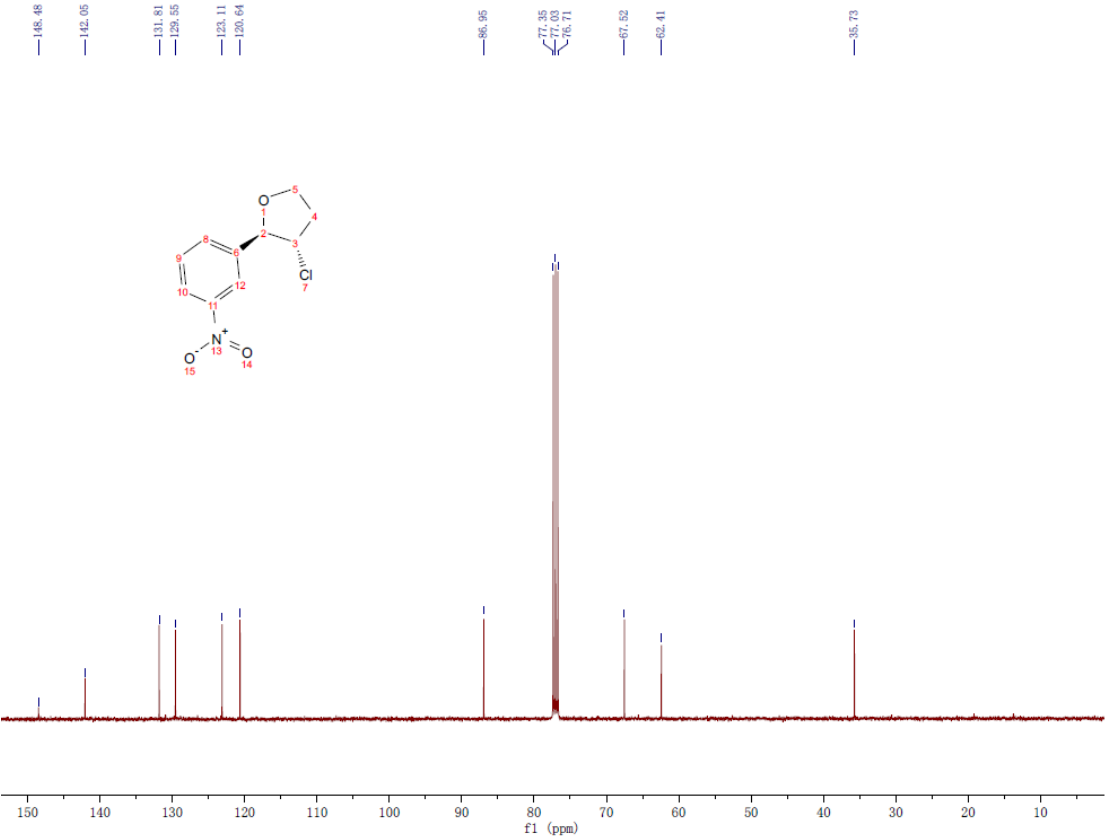

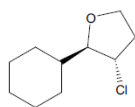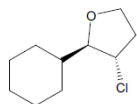

2t

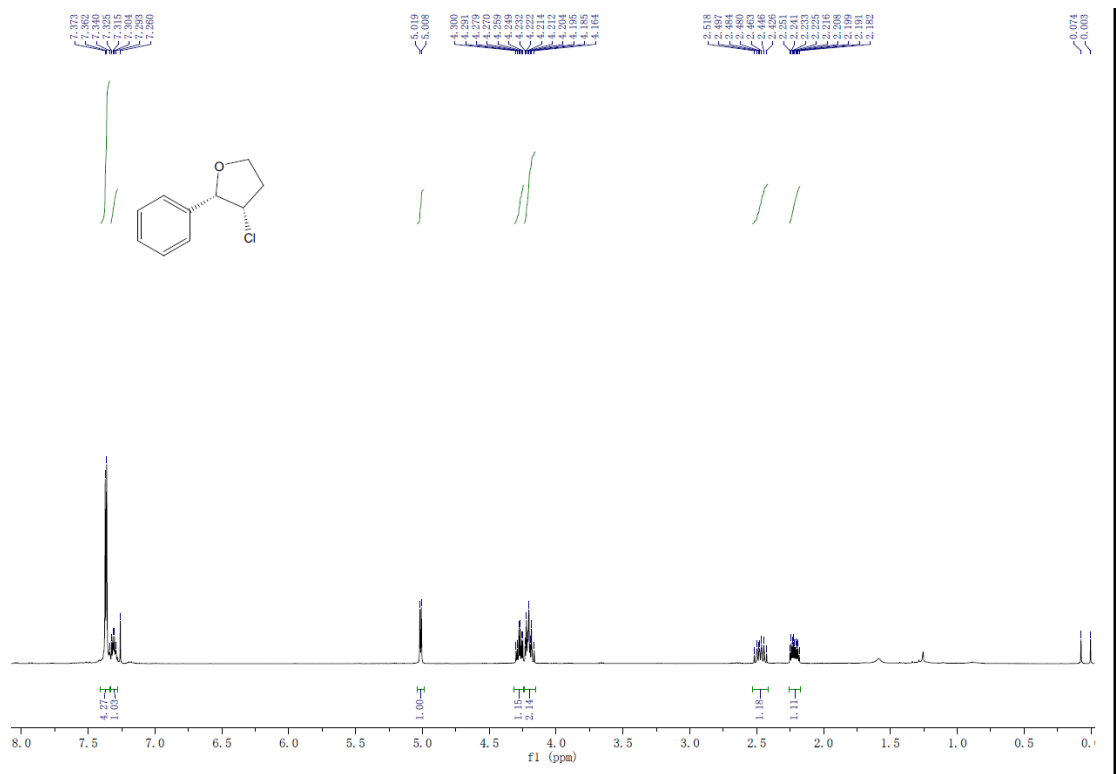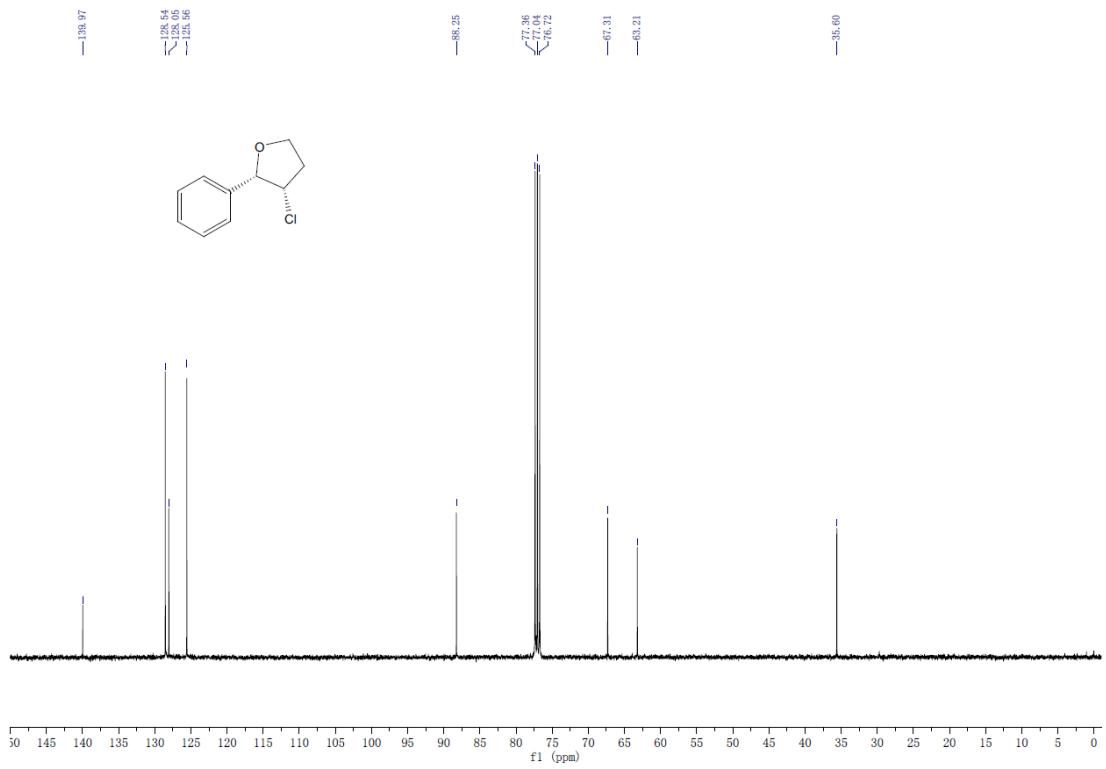

2u

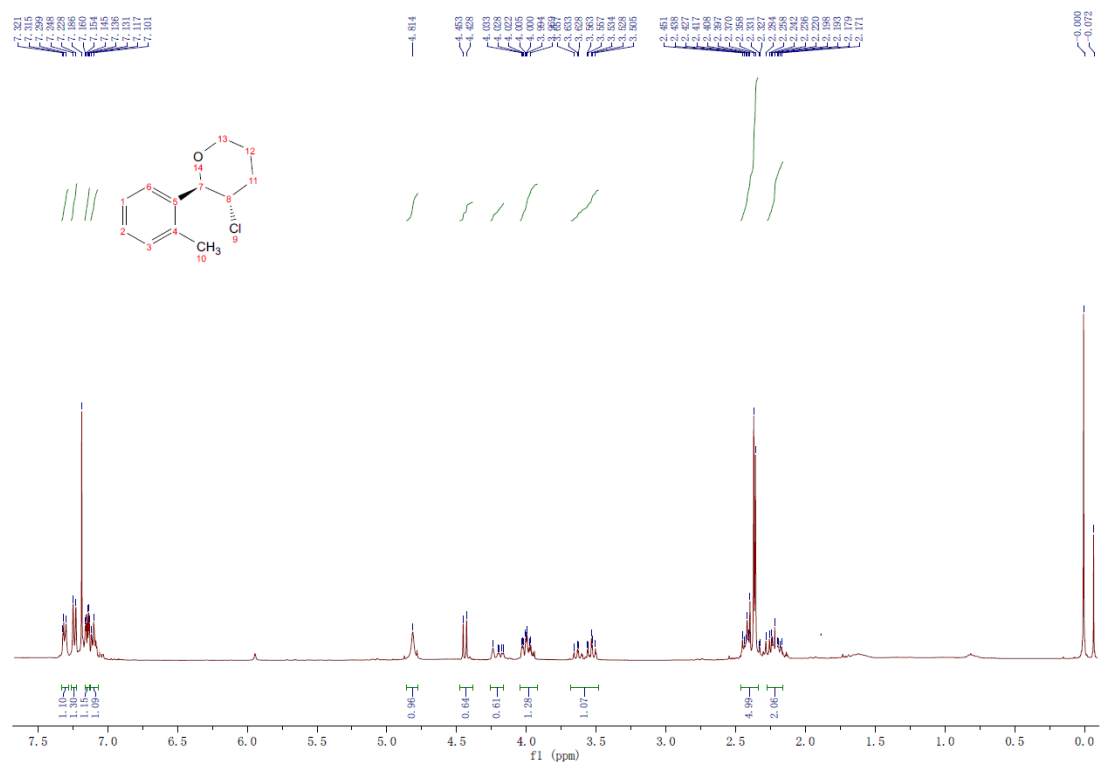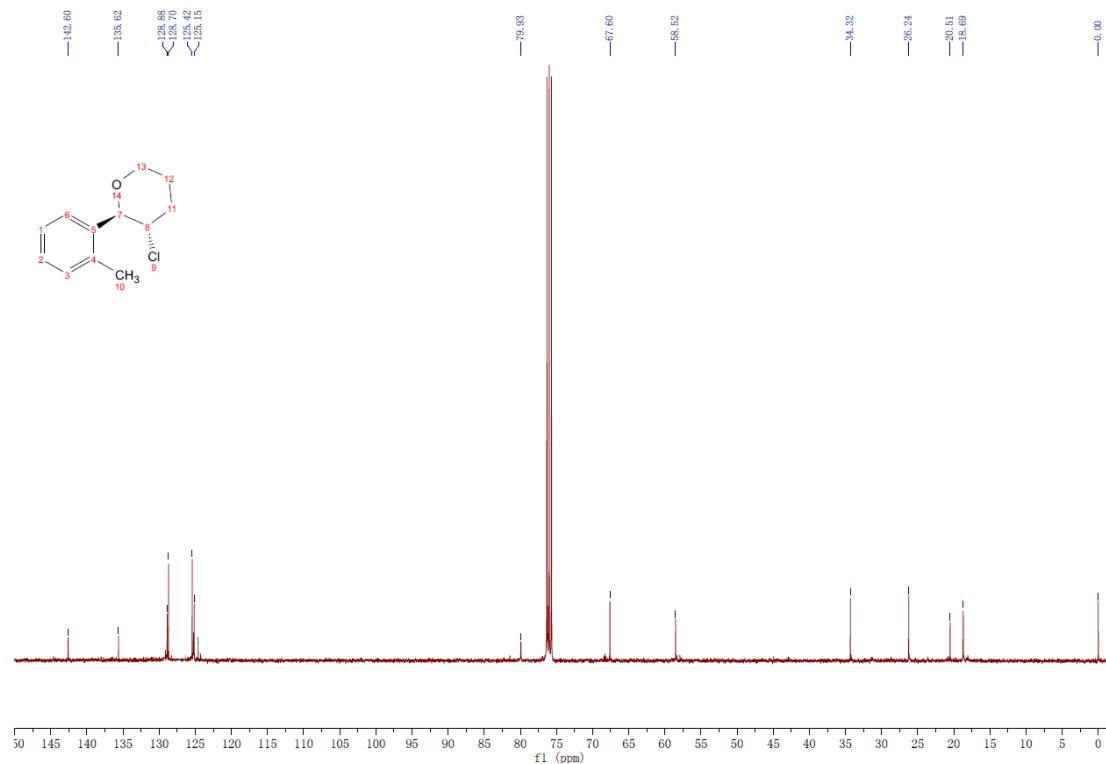

## HPLC Spectra of the Chiral Compounds

2a

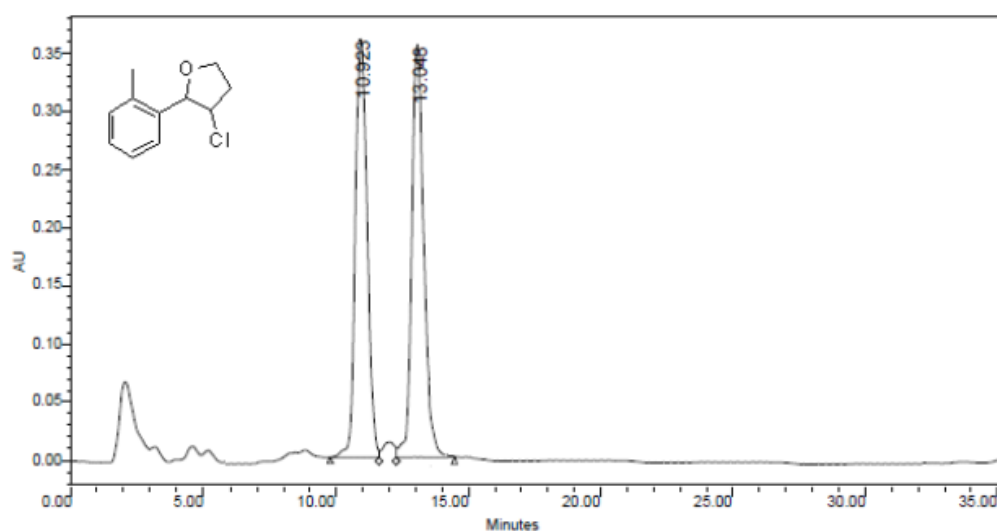

|   | RT<br>(min) | Area<br>(UVSec) | %Area  | Heigh<br>(UV) | %<br>Heigh |
|---|-------------|-----------------|--------|---------------|------------|
| 1 | 10.923      | 1232098         | 50.443 | 59764         | 50.37      |
| 2 | 13.046      | 1035166         | 49.563 | 54442         | 49.63      |

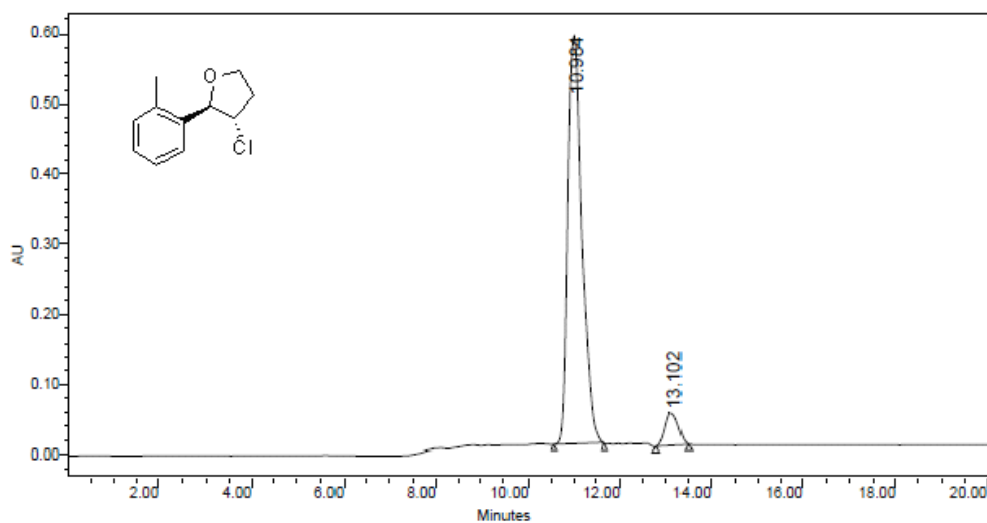

|   | RT<br>(min) | Area<br>(UVSec) | %Area  | Heigh<br>(UV) | %<br>Heigh |
|---|-------------|-----------------|--------|---------------|------------|
| 1 | 10.984      | 2651883         | 93.195 | 82271         | 92.60      |
| 2 | 13.102      | 923938          | 6.81   | 46510         | 7.40       |

2b

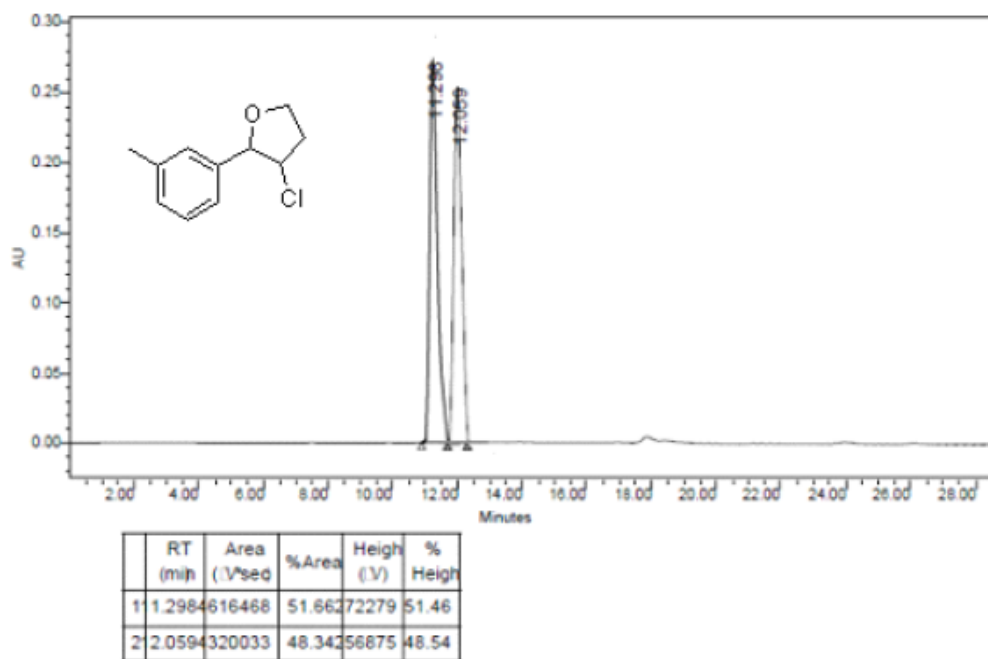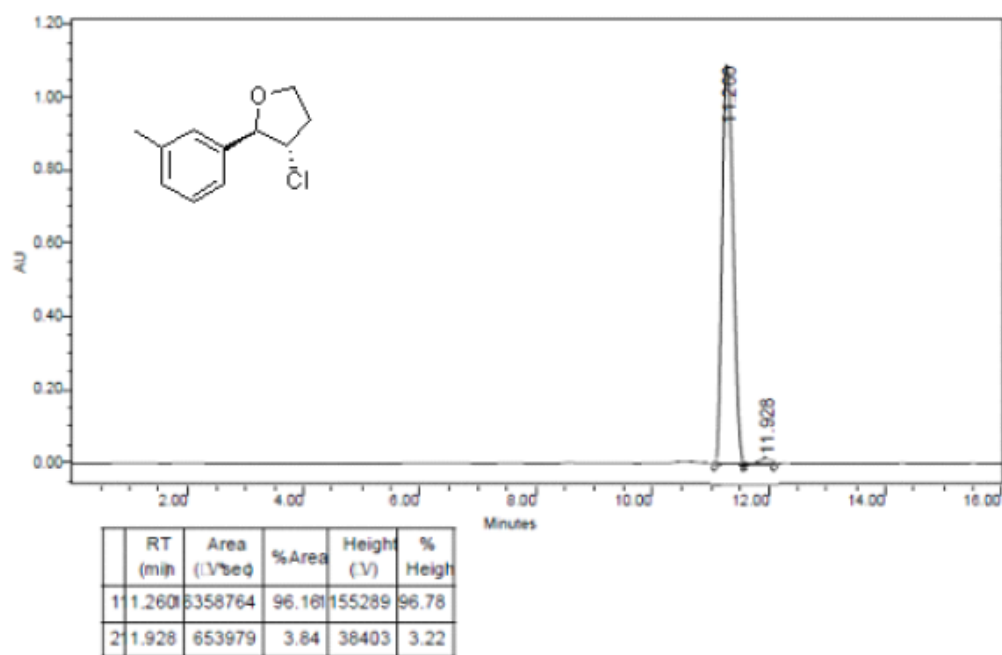



2c

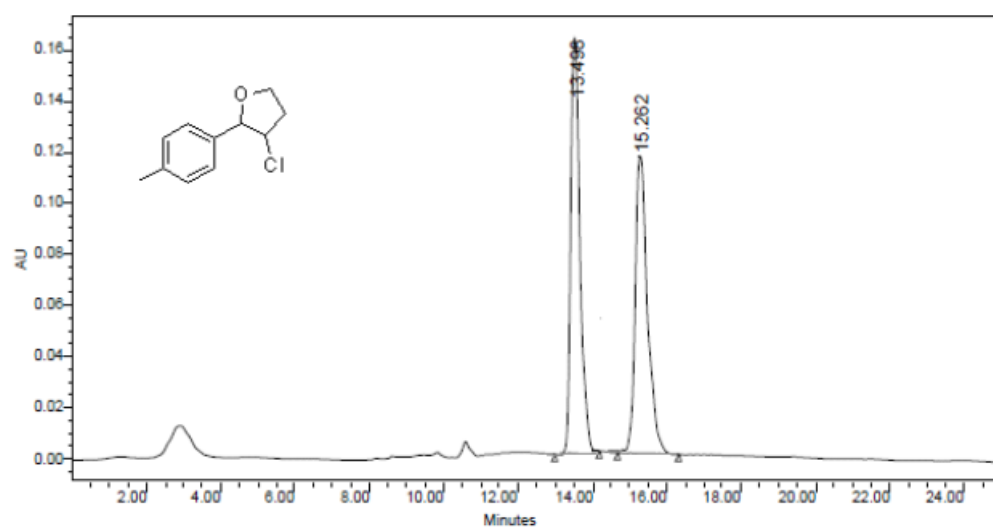

|   | RT<br>(min) | Area<br>(1V*sec) | %Area | Heigh<br>(1V) | %<br>Heigh |
|---|-------------|------------------|-------|---------------|------------|
| 1 | 13.496      | 756607           | 50.82 | 164327        | 58.10      |
| 2 | 15.262      | 667727           | 49.18 | 118526        | 41.90      |

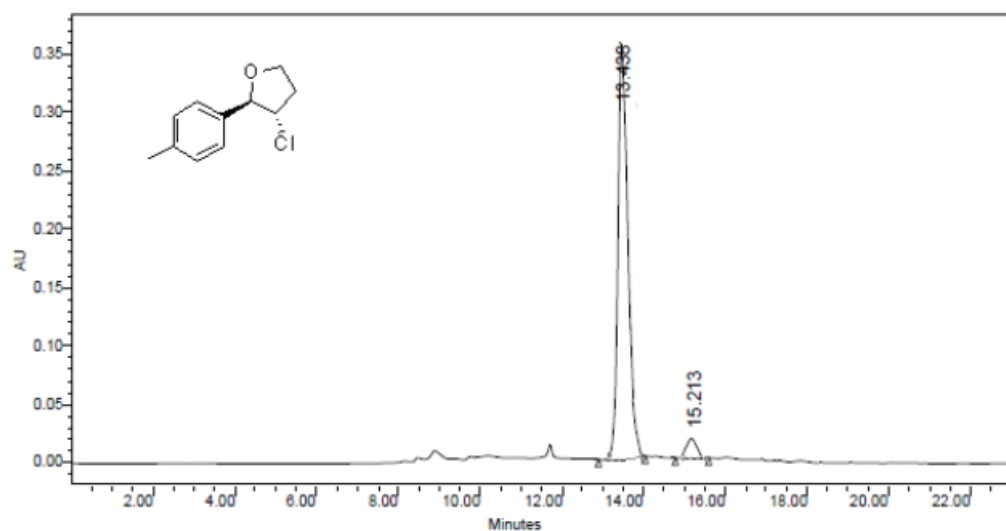

|   | RT<br>(min) | Area<br>(1V*sec) | %Area | Heigh<br>(1V) | %<br>Heigh |
|---|-------------|------------------|-------|---------------|------------|
| 1 | 13.438      | 732372           | 95.17 | 160172        | 96.43      |
| 2 | 15.213      | 291057           | 4.83  | 13333         | 3.57       |

2d

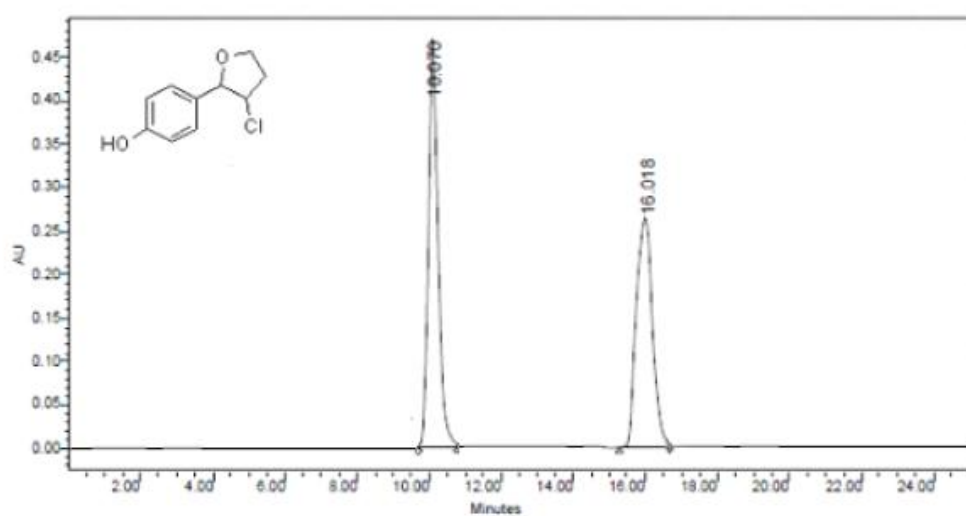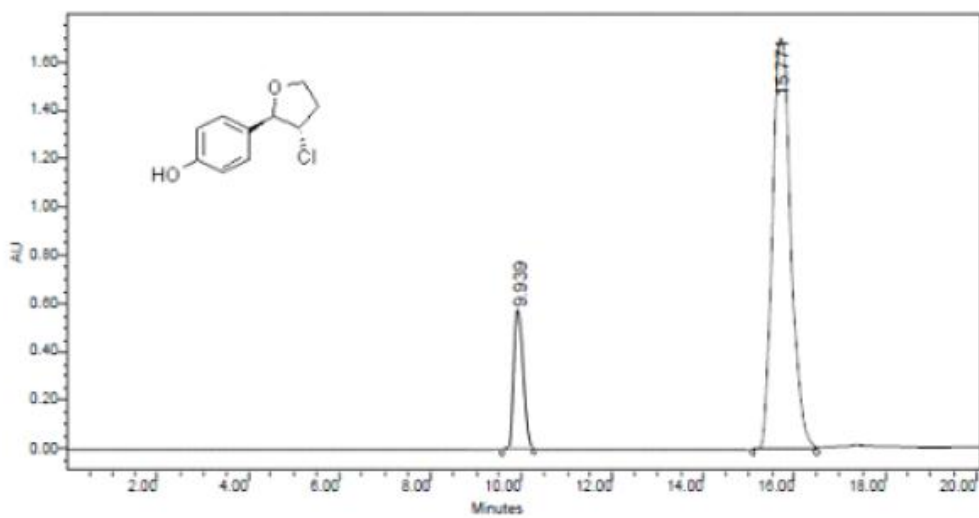

2e

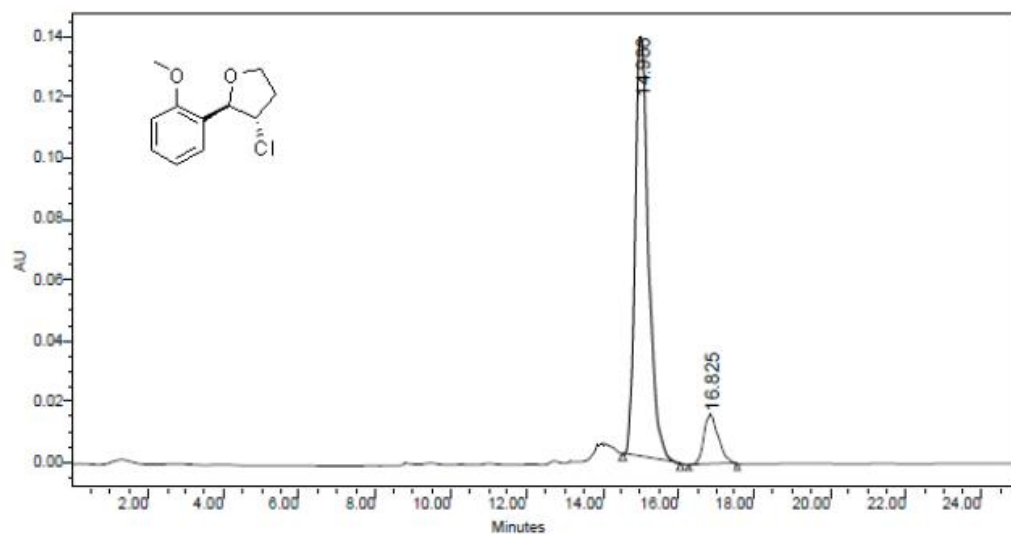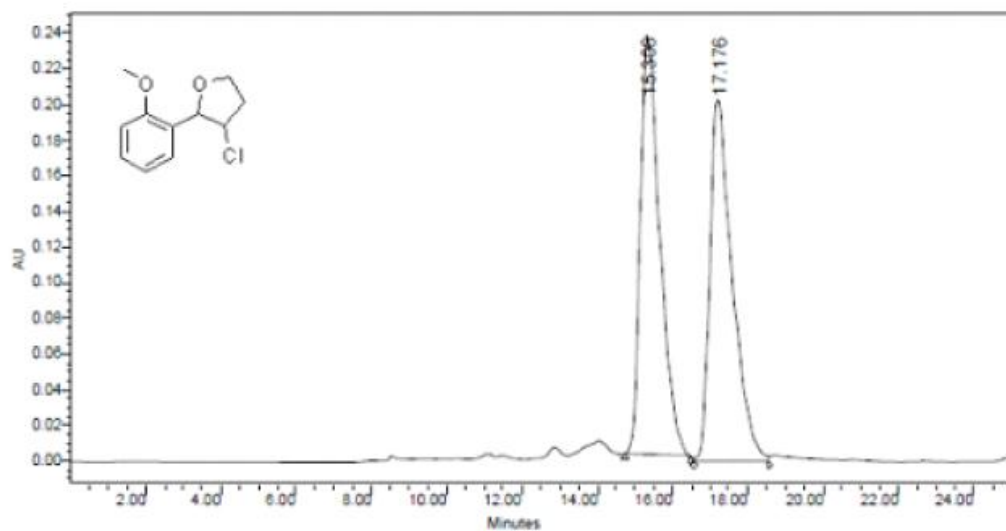

2f

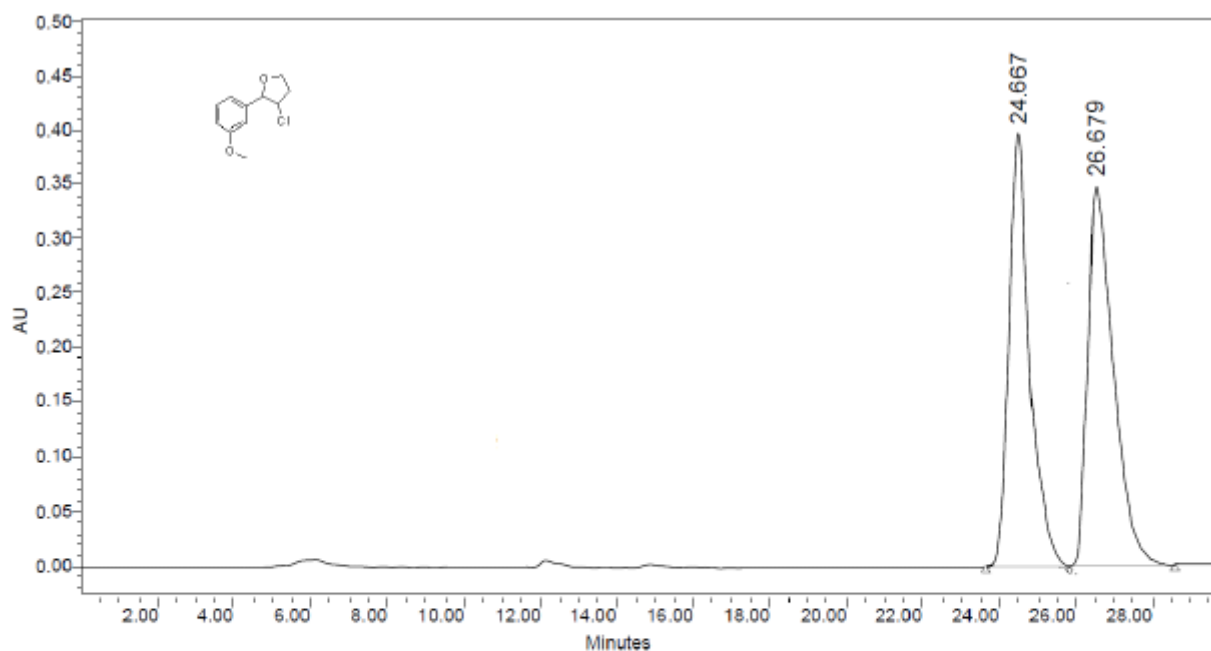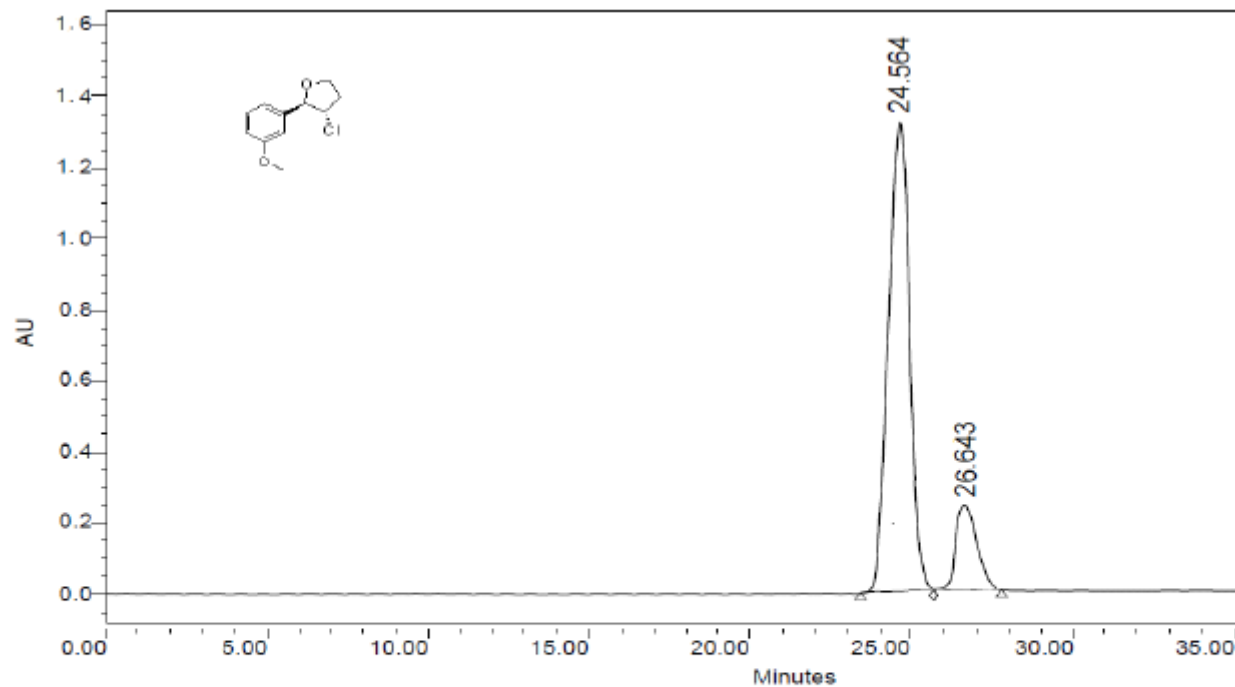

2g

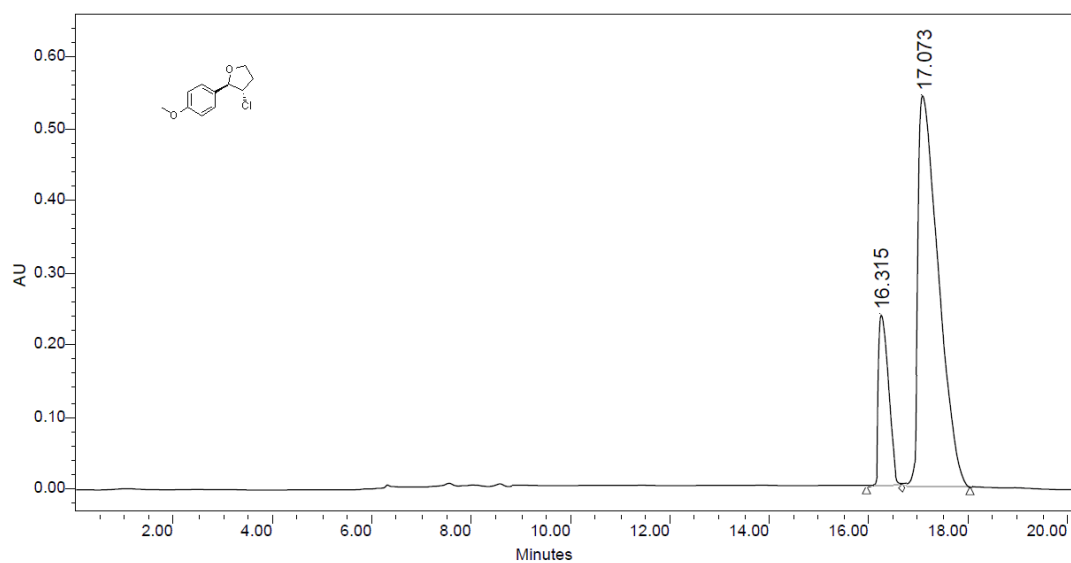

|   | RT (min) | Area (AU*sec) | %Area  | Height (AU) | %Height |
|---|----------|---------------|--------|-------------|---------|
| 1 | 16.315   | 3739251       | 19.273 | 16147       | 31.73   |
| 2 | 17.073   | 5666163       | 80.735 | 44665       | 68.27   |

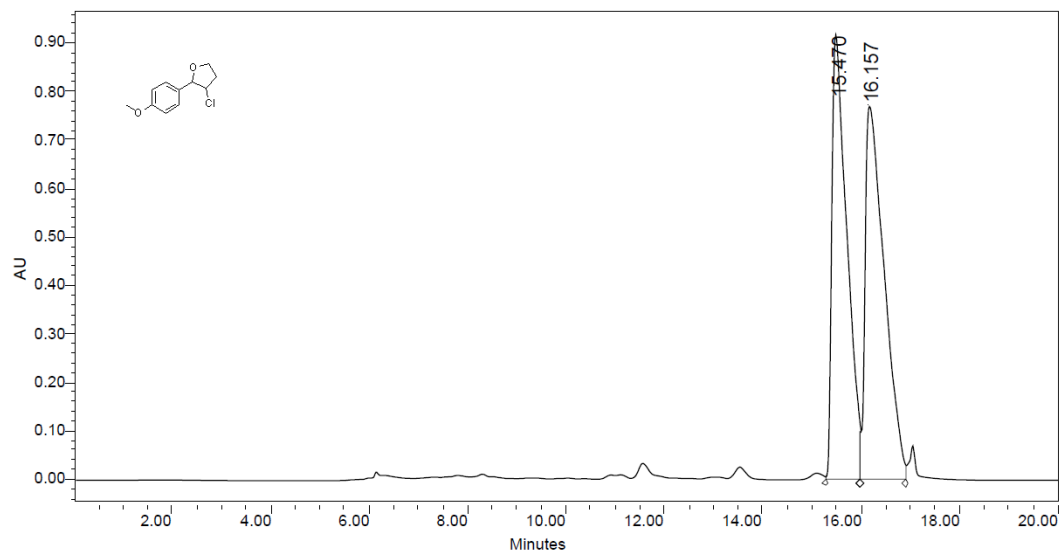

|   | RT (min) | Area (AU*sec) | %Area  | Height (AU) | %Height |
|---|----------|---------------|--------|-------------|---------|
| 1 | 15.470   | 9615509       | 48.529 | 18666       | 54.33   |
| 2 | 16.157   | 814418        | 51.487 | 72149       | 45.67   |

2h

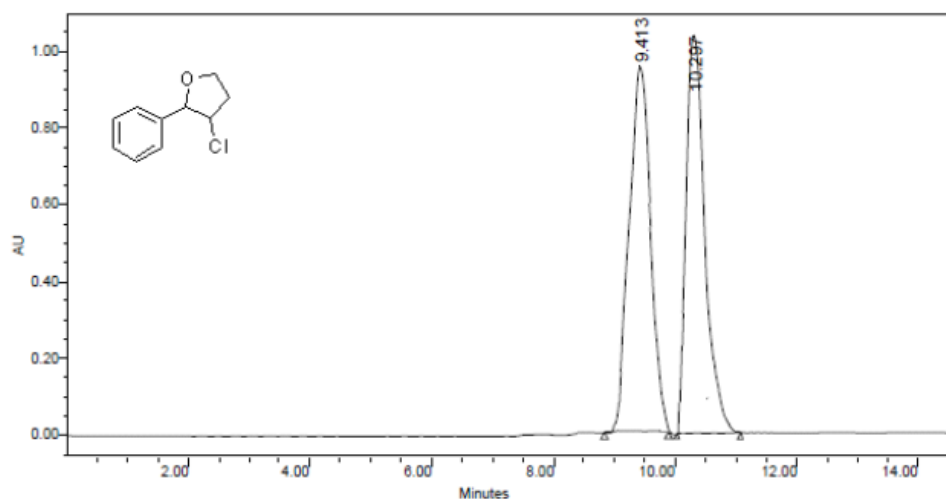

|   | RT<br>(min) | Area<br>(AU*sec) | %Area  | Height<br>(AU) | % Height |
|---|-------------|------------------|--------|----------------|----------|
| 1 | 9.413       | 3333059          | 49.926 | 25365          | 46.59    |
| 2 | 10.287      | 3394369          | 50.089 | 46277          | 53.41    |

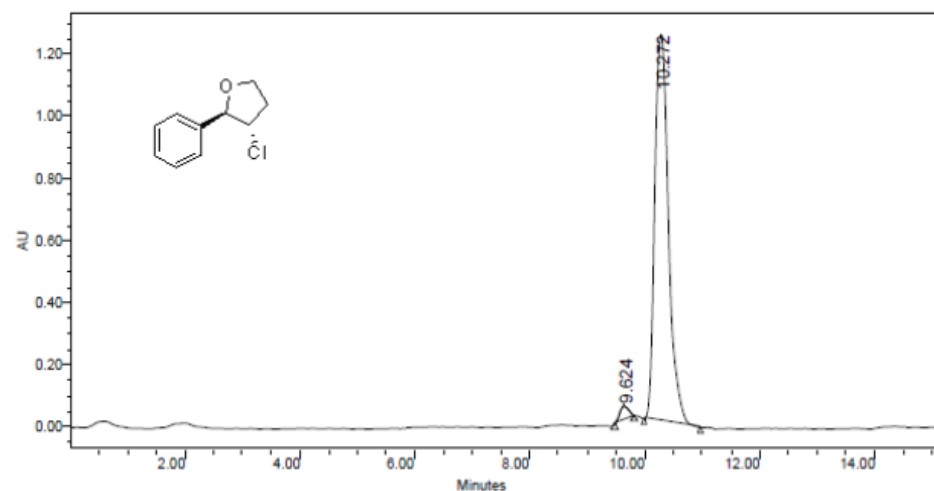

|   | RT<br>(min) | Area<br>(AU*sec) | %Area | Height<br>(AU) | % Height |
|---|-------------|------------------|-------|----------------|----------|
| 1 | 9.624       | 501899           | 2.37  | 45802          | 3.54     |
| 2 | 10.272      | 1696783          | 97.63 | 248066         | 96.46    |

2i

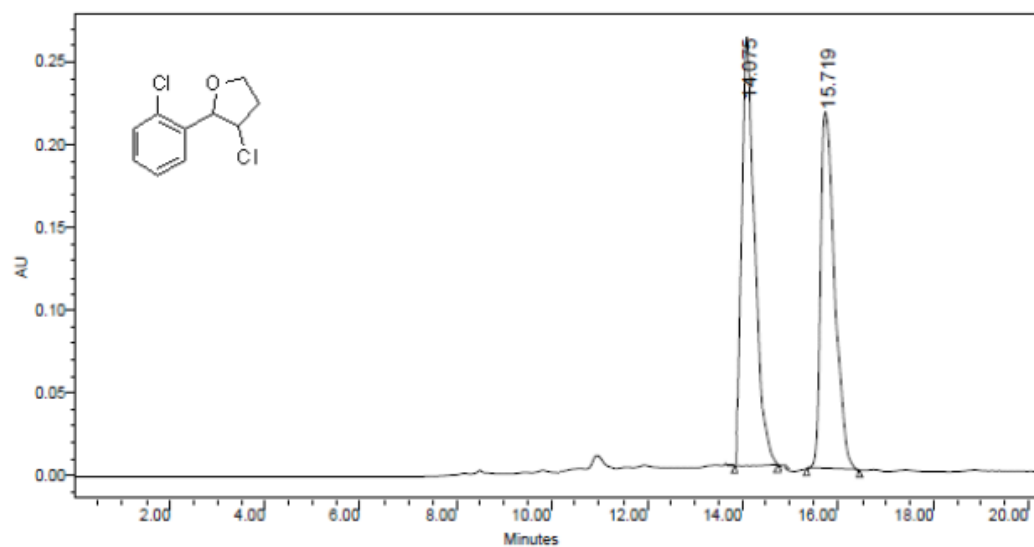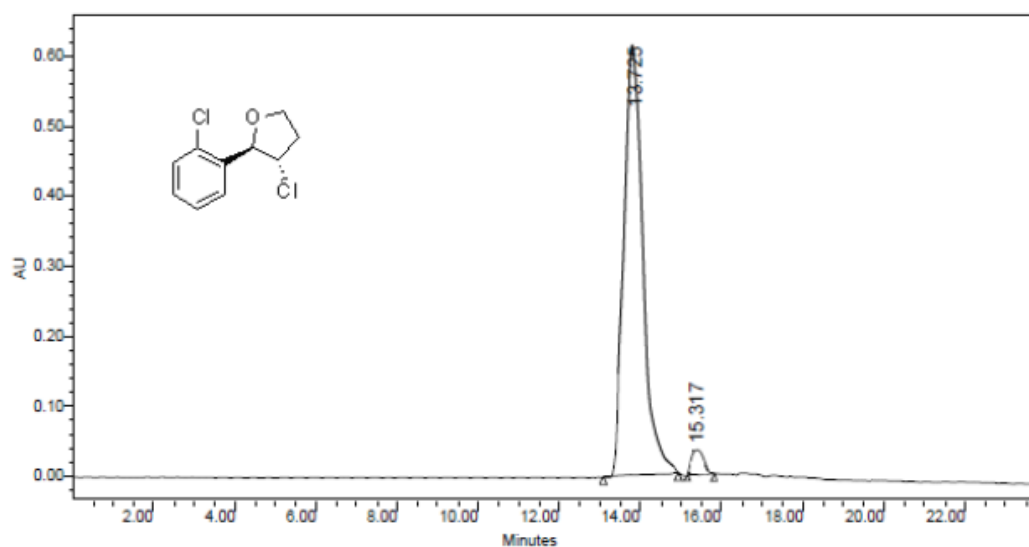

2j

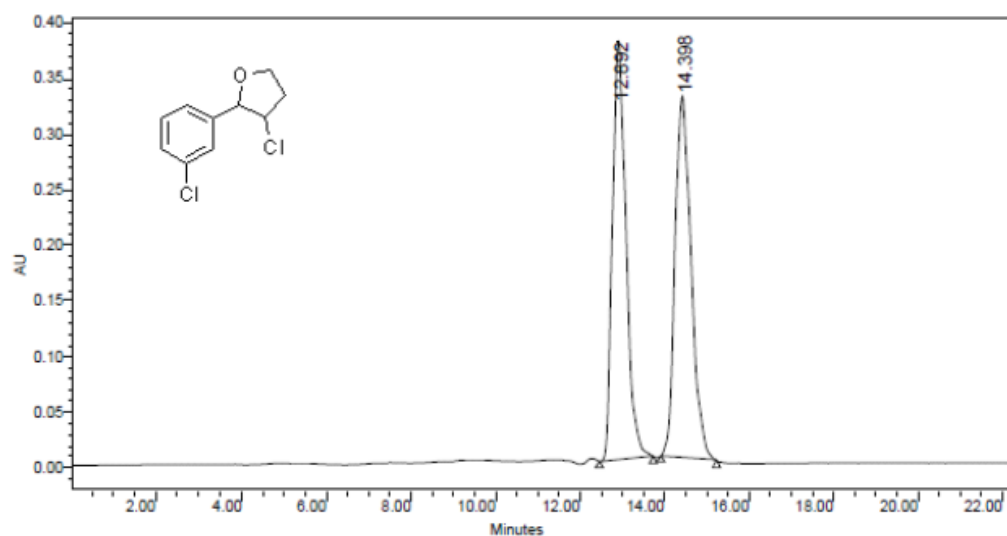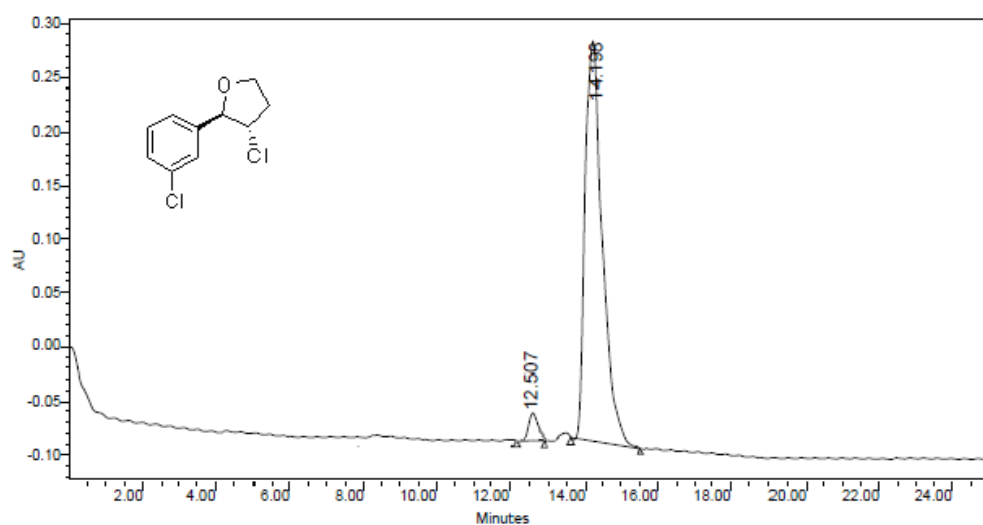



2k

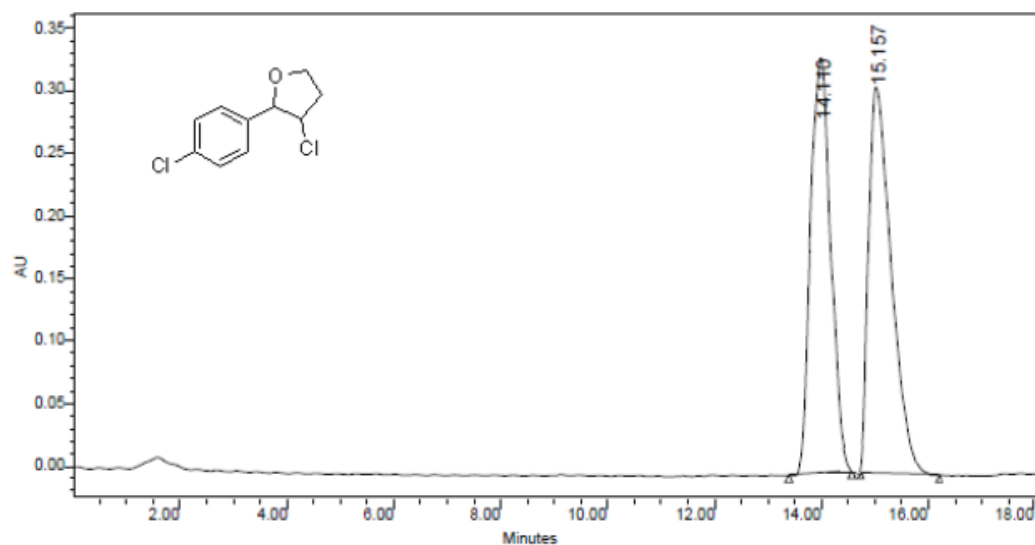

|   | RT<br>(min) | Area<br>(V*sec) | %Area | Heigh<br>(V) | %<br>Heigh |
|---|-------------|-----------------|-------|--------------|------------|
| 1 | 14.110      | 2969176         | 49.70 | 179788       | 54.15      |
| 2 | 15.157      | 3004894         | 50.30 | 152213       | 45.85      |

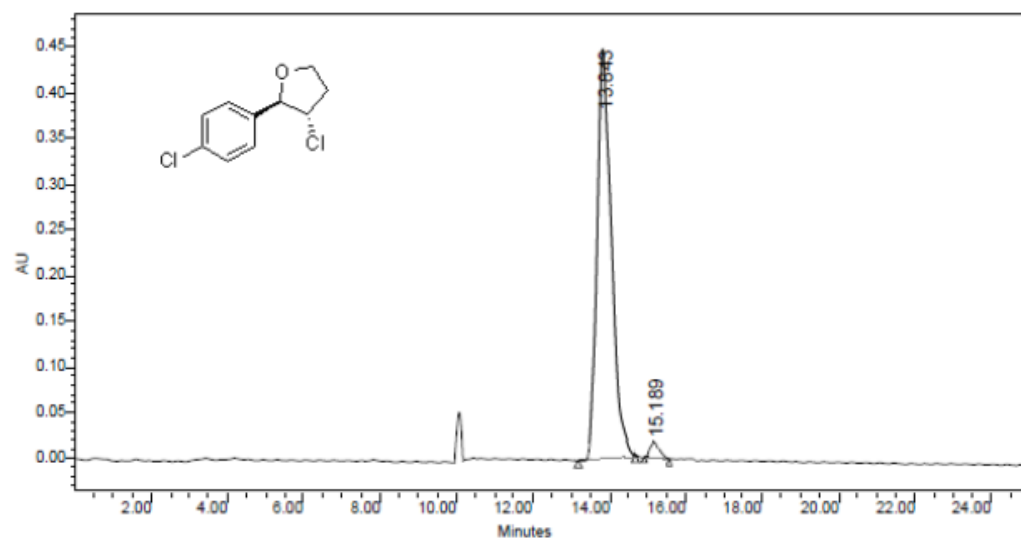

|   | RT<br>(min) | Area<br>(V*sec) | %Area | Heigh<br>(V) | %<br>Heigh |
|---|-------------|-----------------|-------|--------------|------------|
| 1 | 13.843      | 1817789         | 98.18 | 46629        | 96.67      |
| 2 | 15.189      | 219483          | 1.82  | 15376        | 3.33       |

21

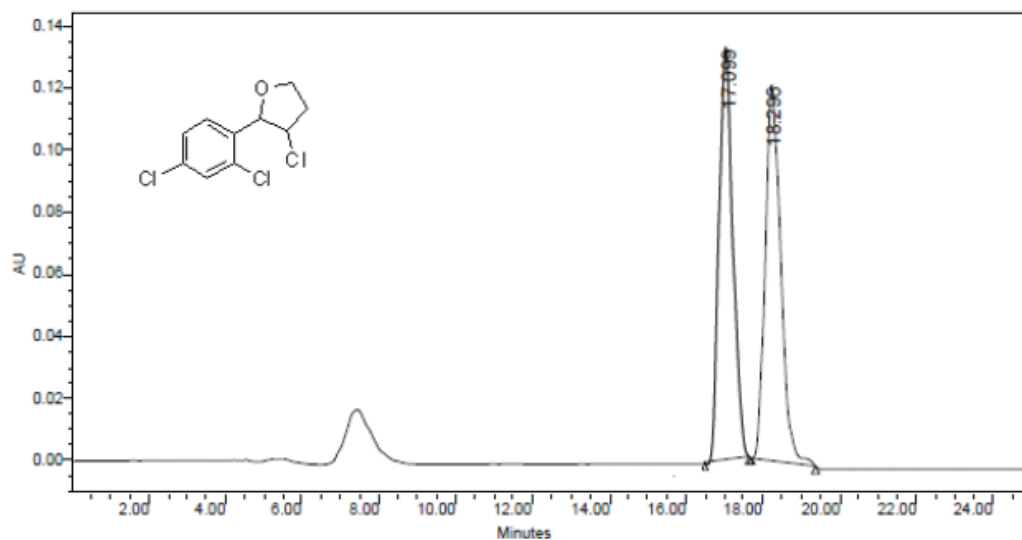

|   | RT<br>(min) | Area<br>(1/V*sec) | %Area | Heigh<br>(1/V) | %<br>Heigh |
|---|-------------|-------------------|-------|----------------|------------|
| 1 | 7.099       | 327926            | 49.47 | 32909          | 52.33      |
| 2 | 8.296       | 3399031           | 50.53 | 21077          | 47.67      |

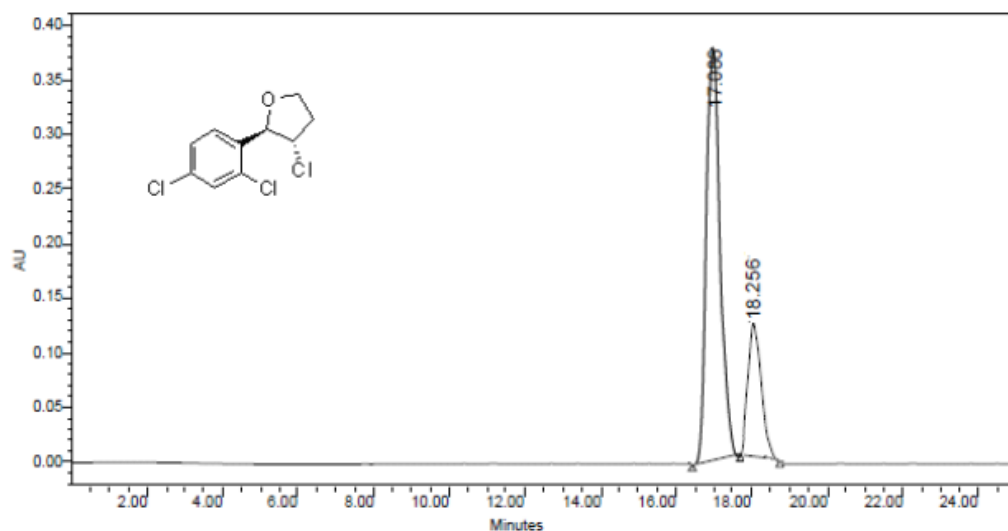

|   | RT<br>(min) | Area<br>(1/V*sec) | %Area | Heigh<br>(1/V) | %<br>Heigh |
|---|-------------|-------------------|-------|----------------|------------|
| 1 | 7.086       | 559437            | 76.23 | 77944          | 67.28      |
| 2 | 8.256       | 2980285           | 23.77 | 183823         | 32.72      |

2m

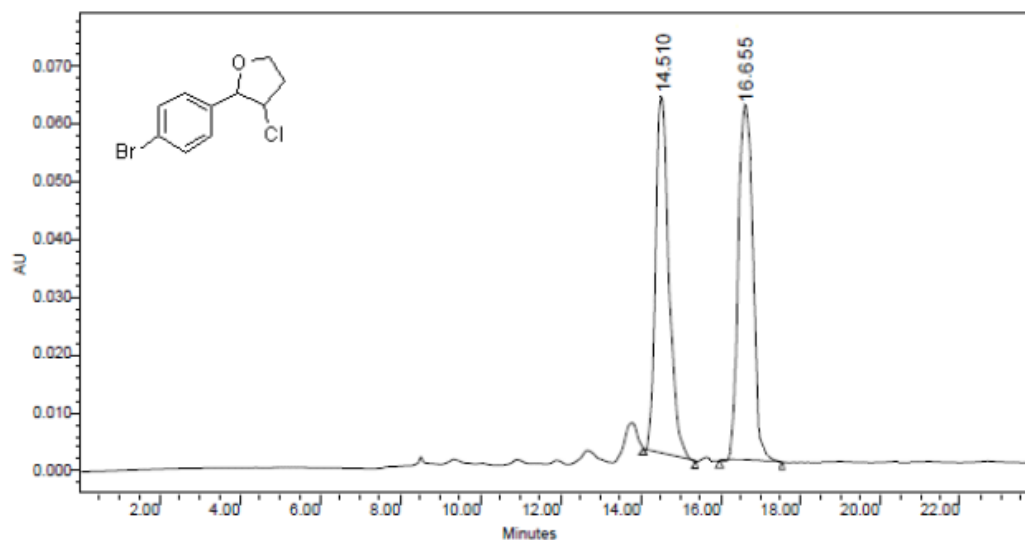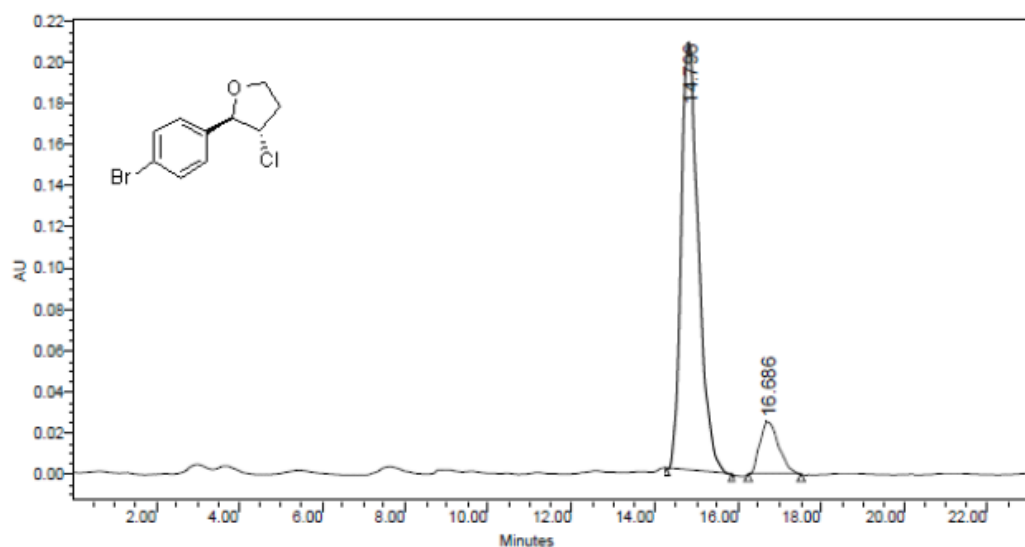

2n

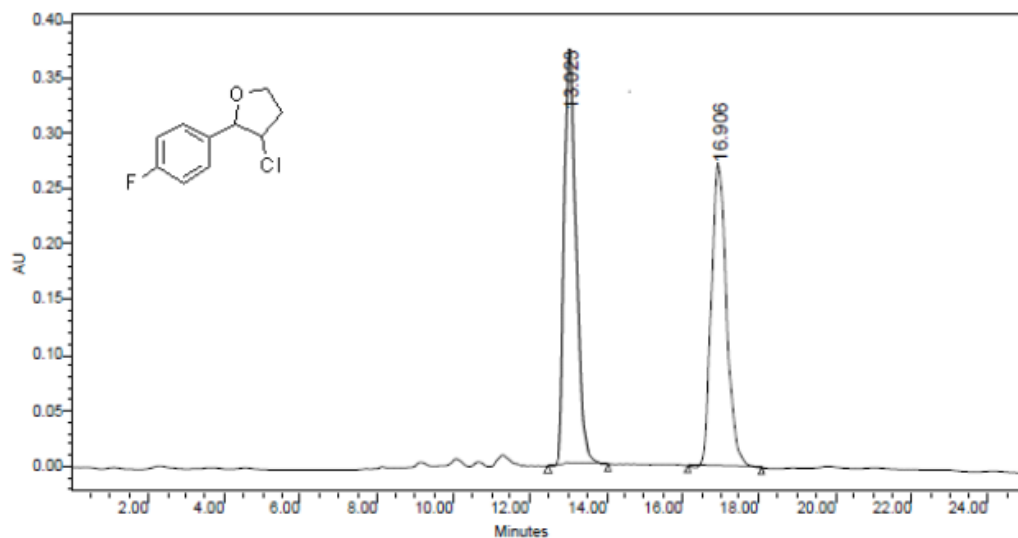

|   | RT<br>(min) | Area<br>(1/V*sec) | %Area  | Heigh<br>(1/V) | %<br>Heigh |
|---|-------------|-------------------|--------|----------------|------------|
| 1 | 13.023      | 764916            | 50.523 | 67585          | 57.47      |
| 2 | 16.906      | 606255            | 49.482 | 72000          | 42.53      |

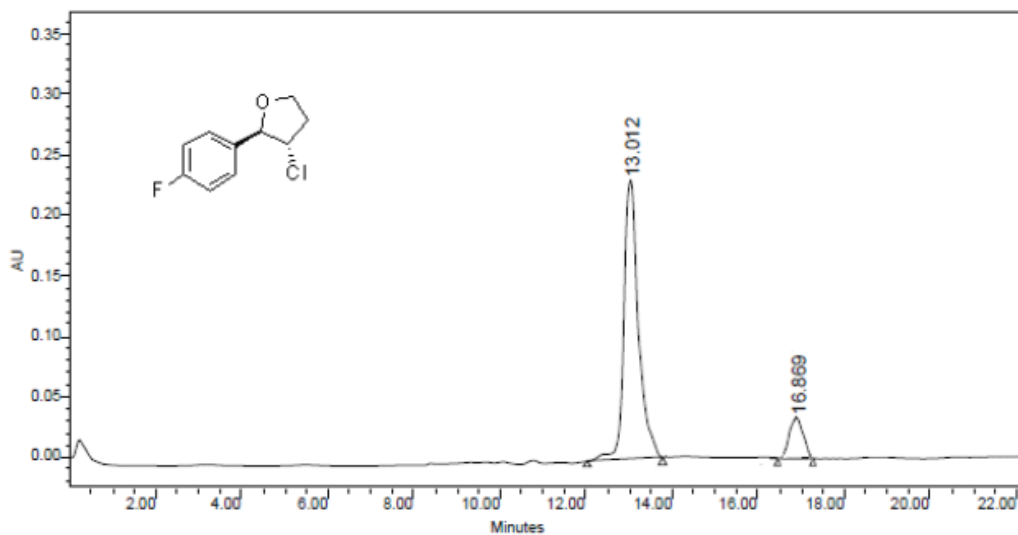

|   | RT<br>(min) | Area<br>(1/V*sec) | %Area  | Heigh<br>(1/V) | %<br>Heigh |
|---|-------------|-------------------|--------|----------------|------------|
| 1 | 13.012      | 452249            | 85.212 | 30808          | 86.15      |
| 2 | 16.869      | 946384            | 14.79  | 37109          | 13.85      |

20

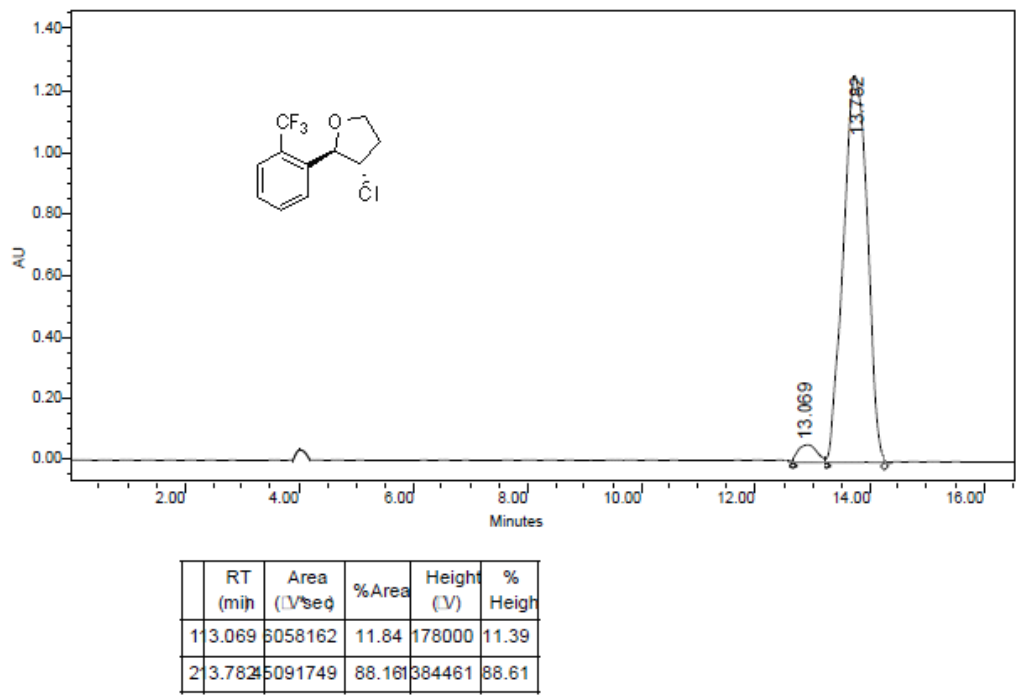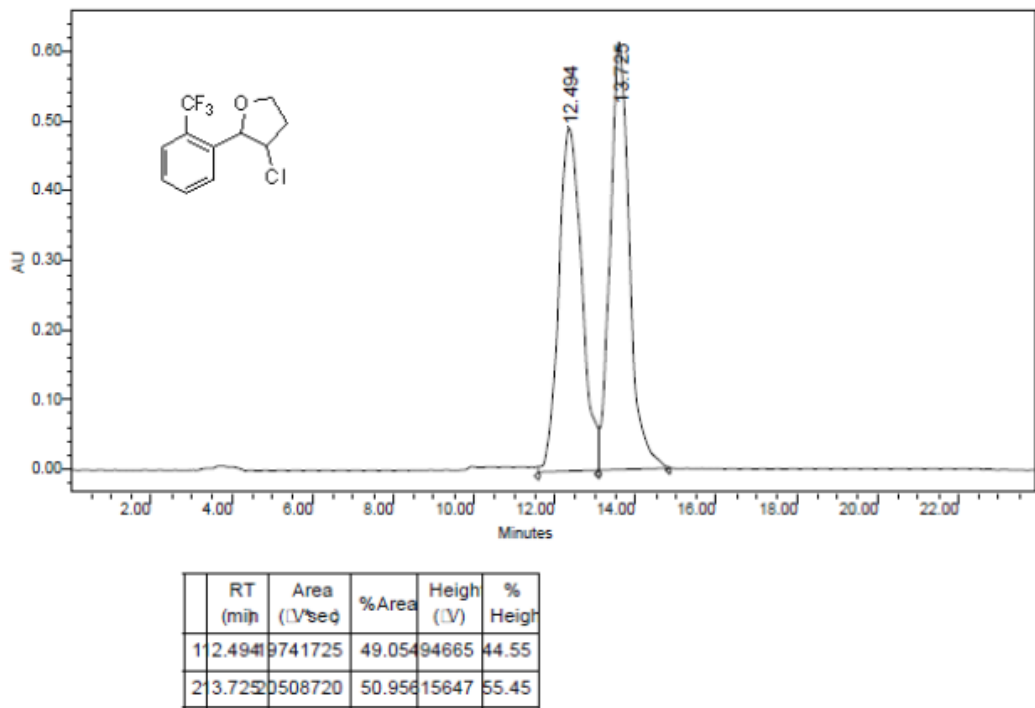

2p

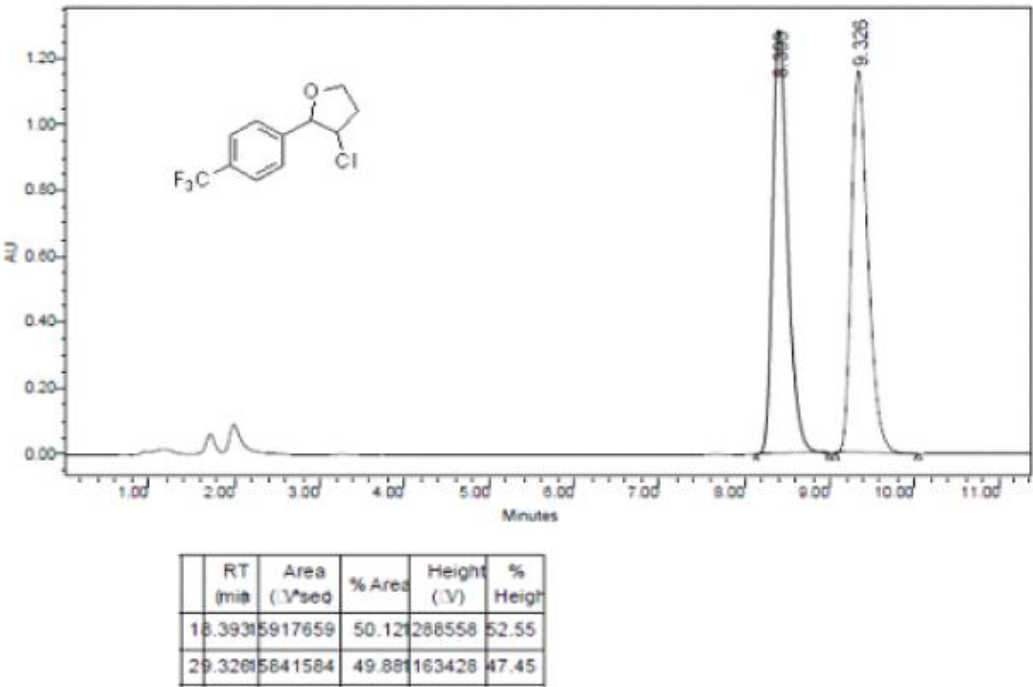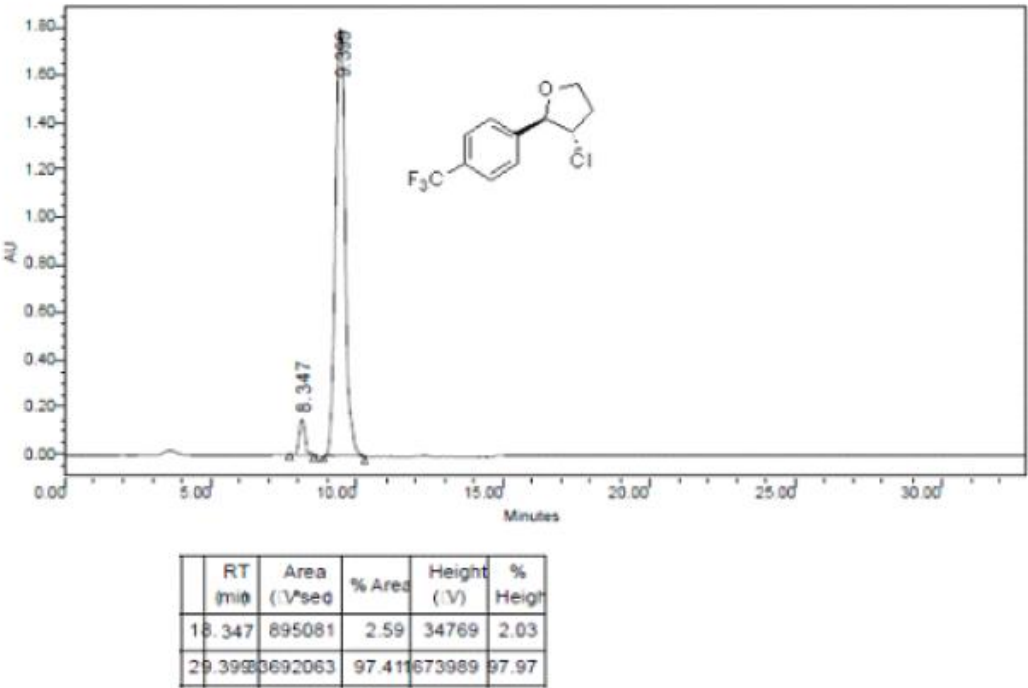

2q

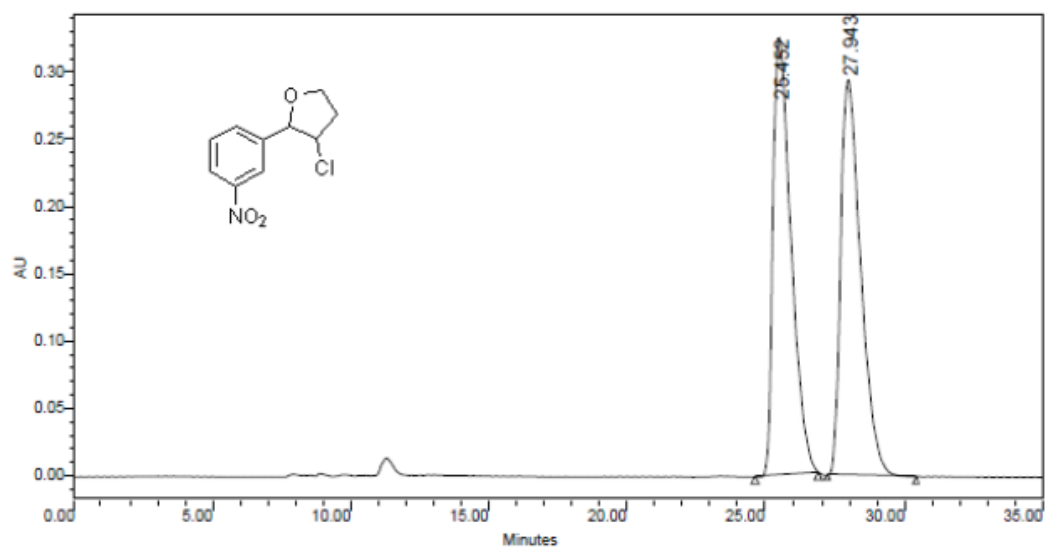

| RT<br>(min) | Area<br>(AU*sec) | %Area  | Height<br>(AU) | %<br>Height |
|-------------|------------------|--------|----------------|-------------|
| 26.452      | 4765074          | 49.983 | 25081          | 52.54       |
| 27.943      | 4774384          | 50.022 | 93704          | 47.46       |

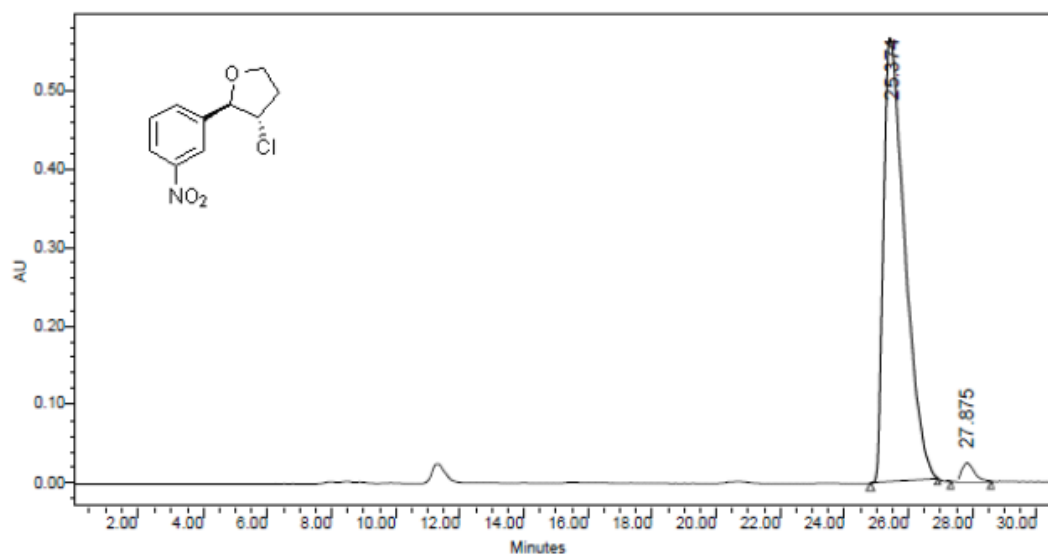

| RT<br>(min) | Area<br>(AU*sec) | %Area  | Height<br>(AU) | %<br>Height |
|-------------|------------------|--------|----------------|-------------|
| 26.374      | 6177984          | 98.135 | 66184          | 92.30       |
| 27.875      | 498759           | 1.87   | 47224          | 7.70        |

2r

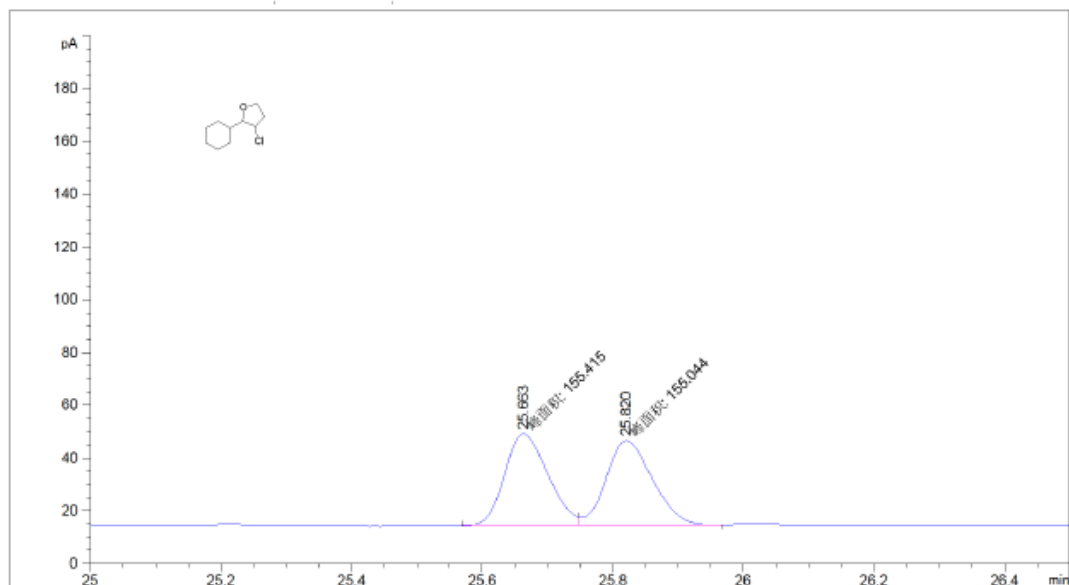

| 峰 # | 保留时间 [min] | 类型   | 峰宽 [min] | 峰面积 [pA*s] | 峰高 [pA]  | 峰面积 %    |
|-----|------------|------|----------|------------|----------|----------|
| 1   | 25.663     | MF T | 0.0756   | 155.41458  | 34.26678 | 50.05974 |
| 2   | 25.820     | FM T | 0.0815   | 155.04362  | 31.71597 | 49.94026 |

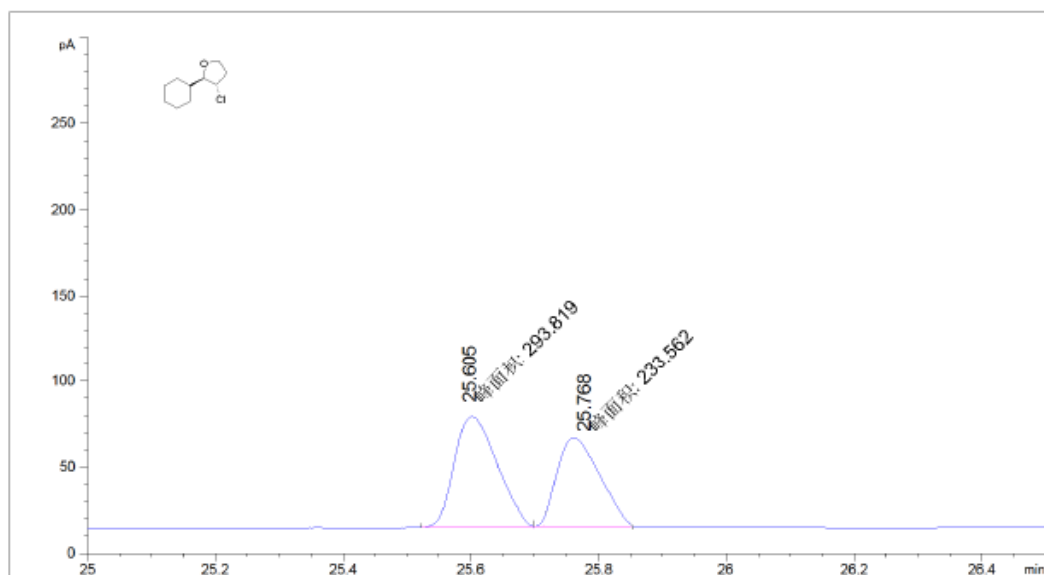

| 峰 # | 保留时间 [min] | 类型 | 峰宽 [min] | 峰面积 [pA*s] | 峰高 [pA]  | 峰面积 %    |
|-----|------------|----|----------|------------|----------|----------|
| 1   | 25.605     | MM | 0.0771   | 293.81860  | 63.47786 | 55.71279 |
| 2   | 25.768     | MM | 0.0763   | 233.56227  | 50.98784 | 44.28721 |



2t

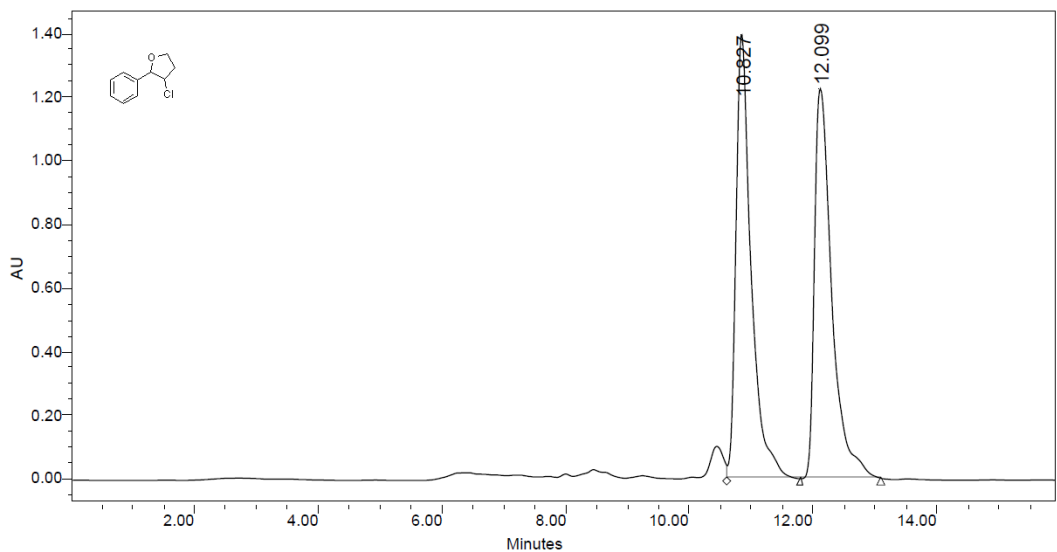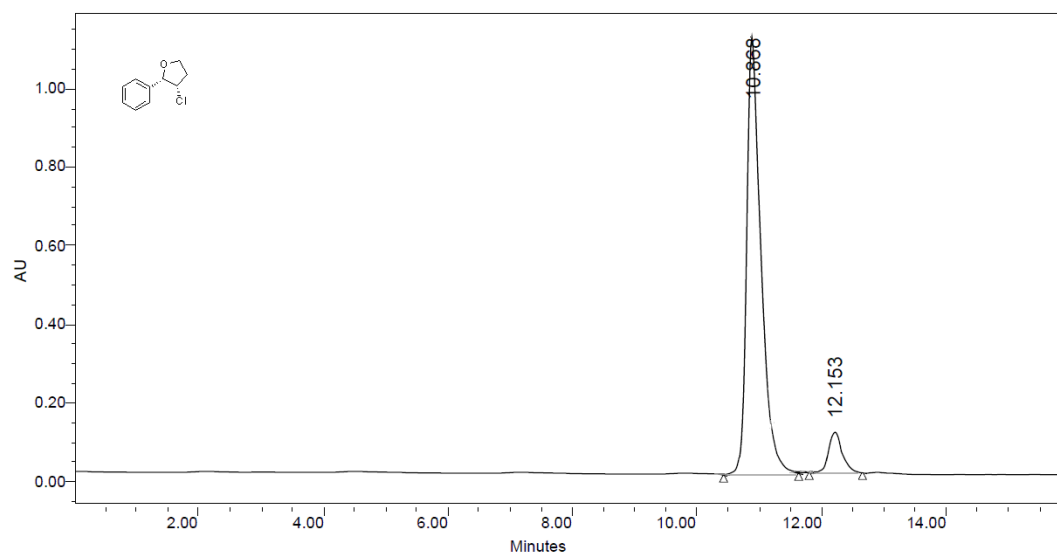

2u

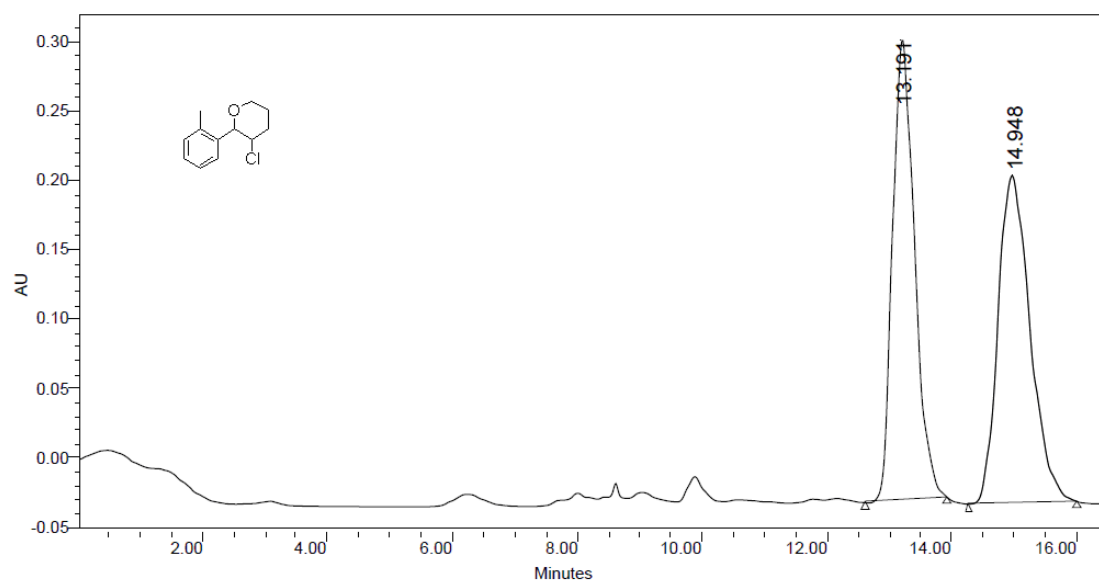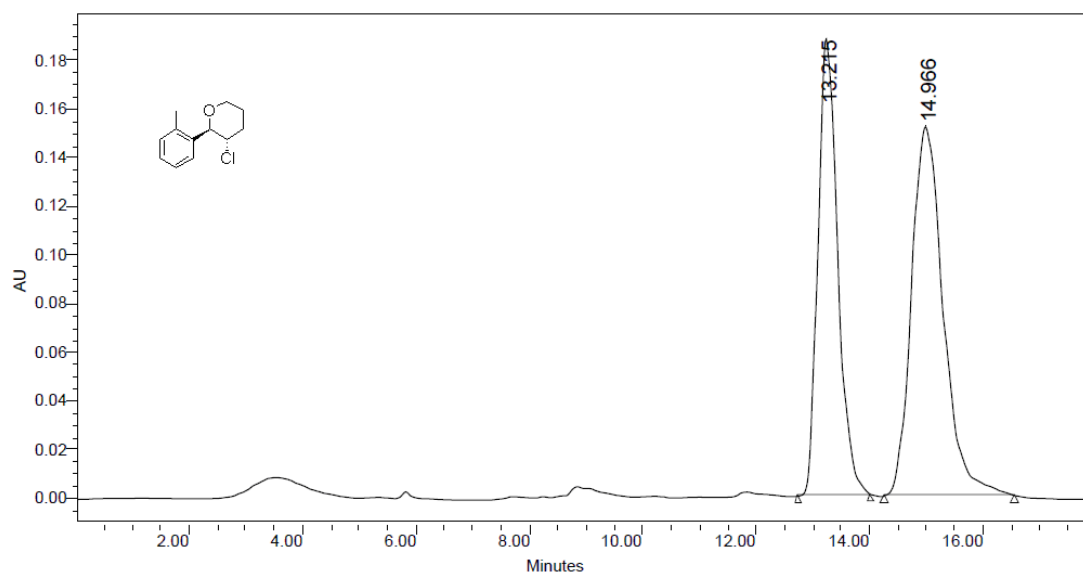

Supplement: c2cc38436a.pdf [file c2cc38436a.pdf]
